# Supplementary material for: Photochemistry of β-γ-Unsaturated Spirolactones
Source: MDPI journal article supplement (doi:10.3390/photochem3040025), 2023-10-17
Supplement: s1 [file s1]

# Photochemistry of $\beta$ - $\gamma$ -Unsaturated Spirolactones

Werner Fudickar, Melanie Metz, Tobias Krüger-Braunert, Alexandra Kelling, Eric Sperlich, Pablo Wessig and Torsten Linker\*

Department of Chemistry, University of Potsdam, Karl-Liebknecht-Str. 24-25, 14476 Golm, Germany

\* Correspondence: linker@uni-potsdam.de

## Supplementary Materials

### Table of Contents

1. DFT Calculations
2. Photochemical Setup
3. NMR Spectra
  - 3.1. Side Product 12a
  - 3.2. Oxa-Di- $\pi$ -Methane Rearrangements Products 13
  - 3.3. Products 20 and 26 from Reactions with Benzaldehyde (18)
  - 3.4. Products 27 from Reactions with Benzophenone (19)
4. X-Ray Structure Analyses

## 1. DFT calculations

### General

DFT calculations were performed with the functional MN15 [30] and the basis set 6-31G\* [31], using the program package Gaussian 16 [32]. All stationary point were characterized by frequency analysis. Energies were corrected by the zero point vibrational energy (ZPE). Biradicals were calculated with a spin-unrestricted wavefunction and using the keyword "guess=mix" to destroy  $\alpha$ - $\beta$  and spatial symmetries of the initial guess. Excited states were calculated using time-dependent DFT (TD-DFT) [33,34].

### Figure S1: Excited state of spirolactone 11a

Geometry of 11a was optimized at MN15/6-31G\* level and singlet excited states were calculated with TDDFT at same level.

Excited states and oscillator strength:

Excited State 1: Singlet-A 5.0648 eV **244.80 nm**  $f=0.0050$   $\langle S^2 \rangle=0.000$

|                    |                |
|--------------------|----------------|
| 38 -> 41           | 0.34377        |
| 38 -> 43           | 0.25724        |
| 39 -> 41           | -0.11933       |
| <b>40 -&gt; 41</b> | <b>0.49106</b> |
| 40 -> 43           | 0.20228        |

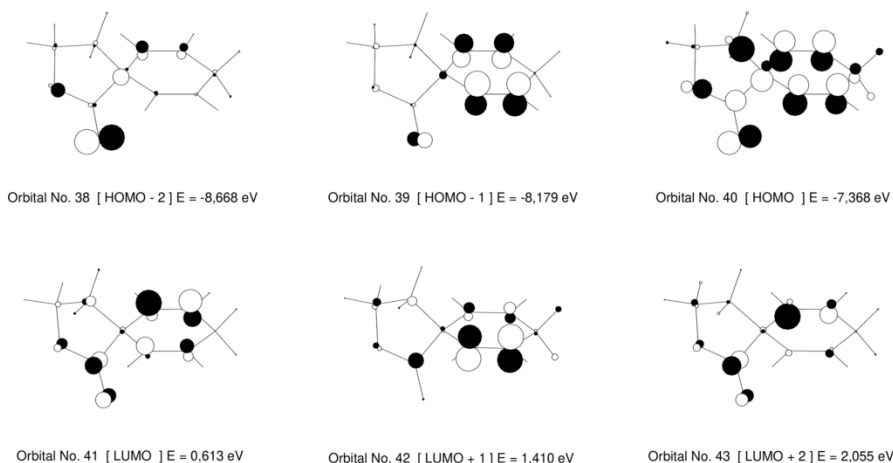

**Figure S2: Geometries and energies of BR4, BR2a, BR2b, BR3a, BR3b**

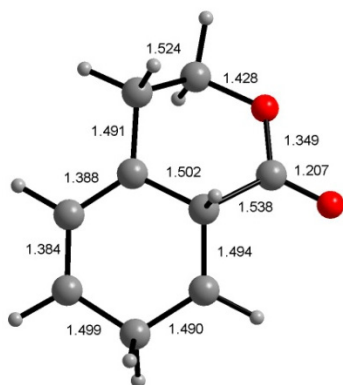

**BR4**  
 $E_{\text{REL}} = 0.0 \text{ kcal/mol}$

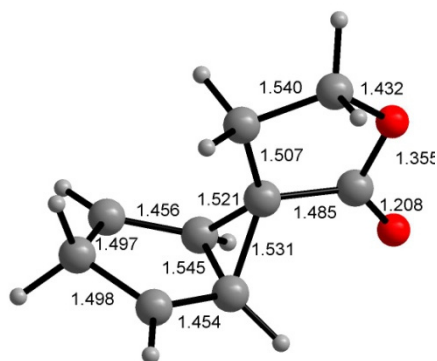

**BR2a**  
 $E_{\text{REL}} = 9.7 \text{ kcal/mol}$

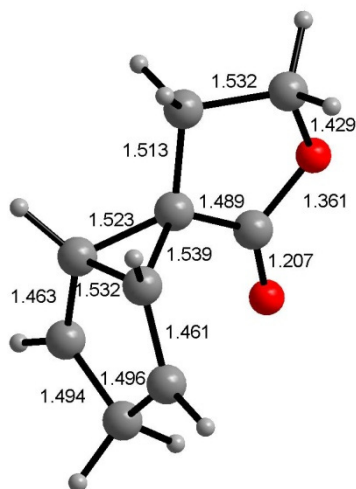

**BR2b**  
 $E_{\text{REL}} = 13.2 \text{ kcal/mol}$

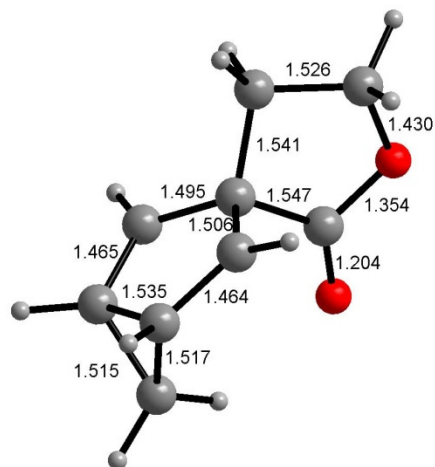

**BR3a**  
 $E_{\text{REL}} = 15.0 \text{ kcal/mol}$

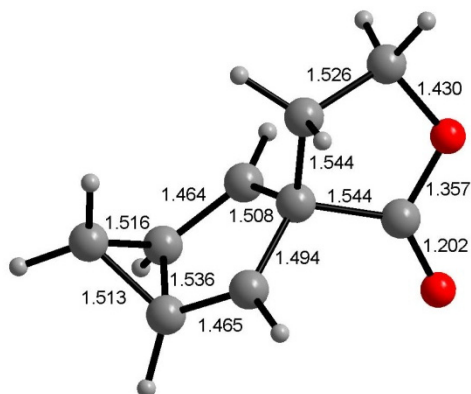

**BR3b**  
 $E_{\text{REL}} = 16.9 \text{ kcal/mol}$

|            |                                  |                                    |           |
|------------|----------------------------------|------------------------------------|-----------|
| <b>BR4</b> | $E = -498,737,1415 \text{ a.u.}$ | $ZPE = 106,89214 \text{ kcal/mol}$ |           |
| <b>C</b>   | 2.653967                         | -0.608247                          | -0.261815 |

|   |           |           |           |
|---|-----------|-----------|-----------|
| C | 1.552862  | -1.426673 | -0.079005 |
| C | 0.300433  | -0.947382 | 0.280626  |
| C | 0.070348  | 0.516048  | 0.526725  |
| C | 1.164468  | 1.385492  | -0.001139 |
| C | 2.559759  | 0.882662  | -0.140522 |
| C | -0.917926 | -1.790080 | 0.446297  |
| C | -1.993100 | -1.244748 | -0.486341 |
| O | -2.262409 | 0.137476  | -0.247846 |
| C | -1.291550 | 1.031153  | 0.032494  |
| O | -1.533702 | 2.211591  | -0.028339 |
| H | 3.619860  | -1.042244 | -0.502606 |
| H | 1.667420  | -2.503260 | -0.207871 |
| H | -0.027240 | 0.655955  | 1.628675  |
| H | 0.944263  | 2.437698  | -0.128783 |
| H | 3.182237  | 1.213279  | 0.715939  |
| H | 3.039222  | 1.356952  | -1.011725 |
| H | -1.296336 | -1.739147 | 1.480110  |
| H | -0.722484 | -2.842716 | 0.211331  |
| H | -2.951163 | -1.753204 | -0.347767 |
| H | -1.682459 | -1.365193 | -1.531741 |

**BR2a** E = -498,7209952 a.u. ZPE = 106,5157 kcal/mol

|   |           |           |           |
|---|-----------|-----------|-----------|
| C | -2.052976 | -0.196463 | -1.146336 |
| C | -0.884075 | -0.924124 | -0.674457 |
| C | 0.205648  | -0.071091 | -0.043265 |
| C | -0.838328 | -0.734646 | 0.858406  |
| C | -1.985124 | 0.086819  | 1.210283  |
| C | -2.708074 | 0.541007  | -0.020125 |
| C | 0.387104  | 1.410613  | -0.247200 |
| C | 1.882322  | 1.587118  | 0.075500  |
| O | 2.489688  | 0.295652  | -0.038474 |
| C | 1.556576  | -0.685928 | -0.007338 |
| O | 1.826458  | -1.862434 | 0.039579  |
| H | -2.467125 | -0.278835 | -2.141785 |
| H | -0.535741 | -1.845163 | -1.136803 |
| H | -0.455004 | -1.516666 | 1.509828  |
| H | -2.341622 | 0.244527  | 2.218981  |
| H | -2.670079 | 1.638759  | -0.154592 |
| H | -3.783836 | 0.304039  | 0.039675  |
| H | -0.245722 | 2.009307  | 0.418076  |
| H | 0.156427  | 1.691550  | -1.282114 |
| H | 2.036308  | 1.946202  | 1.099131  |
| H | 2.398776  | 2.260713  | -0.612046 |

**BR2b** E = -498,7153636 a.u. ZPE = 106,46785 kcal/mol

|   |           |           |           |
|---|-----------|-----------|-----------|
| C | 1.775378  | -0.143603 | 1.265725  |
| C | 0.756330  | -1.056627 | 0.754789  |
| C | -0.375739 | -0.501806 | -0.127728 |
| C | 0.891972  | -1.048498 | -0.770859 |
| C | 1.994458  | -0.139289 | -1.084417 |
| C | 2.550725  | 0.486812  | 0.153063  |
| C | -0.727504 | 0.944650  | -0.113872 |
| O | -2.076411 | 1.062749  | 0.022489  |
| C | -2.673303 | -0.208906 | 0.283147  |
| C | -1.685221 | -1.250069 | -0.252854 |
| H | 0.481814  | -1.953236 | 1.310098  |
| H | 0.726711  | -1.945127 | -1.368799 |
| H | 2.441354  | 1.582339  | 0.142013  |
| H | 3.632805  | 0.286984  | 0.255890  |
| O | -0.002483 | 1.905572  | -0.196148 |



|   |           |           |           |
|---|-----------|-----------|-----------|
| H | -3.648556 | -0.231846 | -0.208028 |
| H | -2.819226 | -0.311649 | 1.365339  |
| H | -1.714078 | -2.184156 | 0.318299  |
| H | -1.898518 | -1.485553 | -1.303426 |
| H | 2.000352  | -0.017066 | 2.316069  |
| H | 2.385928  | 0.016755  | -2.080146 |

**BR3a** E = -498,7130882 a.u. ZPE = 106,82345 kcal/mol

|   |           |           |           |
|---|-----------|-----------|-----------|
| C | -2.210115 | -0.397435 | 0.651112  |
| C | -0.878622 | -0.374092 | 1.262737  |
| C | 0.201681  | -0.386788 | 0.229089  |
| C | -0.538290 | -0.685765 | -1.048449 |
| C | -1.986441 | -0.587630 | -0.855289 |
| C | -2.519225 | 0.726023  | -0.316522 |
| C | 1.396997  | -1.322272 | 0.493271  |
| C | 2.497934  | -0.662121 | -0.330967 |
| O | 2.231848  | 0.740166  | -0.245087 |
| C | 0.934811  | 0.966666  | 0.069750  |
| O | 0.473442  | 2.074368  | 0.172728  |
| H | -3.042969 | -0.871250 | 1.165236  |
| H | -0.678338 | -0.265003 | 2.321179  |
| H | -0.044938 | -0.907020 | -1.987378 |
| H | -2.657510 | -1.197016 | -1.455629 |
| H | -3.570462 | 0.932464  | -0.503485 |
| H | -1.857907 | 1.588475  | -0.314557 |
| H | 1.197715  | -2.356808 | 0.201998  |
| H | 1.653710  | -1.295921 | 1.559252  |
| H | 2.458702  | -0.966733 | -1.384695 |
| H | 3.507298  | -0.836977 | 0.048567  |

**BR3b** E = -498,7096806 a.u. ZPE = 106,57487 kcal/mol

|   |           |           |           |
|---|-----------|-----------|-----------|
| C | -2.213243 | 0.583032  | -0.465937 |
| C | -0.893350 | 0.552777  | -1.101029 |
| C | 0.132261  | -0.069859 | -0.210343 |
| C | -0.597243 | -0.271278 | 1.093719  |
| C | -2.019581 | 0.051169  | 0.961939  |
| C | -2.799950 | -0.751434 | -0.059875 |
| C | 1.340767  | 0.853892  | 0.053755  |
| O | 2.440908  | 0.089323  | 0.267936  |
| C | 2.136130  | -1.299818 | 0.116209  |
| C | 0.860992  | -1.331298 | -0.721325 |
| H | -2.903515 | 1.396130  | -0.675661 |
| H | -0.638701 | 1.056364  | -2.024095 |
| H | -0.103932 | -0.536158 | 2.020865  |
| H | -2.568718 | 0.468481  | 1.802365  |
| H | -3.878276 | -0.798768 | 0.071657  |
| H | -2.343881 | -1.655254 | -0.459649 |
| O | 1.359825  | 2.054658  | 0.092147  |
| H | 1.980754  | -1.742242 | 1.108450  |
| H | 2.994411  | -1.783096 | -0.356322 |
| H | 1.100048  | -1.215275 | -1.785465 |
| H | 0.275244  | -2.245127 | -0.585475 |

**Figure S3: Geometries and energies of P1, P2**

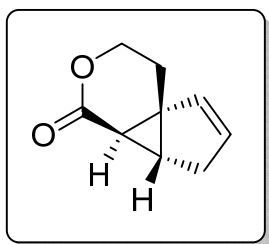

**P1a**

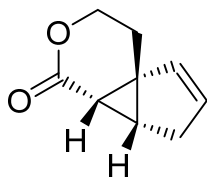

**P1b**

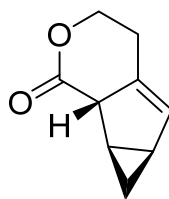

**P2a**

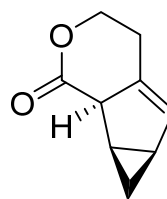

**P2b**

$E_{REL} = 0.0$  kcal/mol

$E_{REL} = 28.9$  kcal/mol

$E_{REL} = 3.0$  kcal/mol

$E_{REL} = 1.7$  kcal/mol

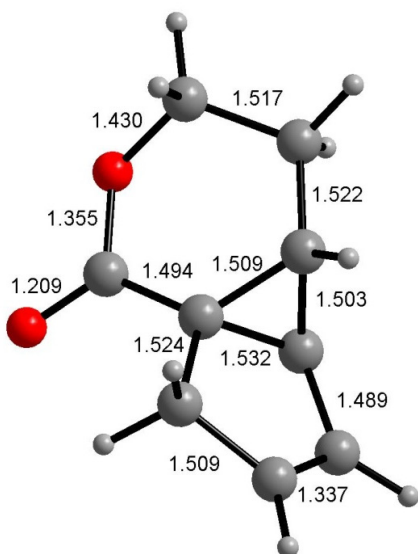

**P1a**

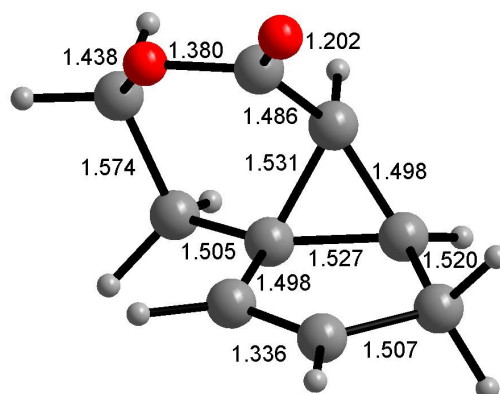

**P1b**

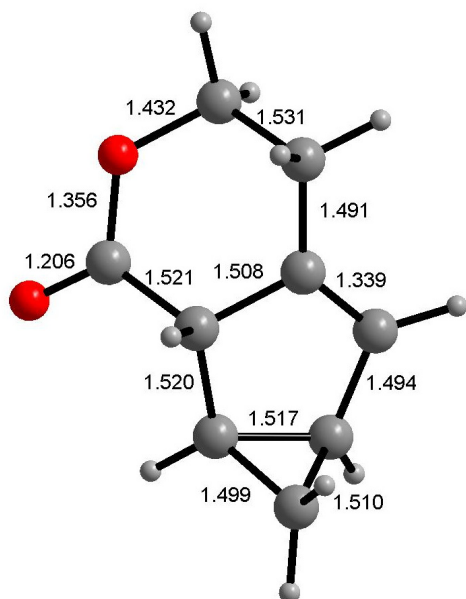

**P2a**

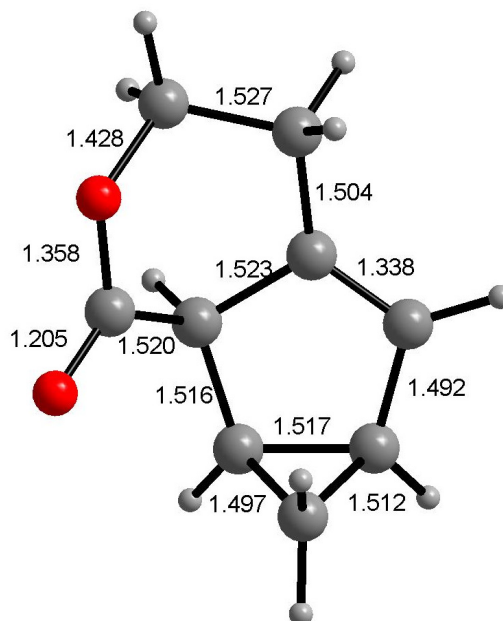

**P2b**

**P1a**  $E = -498,8108113$  a.u.  $ZPE = 110,07418$  kcal/mol

|   |           |           |           |
|---|-----------|-----------|-----------|
| C | -2.331243 | -0.732336 | -0.671843 |
| C | -2.686134 | 0.083939  | 0.326390  |

|   |           |           |           |
|---|-----------|-----------|-----------|
| C | -0.854210 | -0.756875 | -0.859310 |
| C | -0.308597 | 0.217706  | 0.189715  |
| C | -1.507758 | 0.826852  | 0.905415  |
| C | -0.051713 | -1.265059 | 0.305514  |
| H | -0.409032 | -0.823203 | -1.851097 |
| C | 0.800064  | 1.143821  | -0.190790 |
| H | -1.437392 | 0.721516  | 1.996486  |
| C | 1.385508  | -1.700936 | 0.061273  |
| H | -0.611569 | -1.787190 | 1.081086  |
| H | -3.699130 | 0.216213  | 0.696167  |
| C | 2.325684  | -0.576666 | 0.453808  |
| O | 2.042704  | 0.611942  | -0.288650 |
| O | 0.621479  | 2.311877  | -0.445083 |
| H | 1.543933  | -1.945051 | -0.996878 |
| H | 1.621201  | -2.600442 | 0.640203  |
| H | 3.370117  | -0.813112 | 0.235867  |
| H | 2.237715  | -0.359015 | 1.527052  |
| H | -3.007408 | -1.343852 | -1.262346 |
| H | -1.551502 | 1.900917  | 0.682291  |

**P1b**      E = -498,7640902 a.u.      ZPE = 109,68662 kcal/mol

|   |           |           |           |
|---|-----------|-----------|-----------|
| C | -2.331243 | -0.732336 | -0.671843 |
| C | -2.686134 | 0.083939  | 0.326390  |
| C | -0.854210 | -0.756875 | -0.859310 |
| C | -0.308597 | 0.217706  | 0.189715  |
| C | -1.507758 | 0.826852  | 0.905415  |
| C | -0.051713 | -1.265059 | 0.305514  |
| H | -0.409032 | -0.823203 | -1.851097 |
| C | 0.800064  | 1.143821  | -0.190790 |
| H | -1.437392 | 0.721516  | 1.996486  |
| C | 1.385508  | -1.700936 | 0.061273  |
| H | -0.611569 | -1.787190 | 1.081086  |
| H | -3.699130 | 0.216213  | 0.696167  |
| C | 2.325684  | -0.576666 | 0.453808  |
| O | 2.042704  | 0.611942  | -0.288650 |
| O | 0.621479  | 2.311877  | -0.445083 |
| H | 1.543933  | -1.945051 | -0.996878 |
| H | 1.621201  | -2.600442 | 0.640203  |
| H | 3.370117  | -0.813112 | 0.235867  |
| H | 2.237715  | -0.359015 | 1.527052  |
| H | -3.007408 | -1.343852 | -1.262346 |
| H | -1.551502 | 1.900917  | 0.682291  |

**P2a**      E = -498,8059516 a.u.      ZPE = 109,98435 kcal/mol

|   |           |           |           |
|---|-----------|-----------|-----------|
| C | -2.331243 | -0.732336 | -0.671843 |
| C | -2.686134 | 0.083939  | 0.326390  |
| C | -0.854210 | -0.756875 | -0.859310 |
| C | -0.308597 | 0.217706  | 0.189715  |
| C | -1.507758 | 0.826852  | 0.905415  |
| C | -0.051713 | -1.265059 | 0.305514  |
| H | -0.409032 | -0.823203 | -1.851097 |
| C | 0.800064  | 1.143821  | -0.190790 |
| H | -1.437392 | 0.721516  | 1.996486  |
| C | 1.385508  | -1.700936 | 0.061273  |
| H | -0.611569 | -1.787190 | 1.081086  |
| H | -3.699130 | 0.216213  | 0.696167  |
| C | 2.325684  | -0.576666 | 0.453808  |
| O | 2.042704  | 0.611942  | -0.288650 |
| O | 0.621479  | 2.311877  | -0.445083 |
| H | 1.543933  | -1.945051 | -0.996878 |
| H | 1.621201  | -2.600442 | 0.640203  |

|   |           |           |           |
|---|-----------|-----------|-----------|
| H | 3.370117  | -0.813112 | 0.235867  |
| H | 2.237715  | -0.359015 | 1.527052  |
| H | -3.007408 | -1.343852 | -1.262346 |
| H | -1.551502 | 1.900917  | 0.682291  |

**P2b**     E = -498,8080405 a.u.     ZPE = 110,07525 kcal/mol

|   |           |           |           |
|---|-----------|-----------|-----------|
| C | -2.331243 | -0.732336 | -0.671843 |
| C | -2.686134 | 0.083939  | 0.326390  |
| C | -0.854210 | -0.756875 | -0.859310 |
| C | -0.308597 | 0.217706  | 0.189715  |
| C | -1.507758 | 0.826852  | 0.905415  |
| C | -0.051713 | -1.265059 | 0.305514  |
| H | -0.409032 | -0.823203 | -1.851097 |
| C | 0.800064  | 1.143821  | -0.190790 |
| H | -1.437392 | 0.721516  | 1.996486  |
| C | 1.385508  | -1.700936 | 0.061273  |
| H | -0.611569 | -1.787190 | 1.081086  |
| H | -3.699130 | 0.216213  | 0.696167  |
| C | 2.325684  | -0.576666 | 0.453808  |
| O | 2.042704  | 0.611942  | -0.288650 |
| O | 0.621479  | 2.311877  | -0.445083 |
| H | 1.543933  | -1.945051 | -0.996878 |
| H | 1.621201  | -2.600442 | 0.640203  |
| H | 3.370117  | -0.813112 | 0.235867  |
| H | 2.237715  | -0.359015 | 1.527052  |
| H | -3.007408 | -1.343852 | -1.262346 |
| H | -1.551502 | 1.900917  | 0.682291  |

## 2. Photochemical Setup (Figure S4)

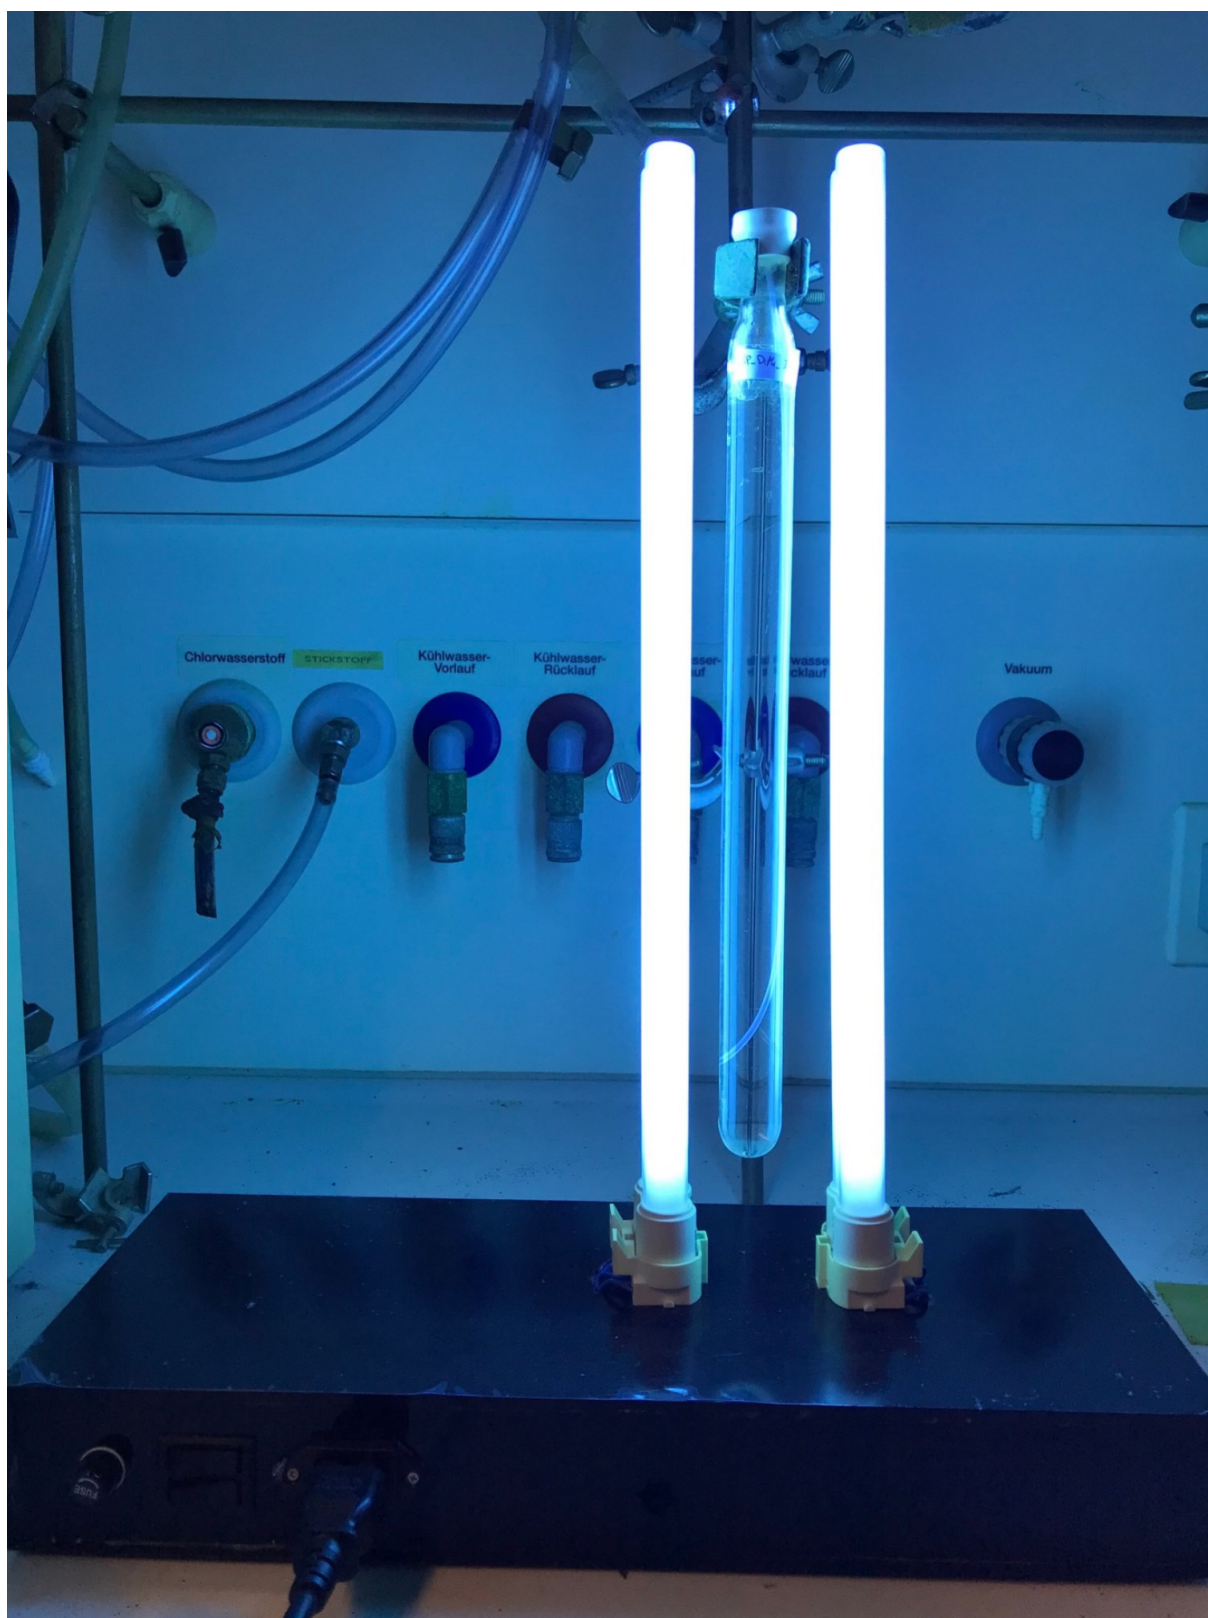

### 3. NMR Spectra

#### 3.1. Side product 12a

$^1\text{H}$  NMR spectrum (500 MHz,  $\text{CDCl}_3$ ) of 12a

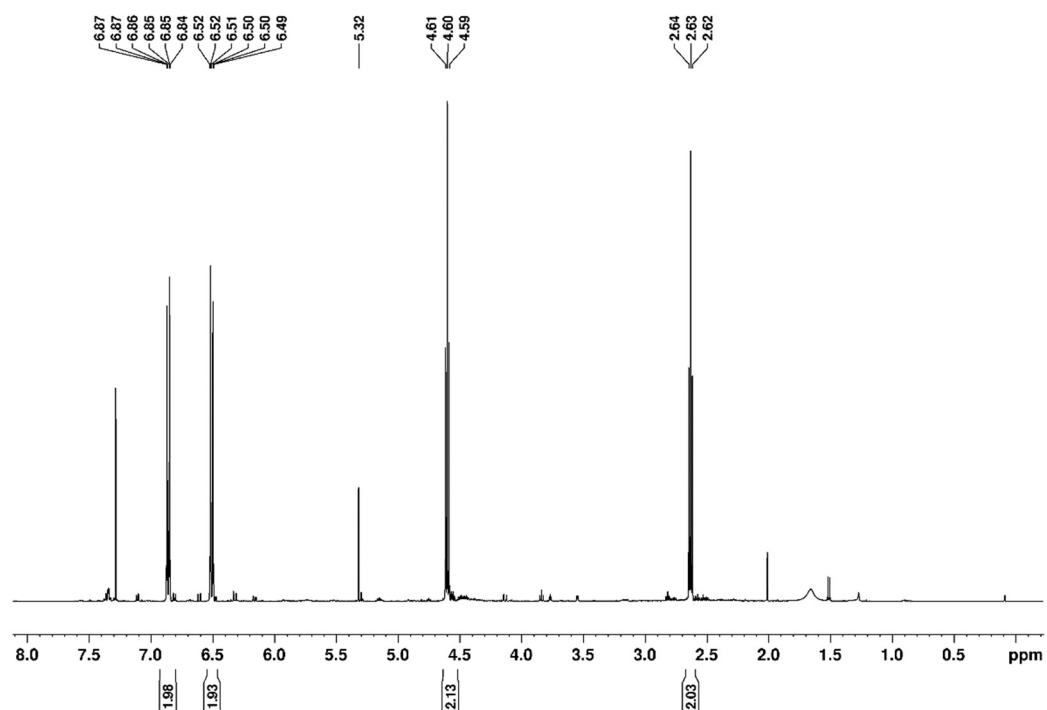

$^{13}\text{C}$  NMR spectrum (125 MHz)

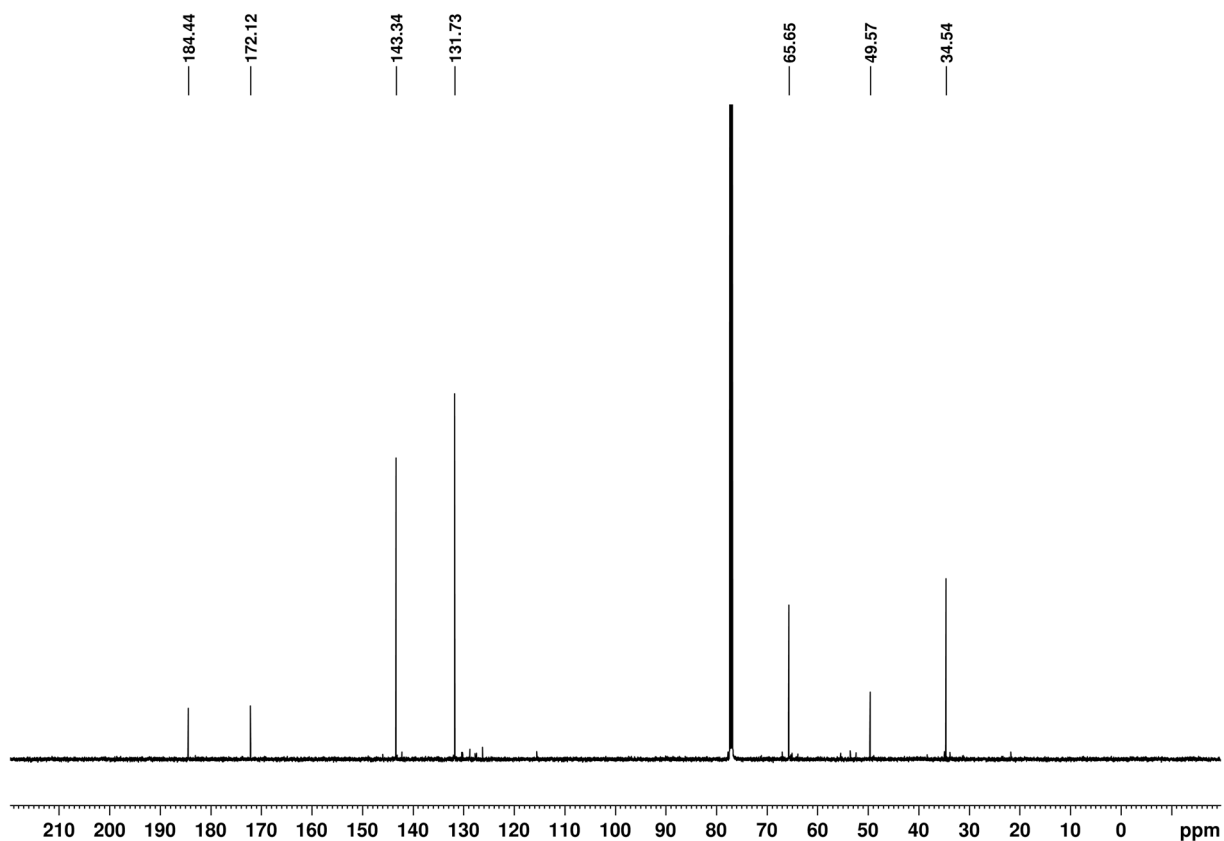

### 3.2. Oxa-Di- $\pi$ -Methane Rearrangement Products 13

$^1\text{H}$  NMR spectrum (500 MHz,  $\text{CDCl}_3$ ) of 13a

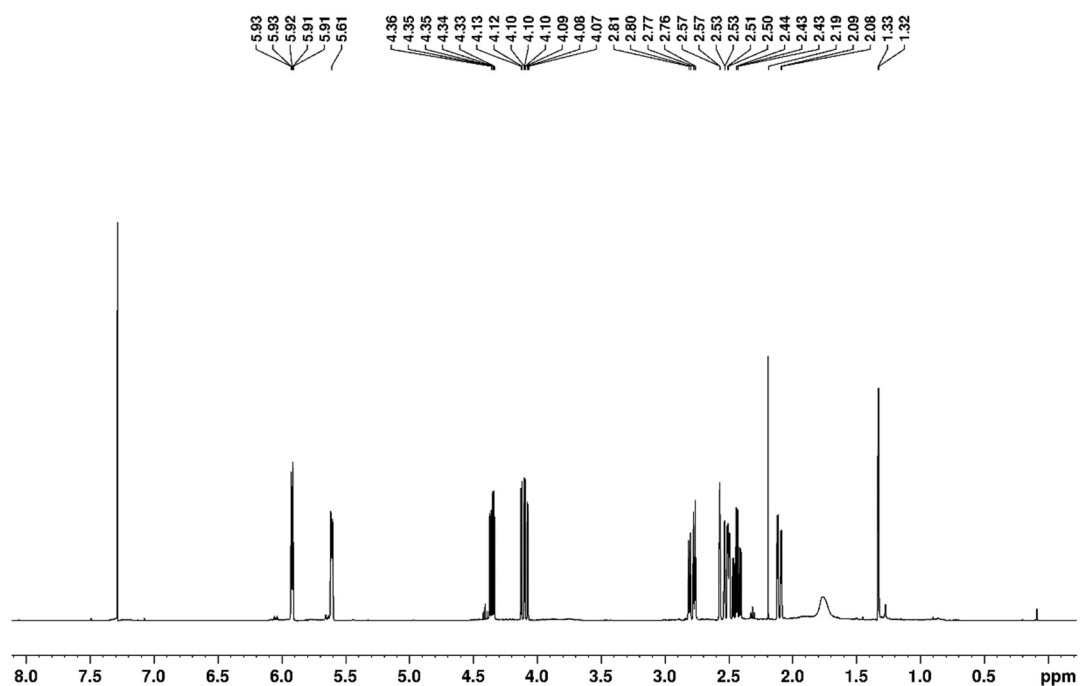

$^{13}\text{C}$  NMR spectrum (125 MHz)

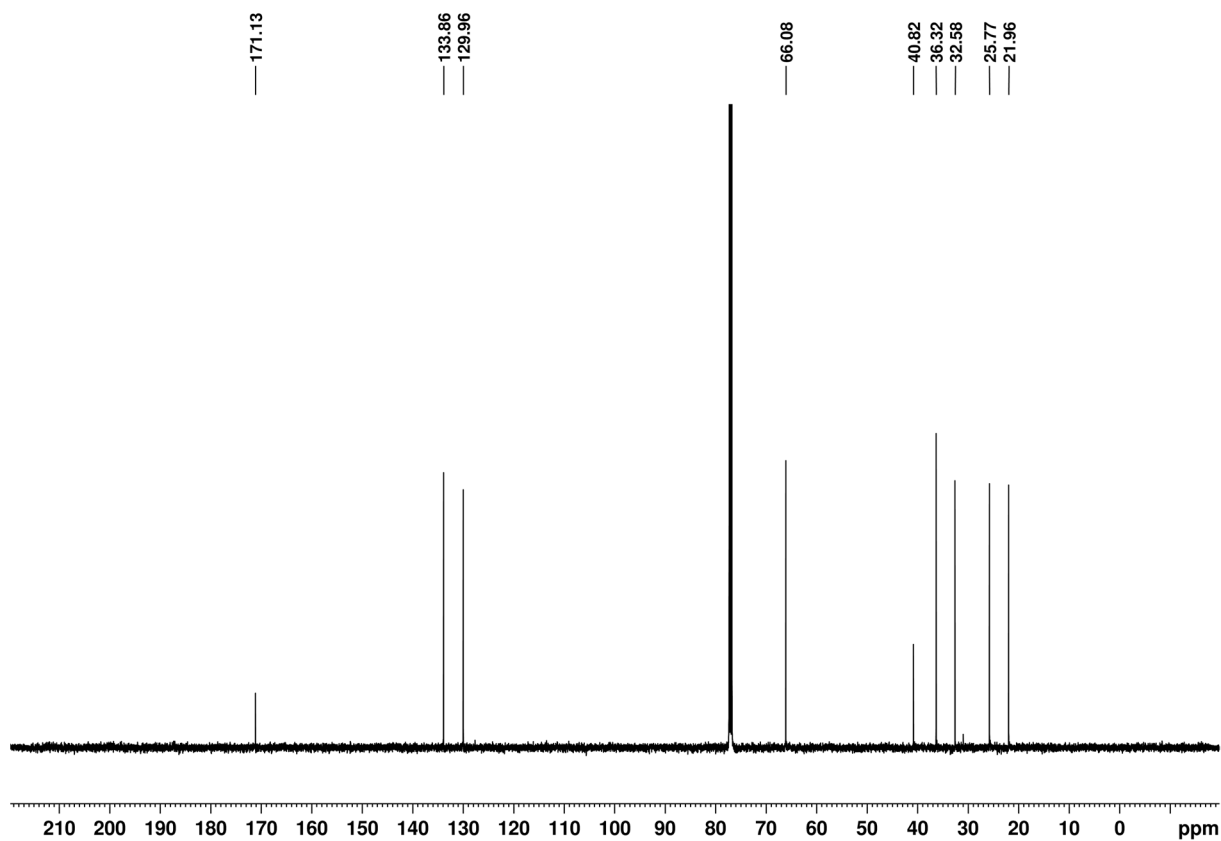

# NOESY of 13a

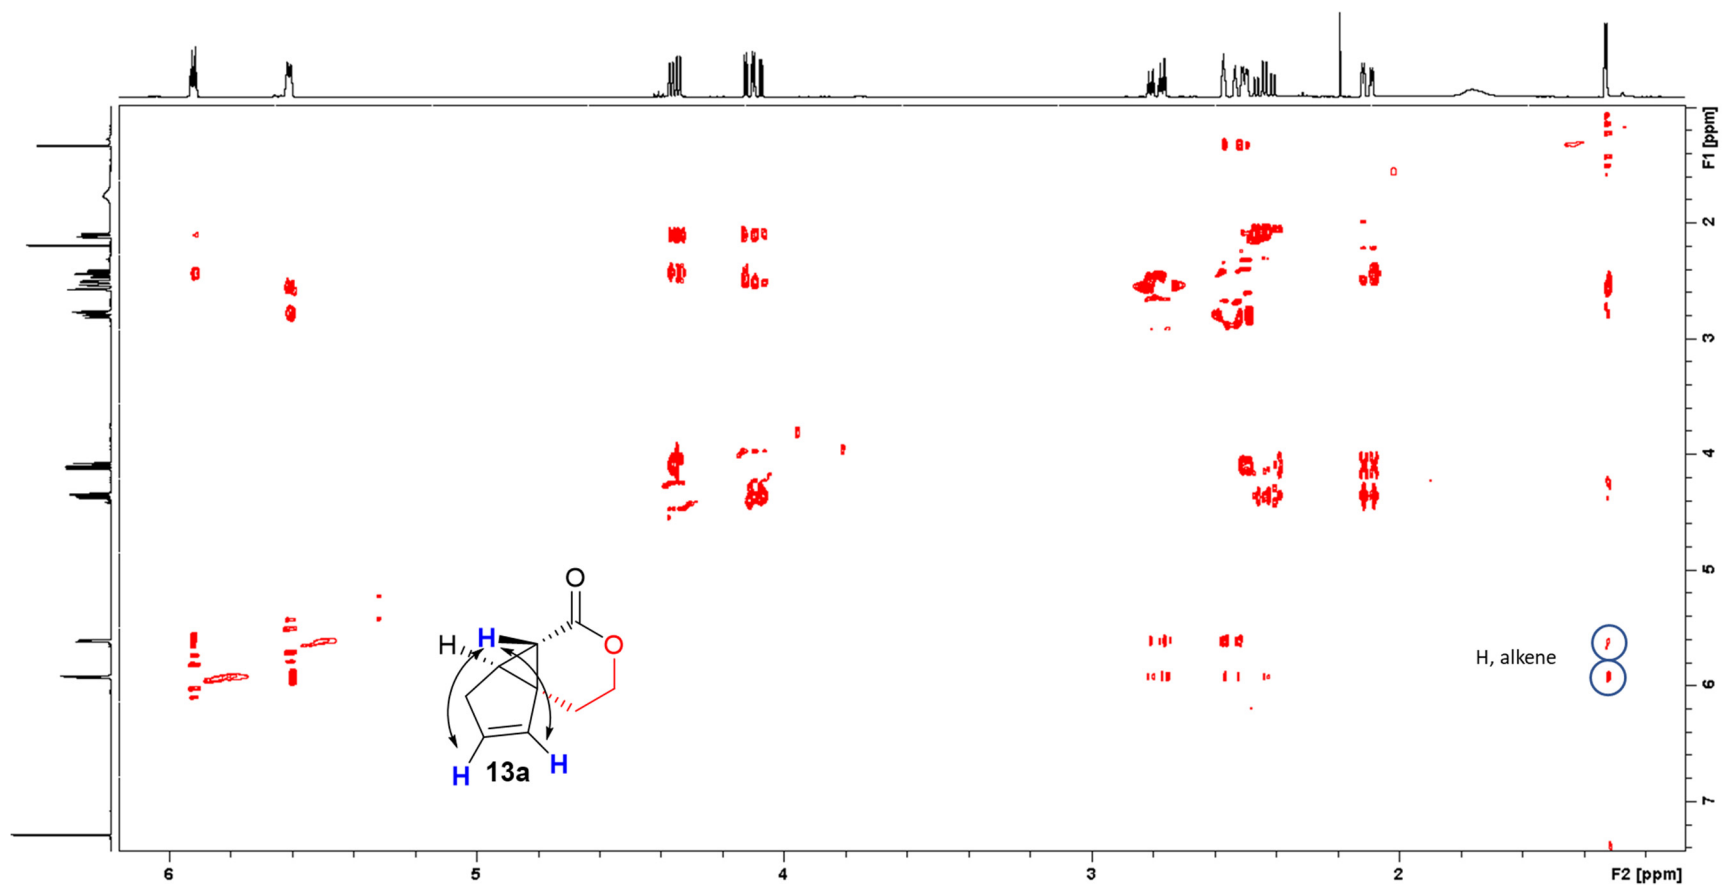



$^1\text{H}$  NMR spectrum (500 MHz,  $\text{CDCl}_3$ ) of 13ba

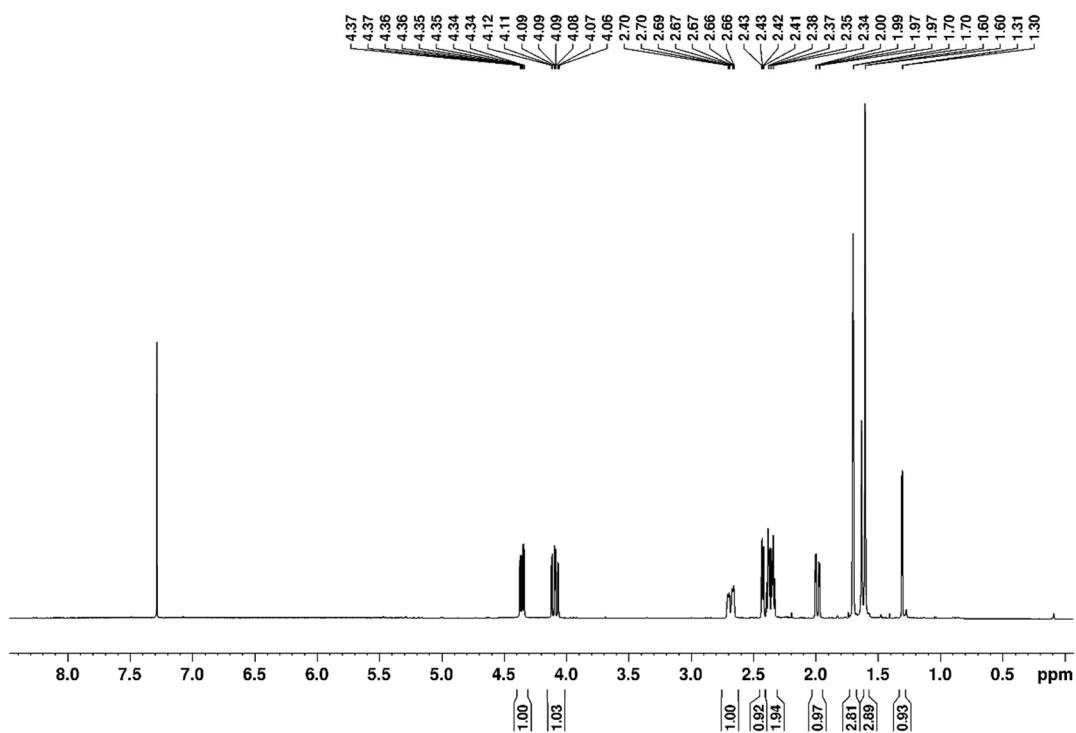

$^{13}\text{C}$  NMR spectrum (125 MHz)

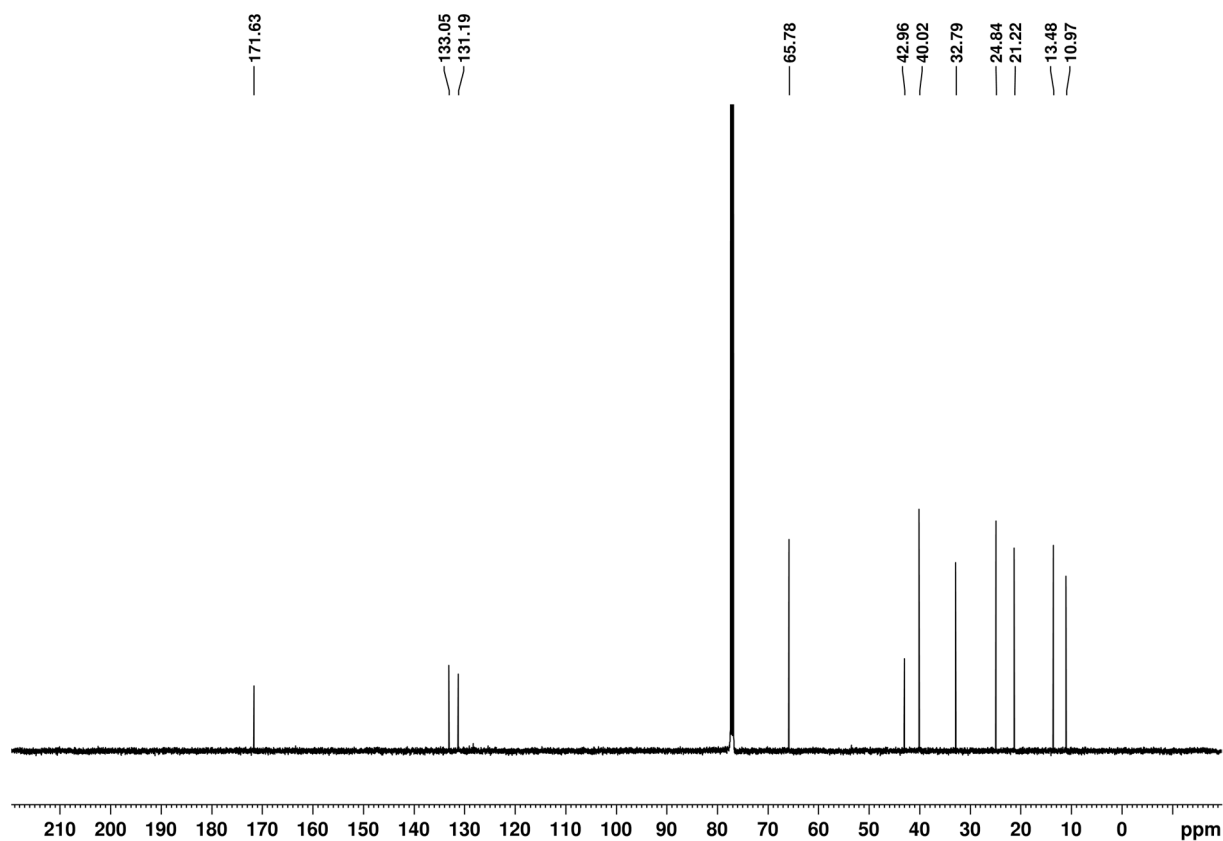

$^1\text{H}$  NMR spectrum (500 MHz,  $\text{CDCl}_3$ ) of 13bb

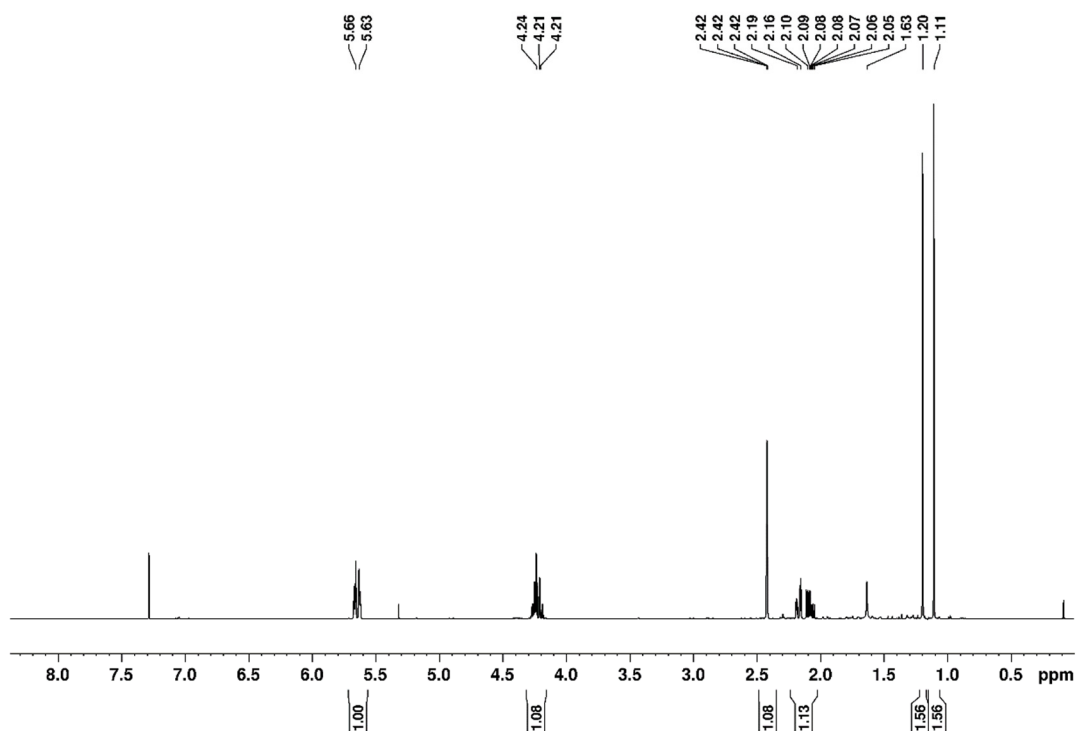

$^{13}\text{C}$  NMR spectrum (125 MHz)

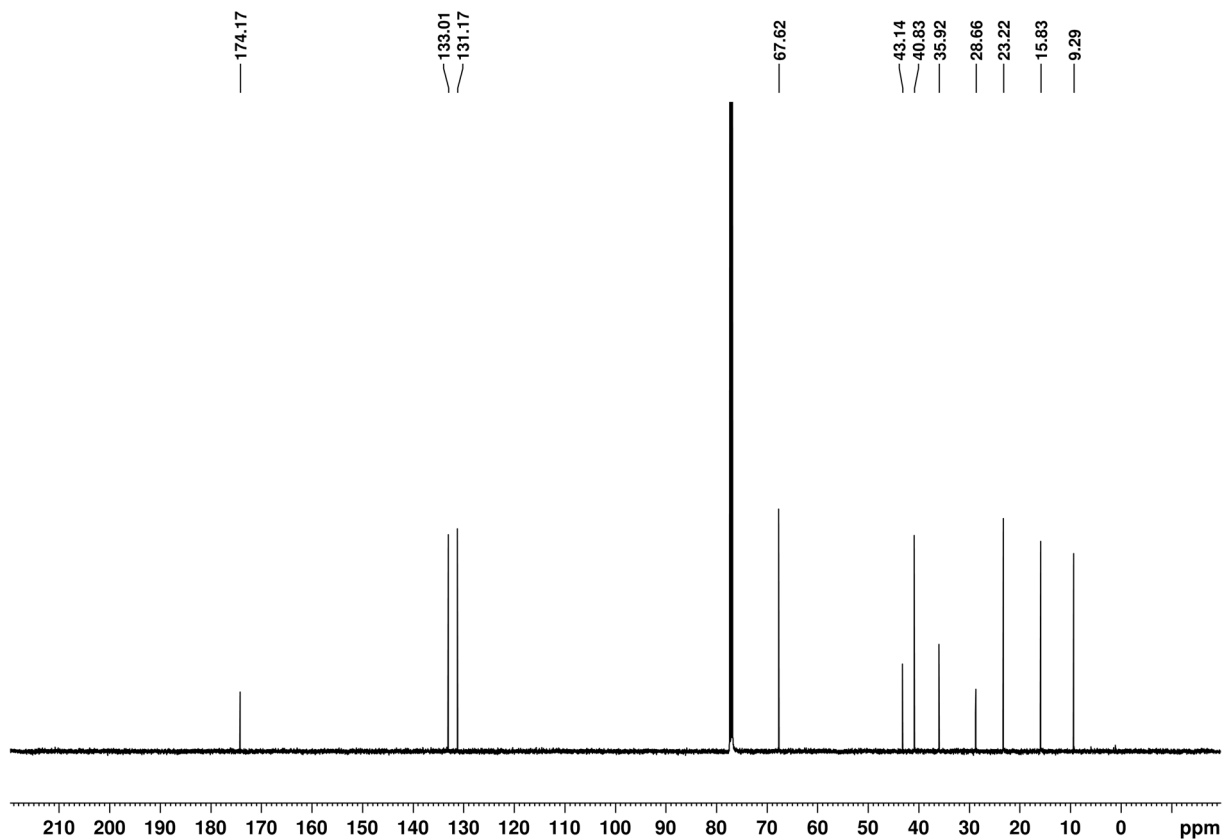

<sup>1</sup>H NMR spectrum (500 MHz, CDCl<sub>3</sub>) of 13c

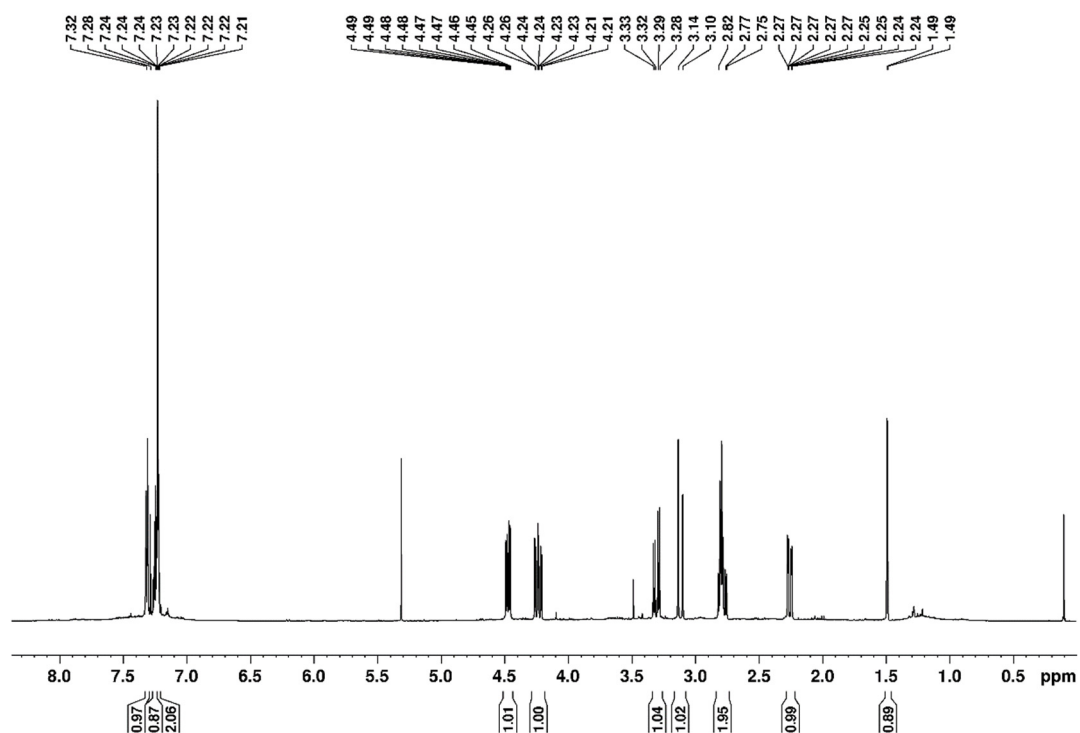

<sup>13</sup>C NMR spectrum (125 MHz)

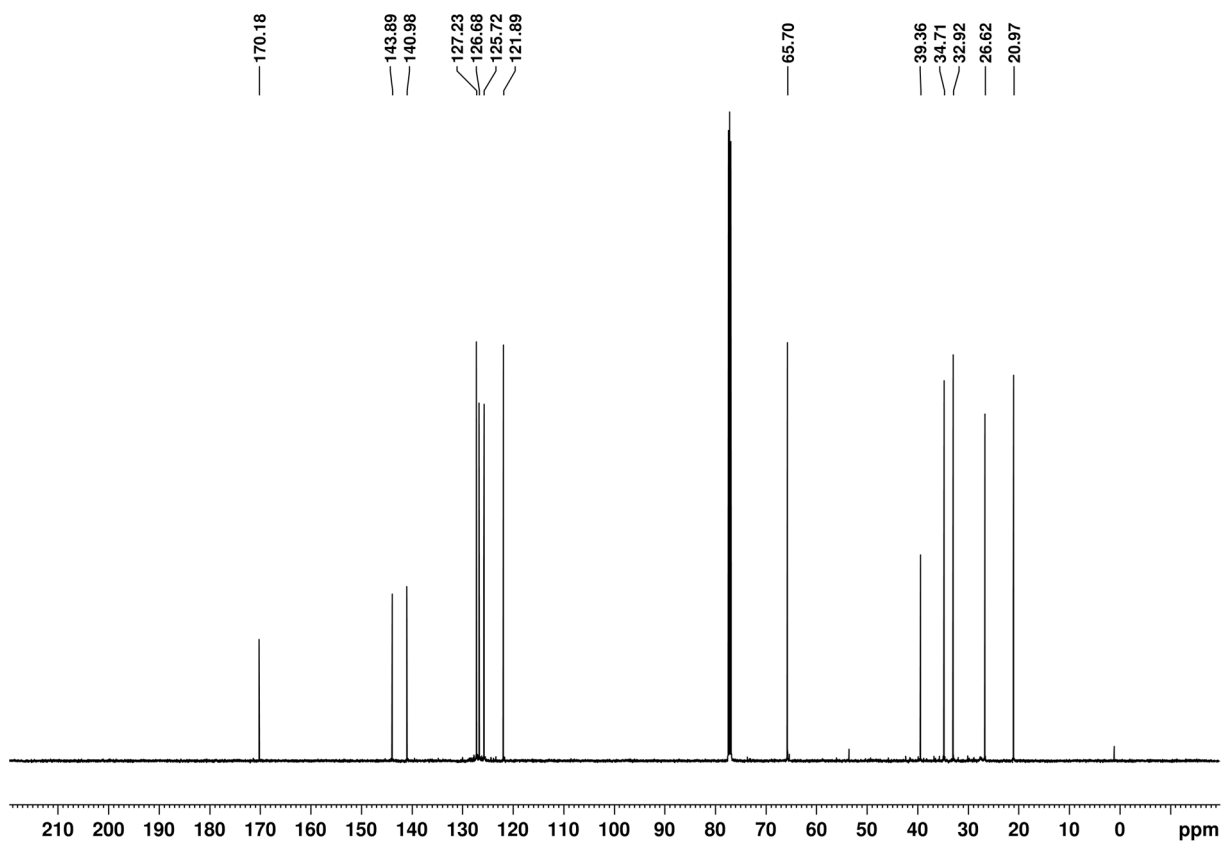

### 3.3. Products 20 and 26 from Reactions with Benzaldehyde (18)

<sup>1</sup>H NMR spectrum (500 MHz, CDCl<sub>3</sub>) of *trans*-20a

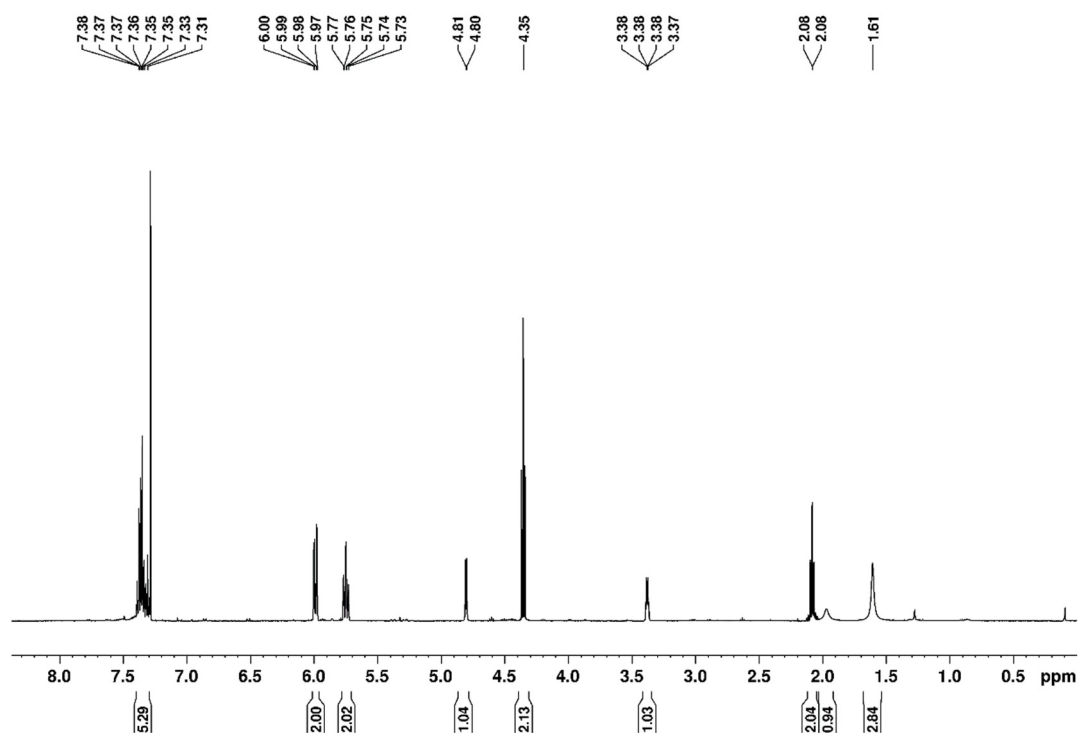

<sup>13</sup>C NMR spectrum (125 MHz)

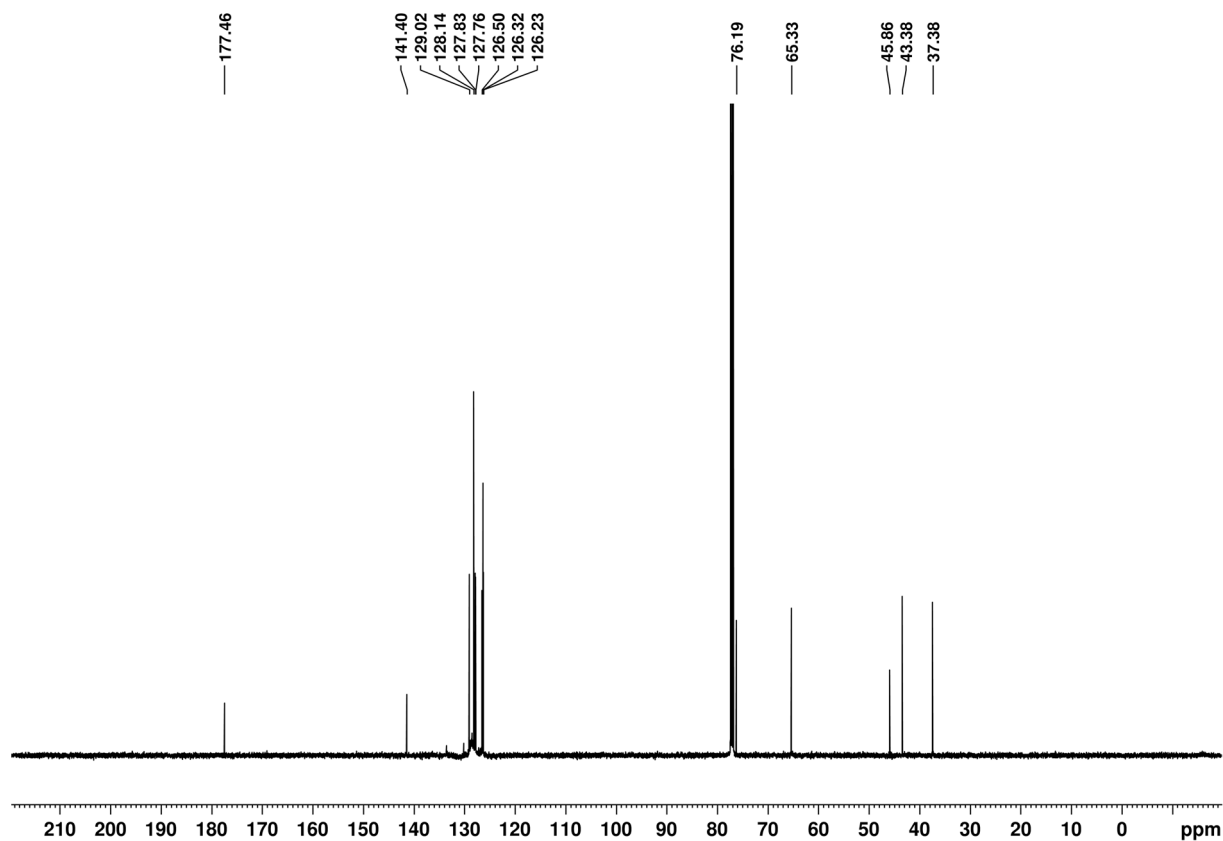

# NOESY of *trans*-20a

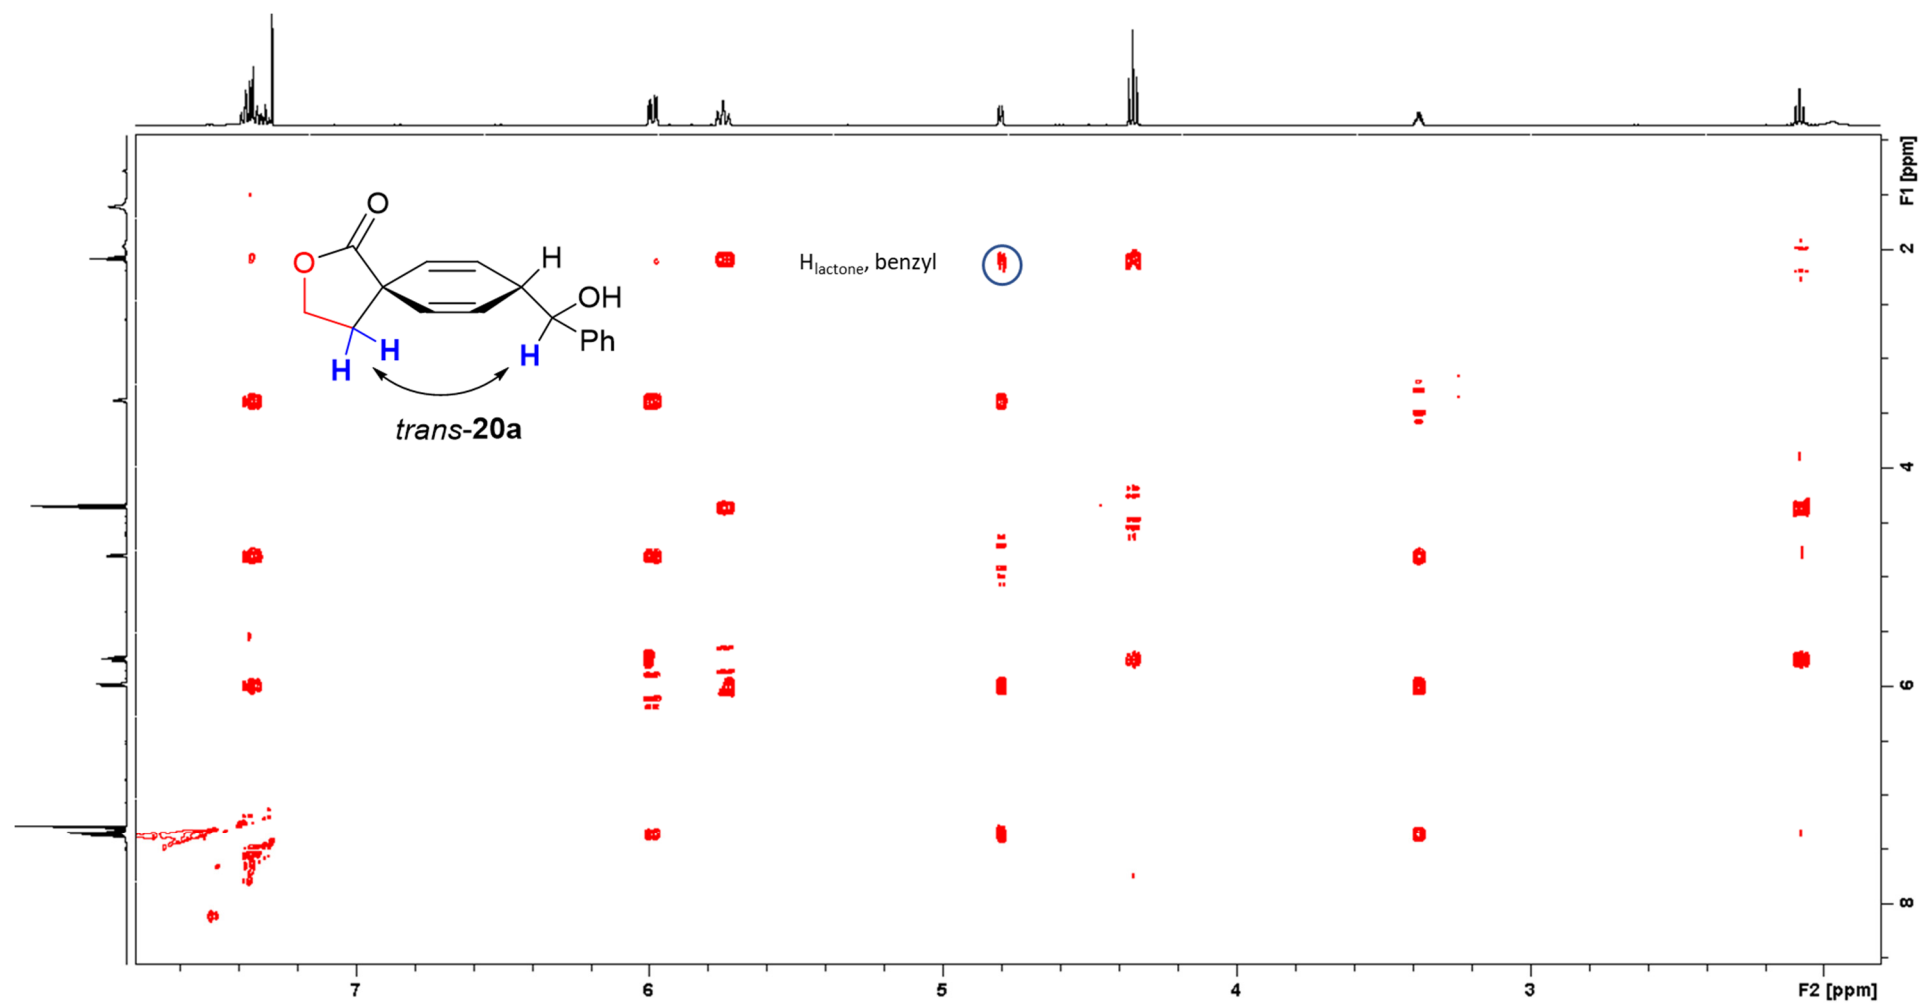

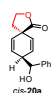

<sup>1</sup>H NMR spectrum (500 MHz, CDCl<sub>3</sub>) of *cis*-20a

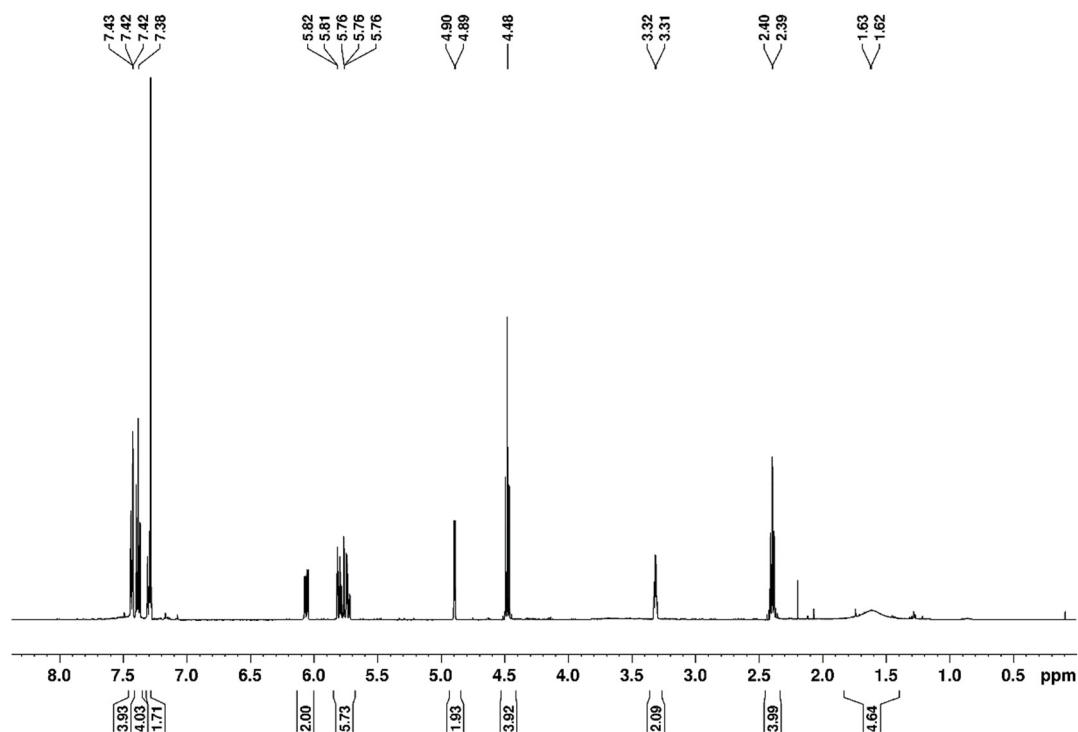

<sup>13</sup>C NMR spectrum (125 MHz)

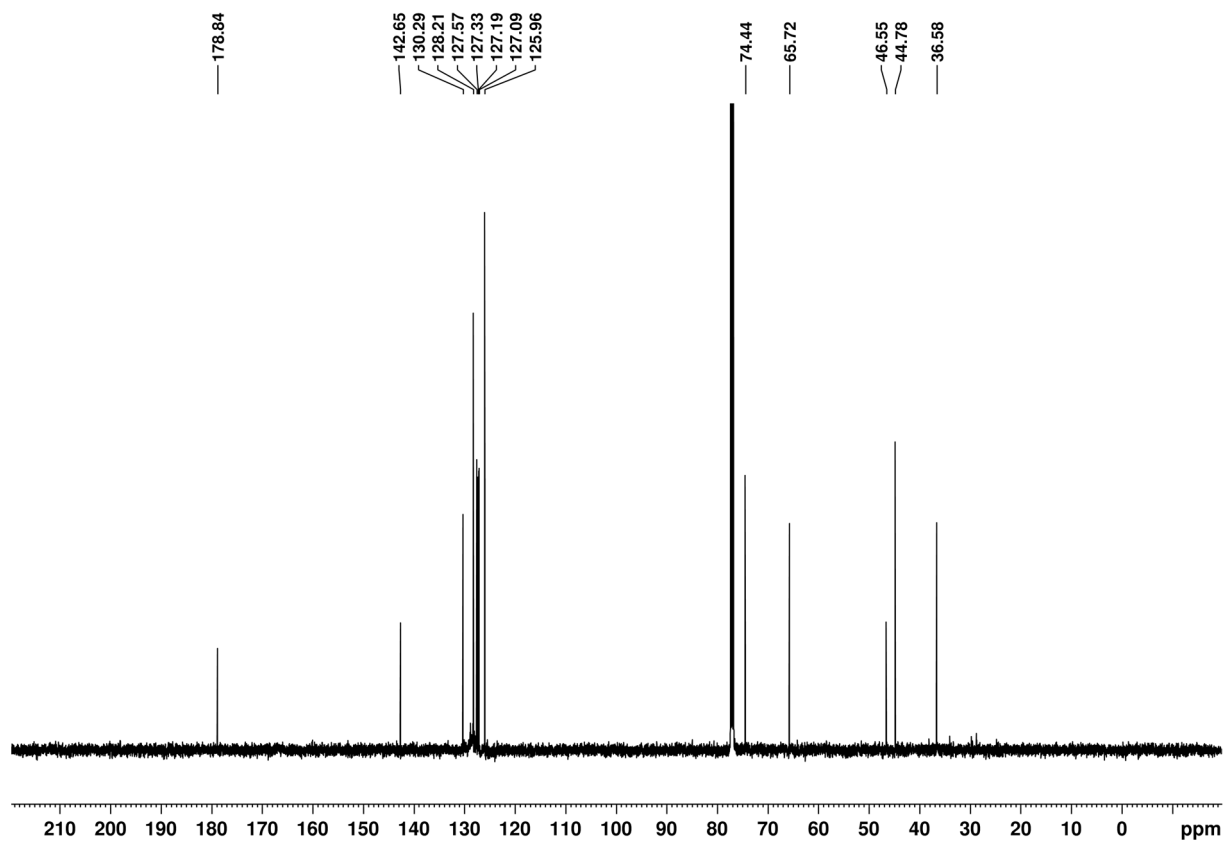

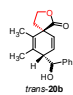

$^1\text{H}$  NMR spectrum (500 MHz,  $\text{CDCl}_3$ ) of *trans*-20b

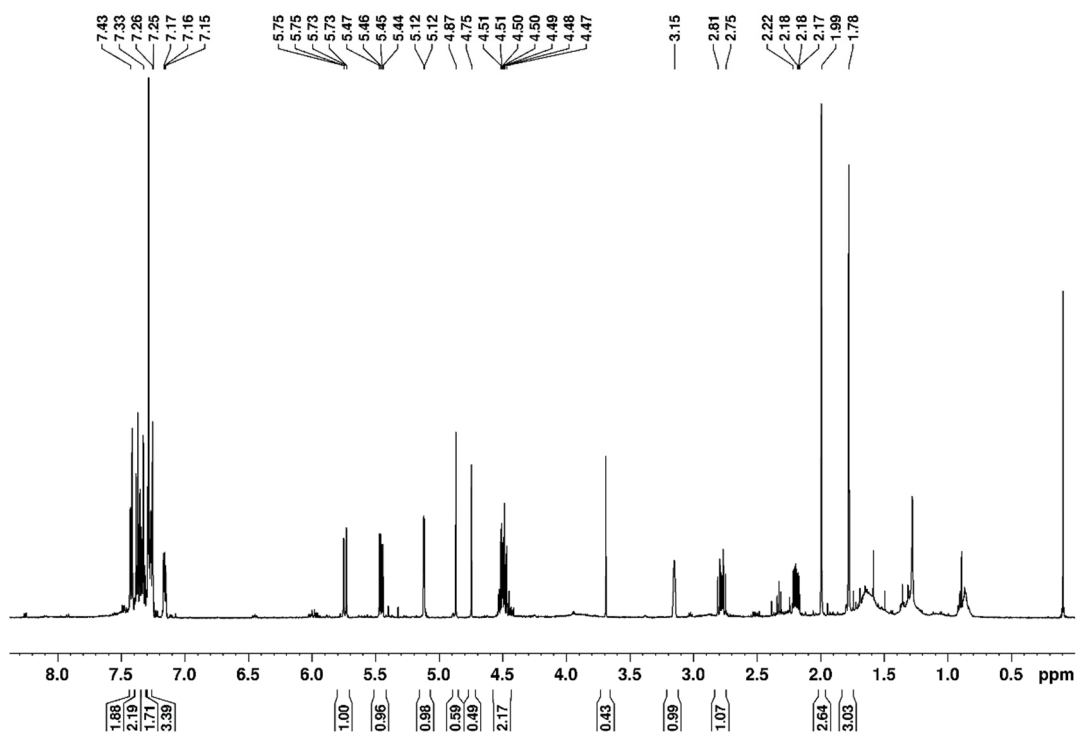

$^{13}\text{C}$  NMR spectrum (125 MHz)

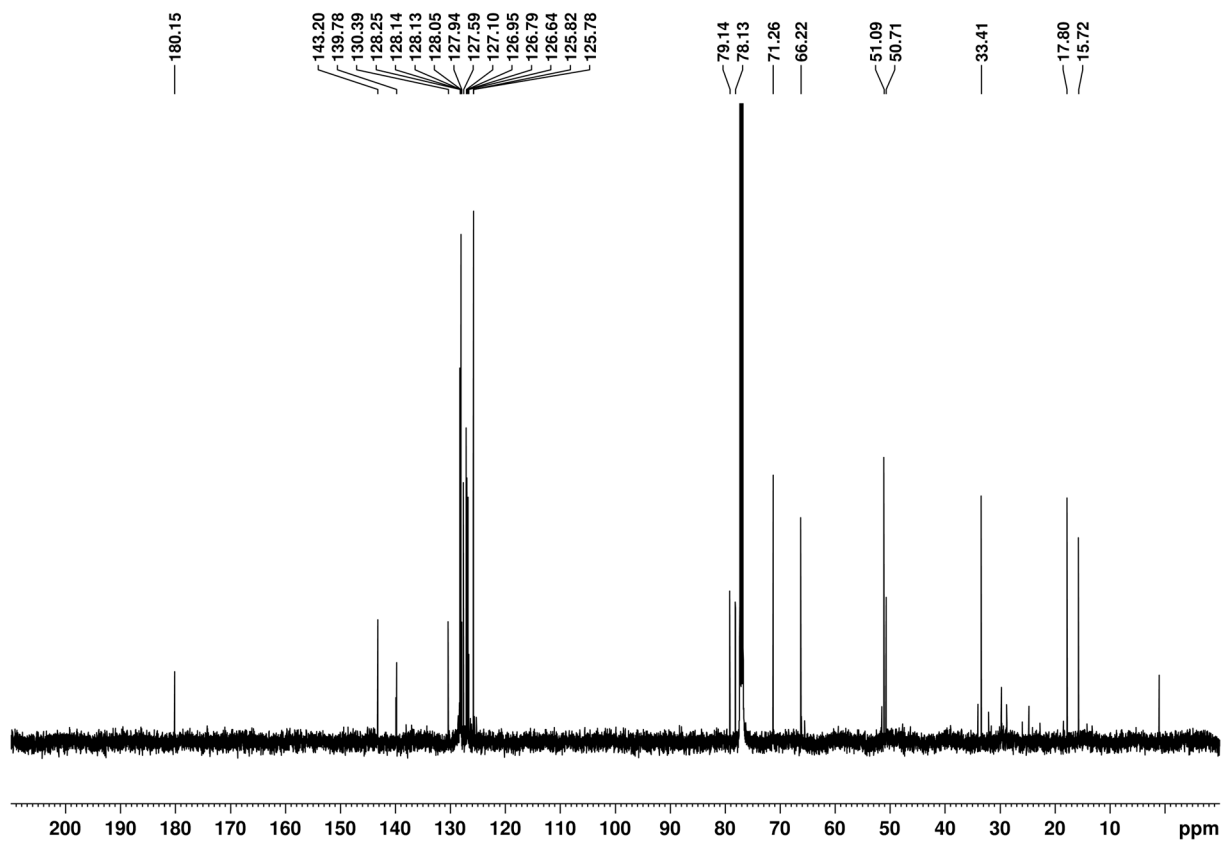

**$^1\text{H}$  NMR spectrum (500 MHz,  $\text{CDCl}_3$ ) of *cis*-20b**

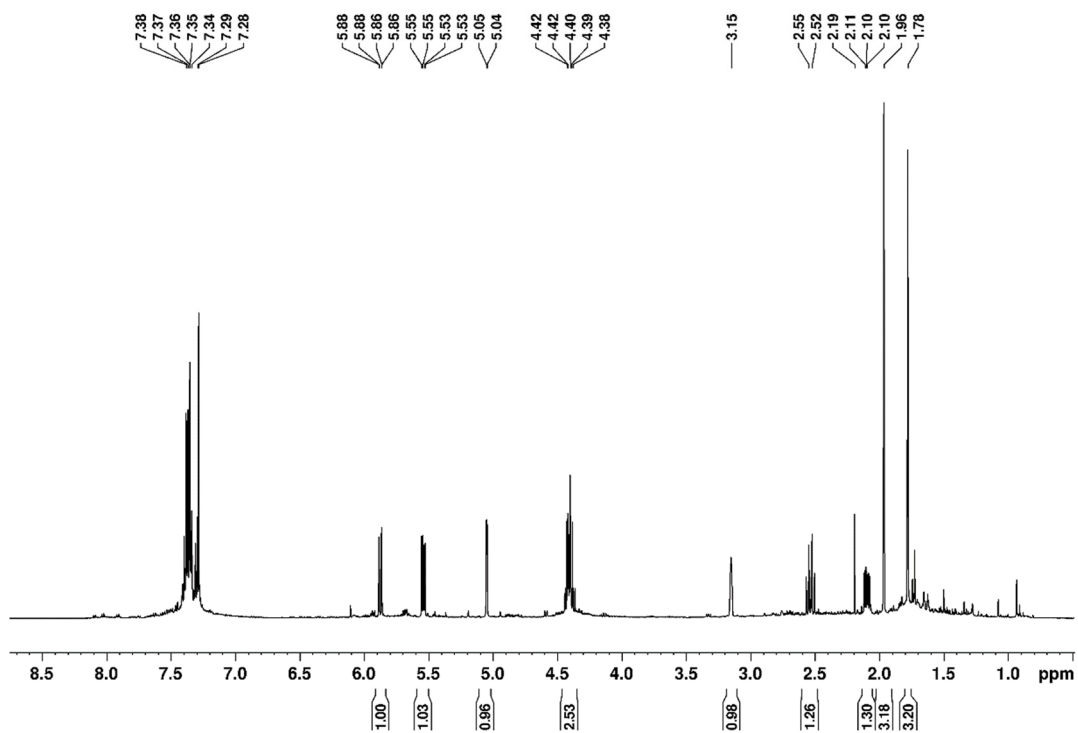

**$^{13}\text{C}$  NMR spectrum (125 MHz)**

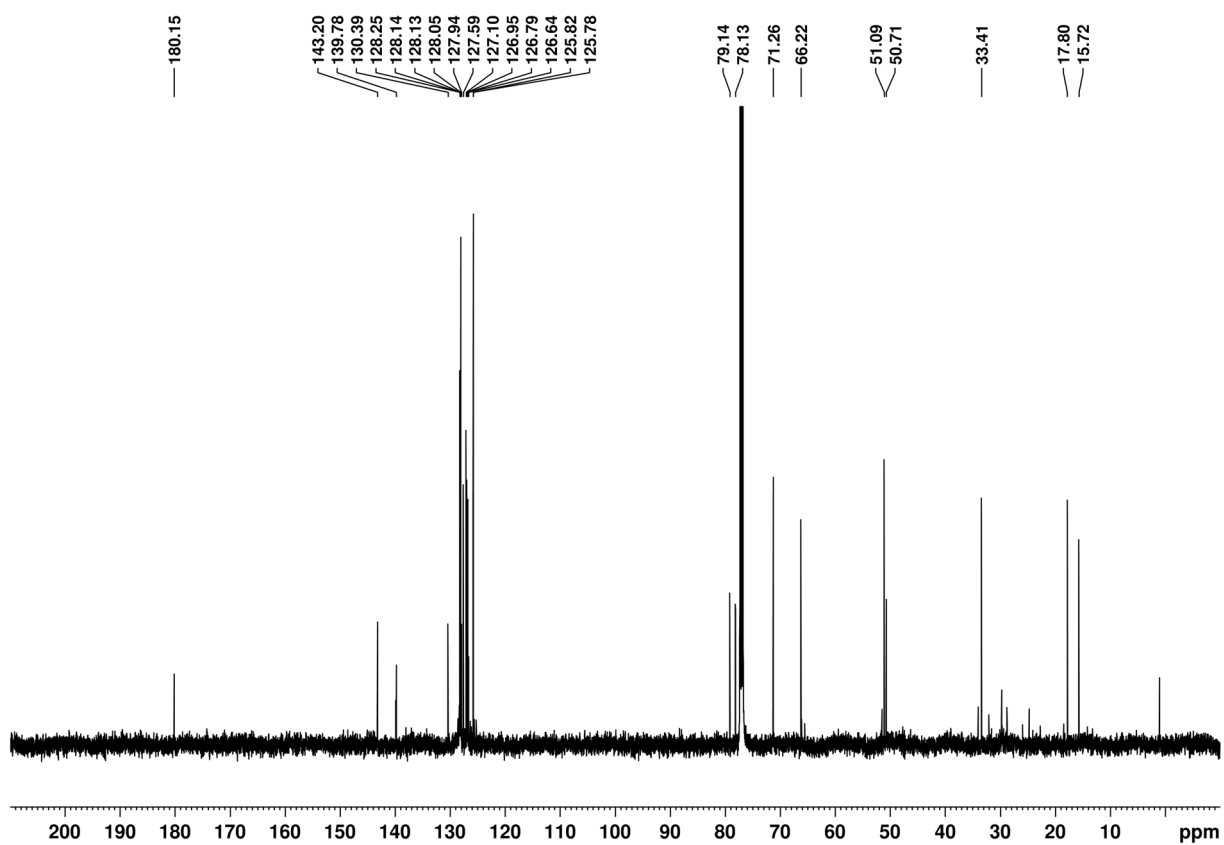



<sup>1</sup>H NMR spectrum (500 MHz, CDCl<sub>3</sub>) of 26ba

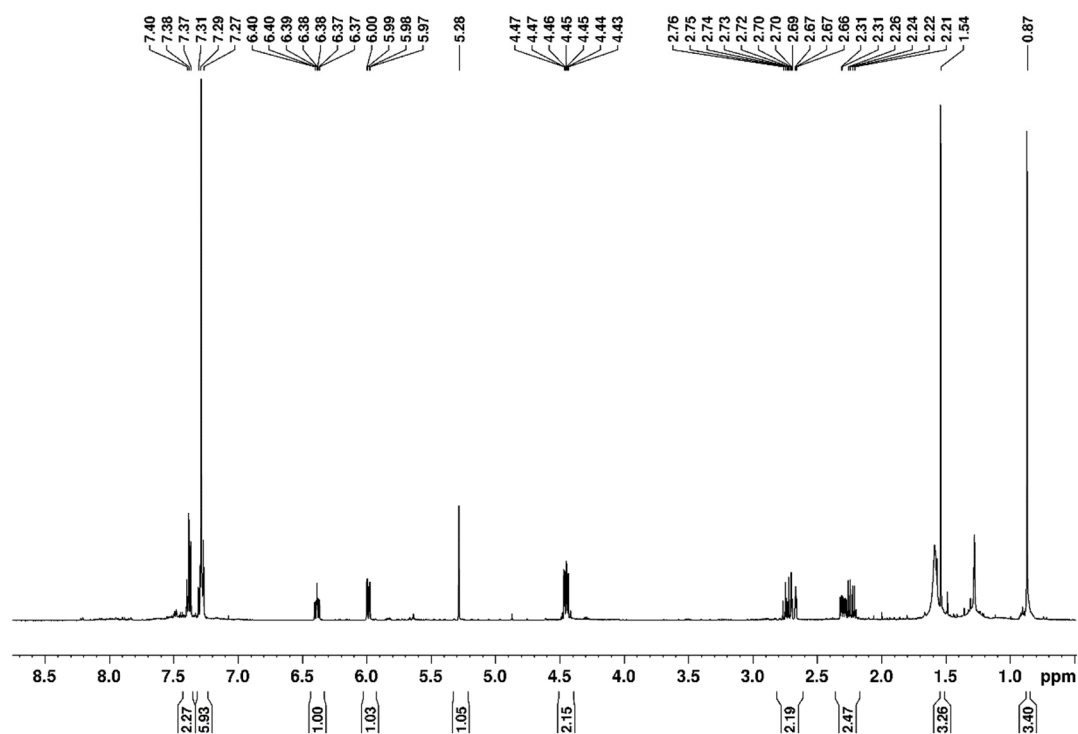

<sup>13</sup>C NMR spectrum (125 MHz)

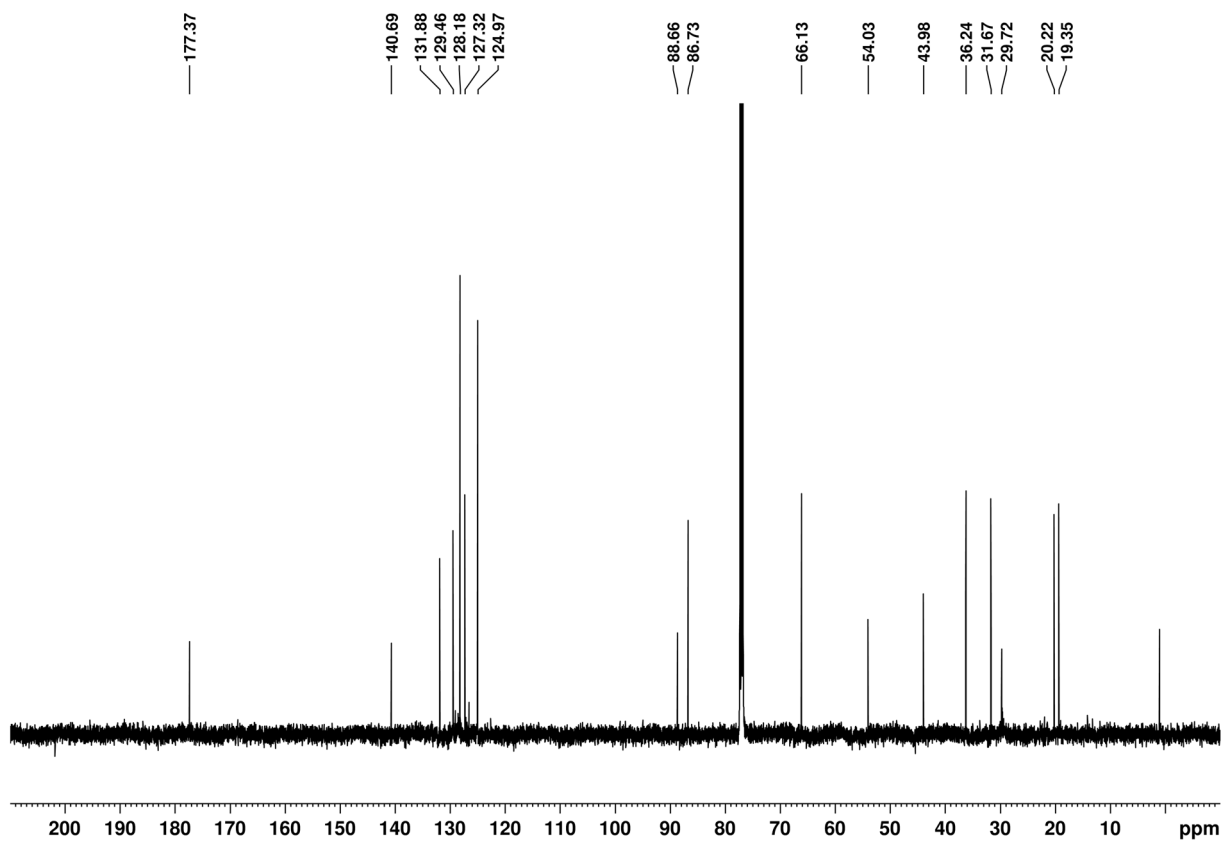

# NOESY of 26ba

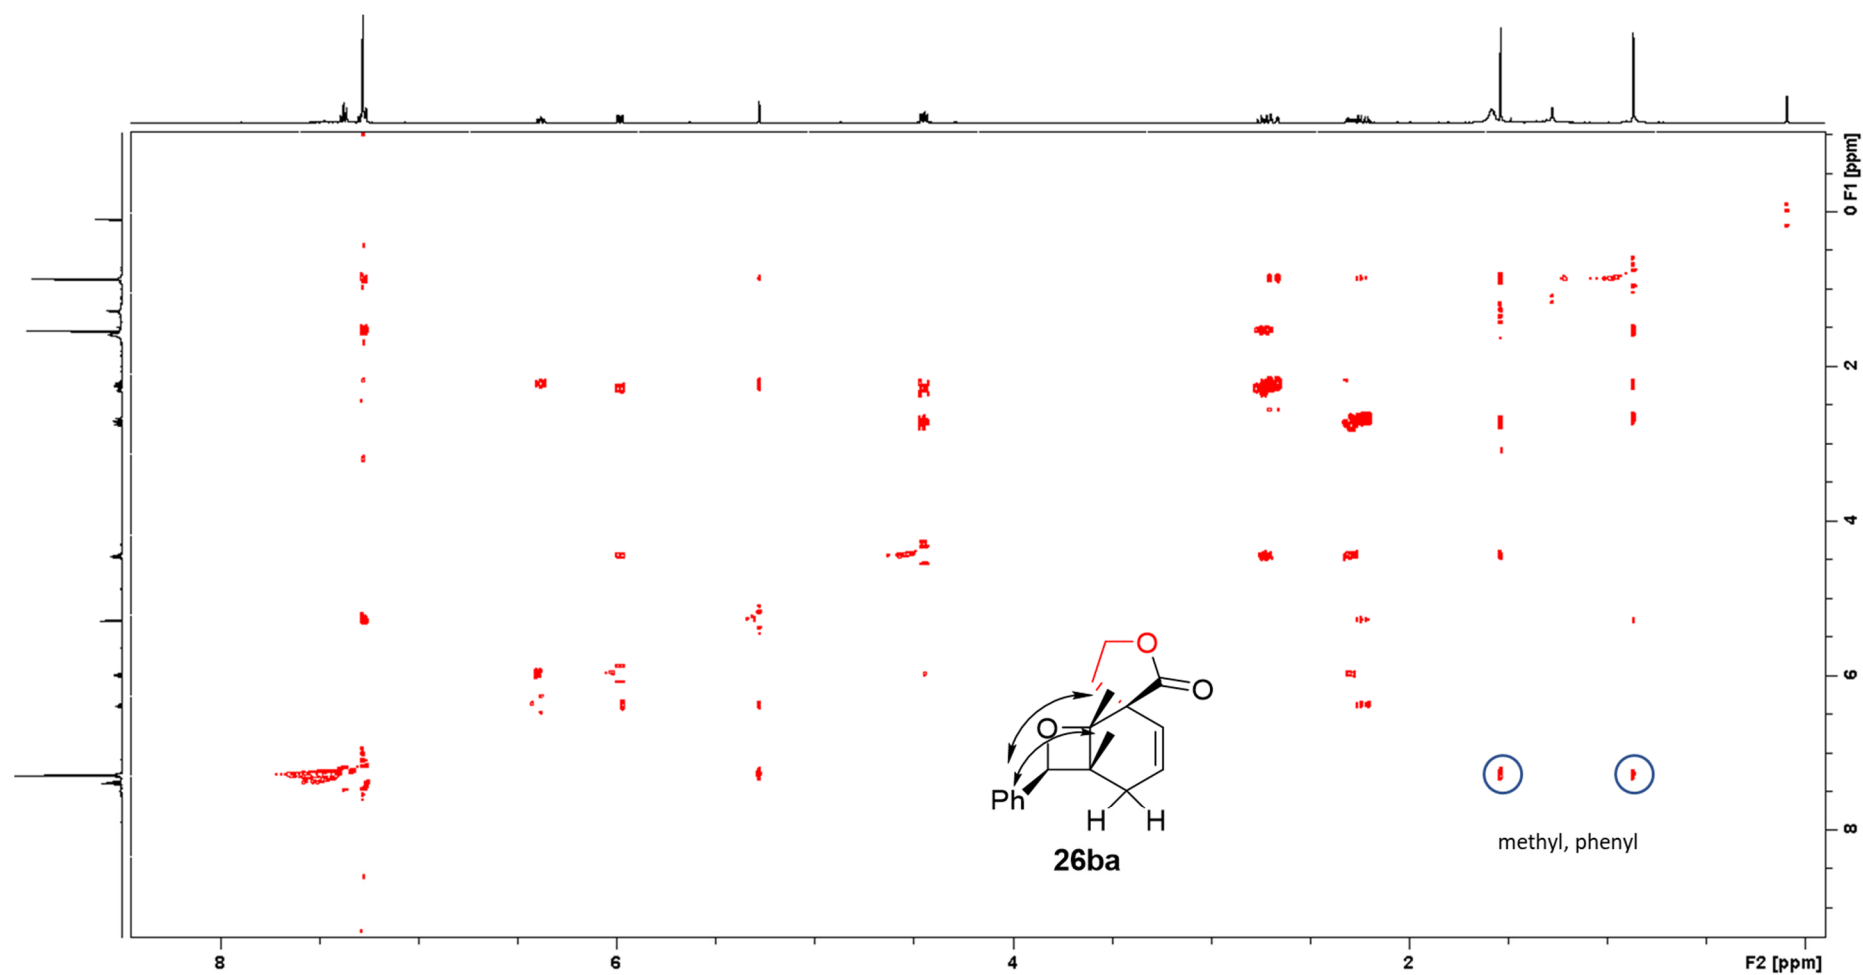

**$^1\text{H}$  NMR spectrum (500 MHz,  $\text{CDCl}_3$ ) of 26bb**

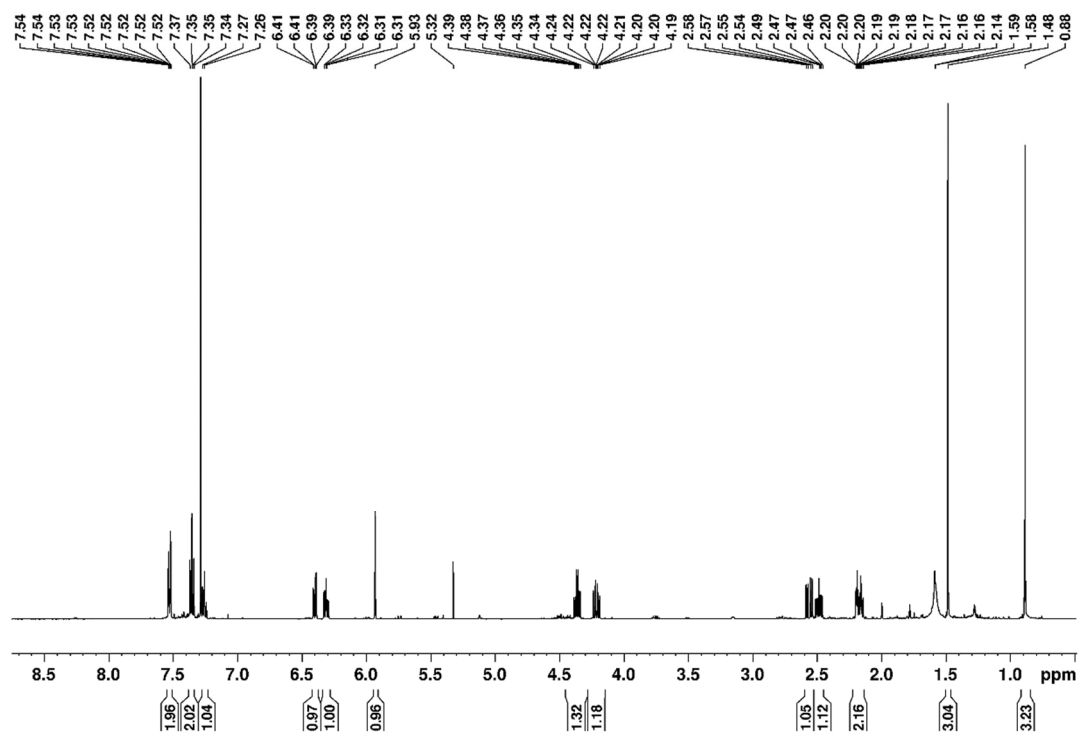

**$^{13}\text{C}$  NMR spectrum (125 MHz)**

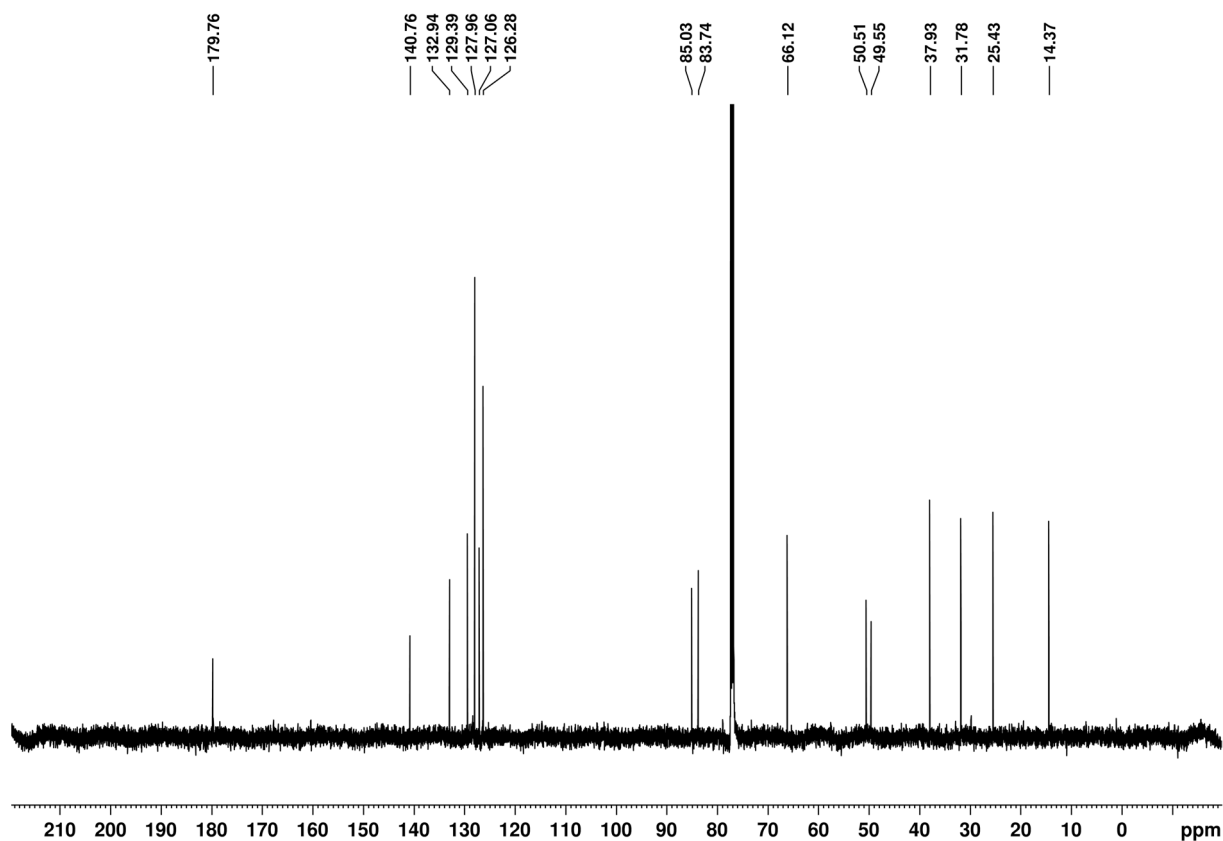

# NOESY of 26bb

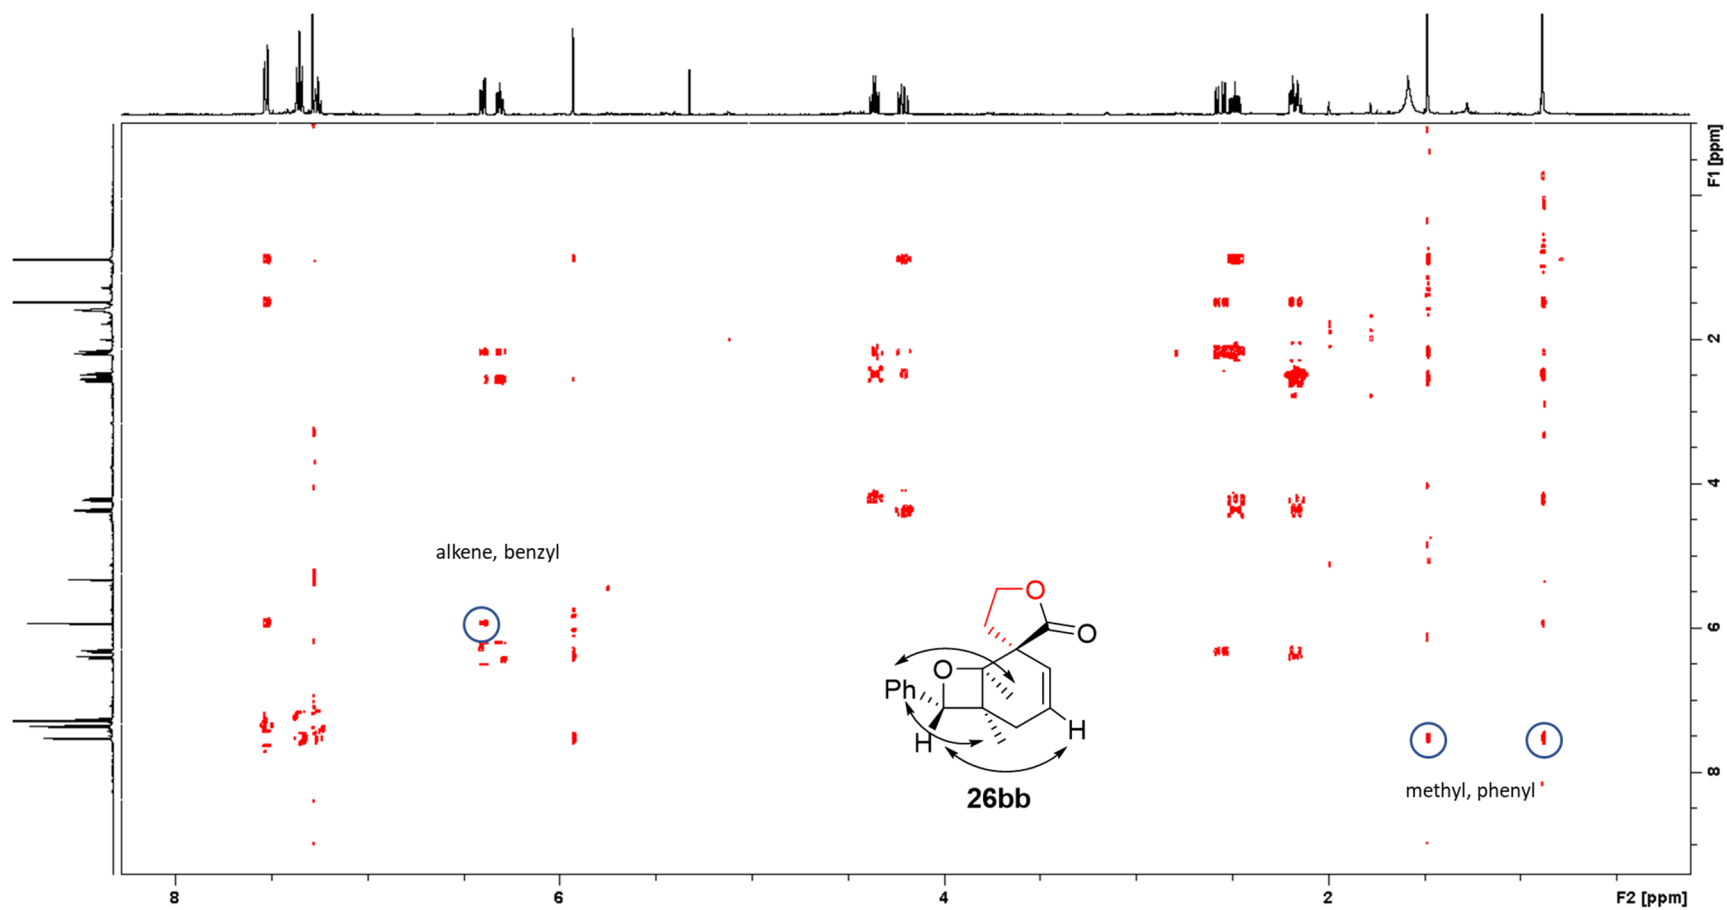

**$^1\text{H}$  NMR spectrum (500 MHz,  $\text{CDCl}_3$ ) of 26bc**

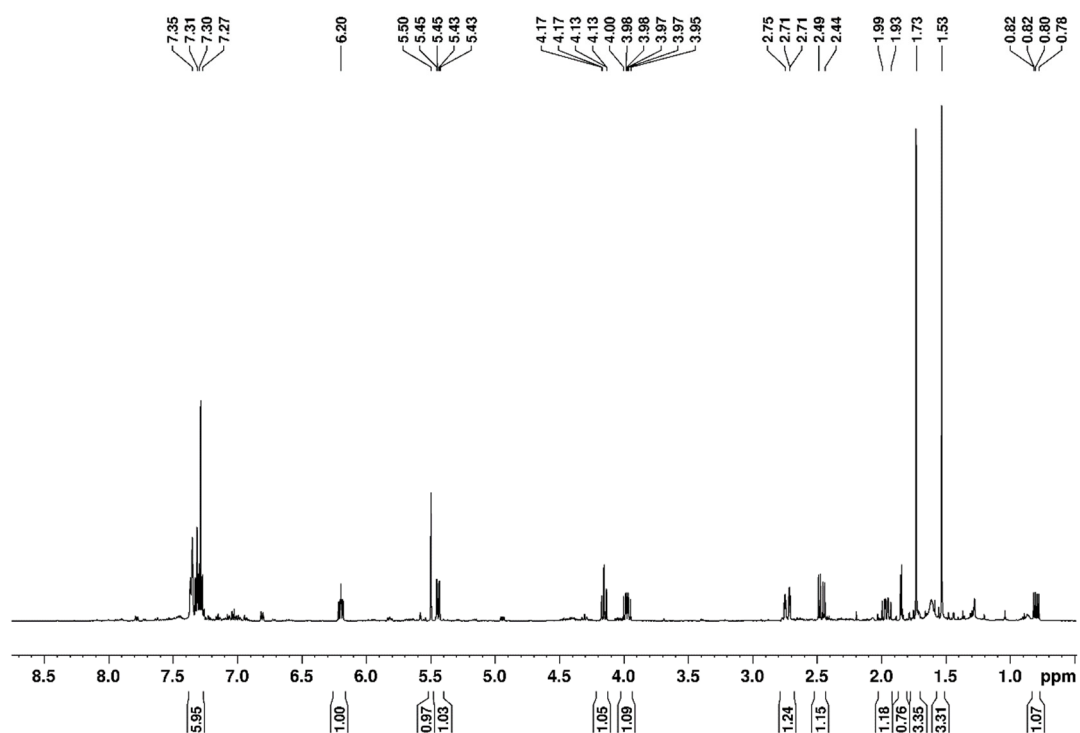

**$^{13}\text{C}$  NMR spectrum (125 MHz)**

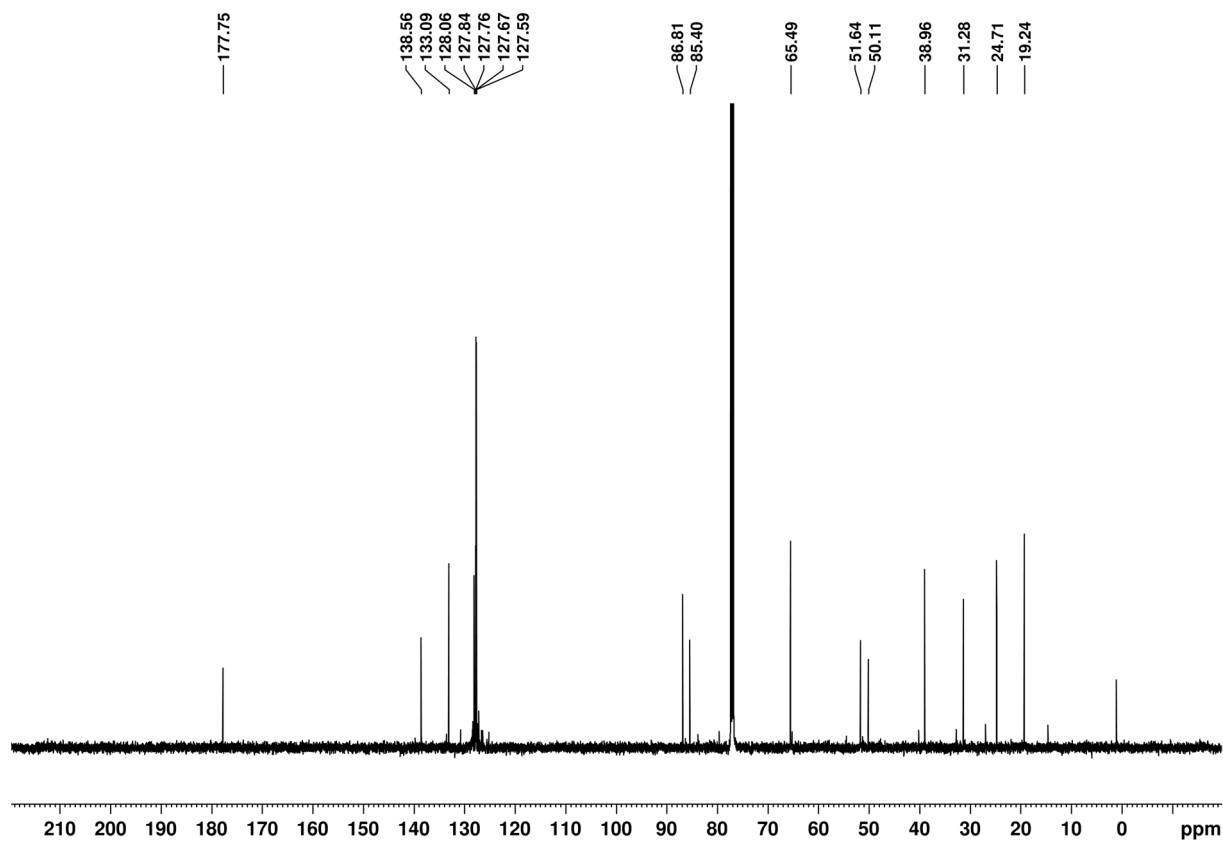

# NOESY of 26bc

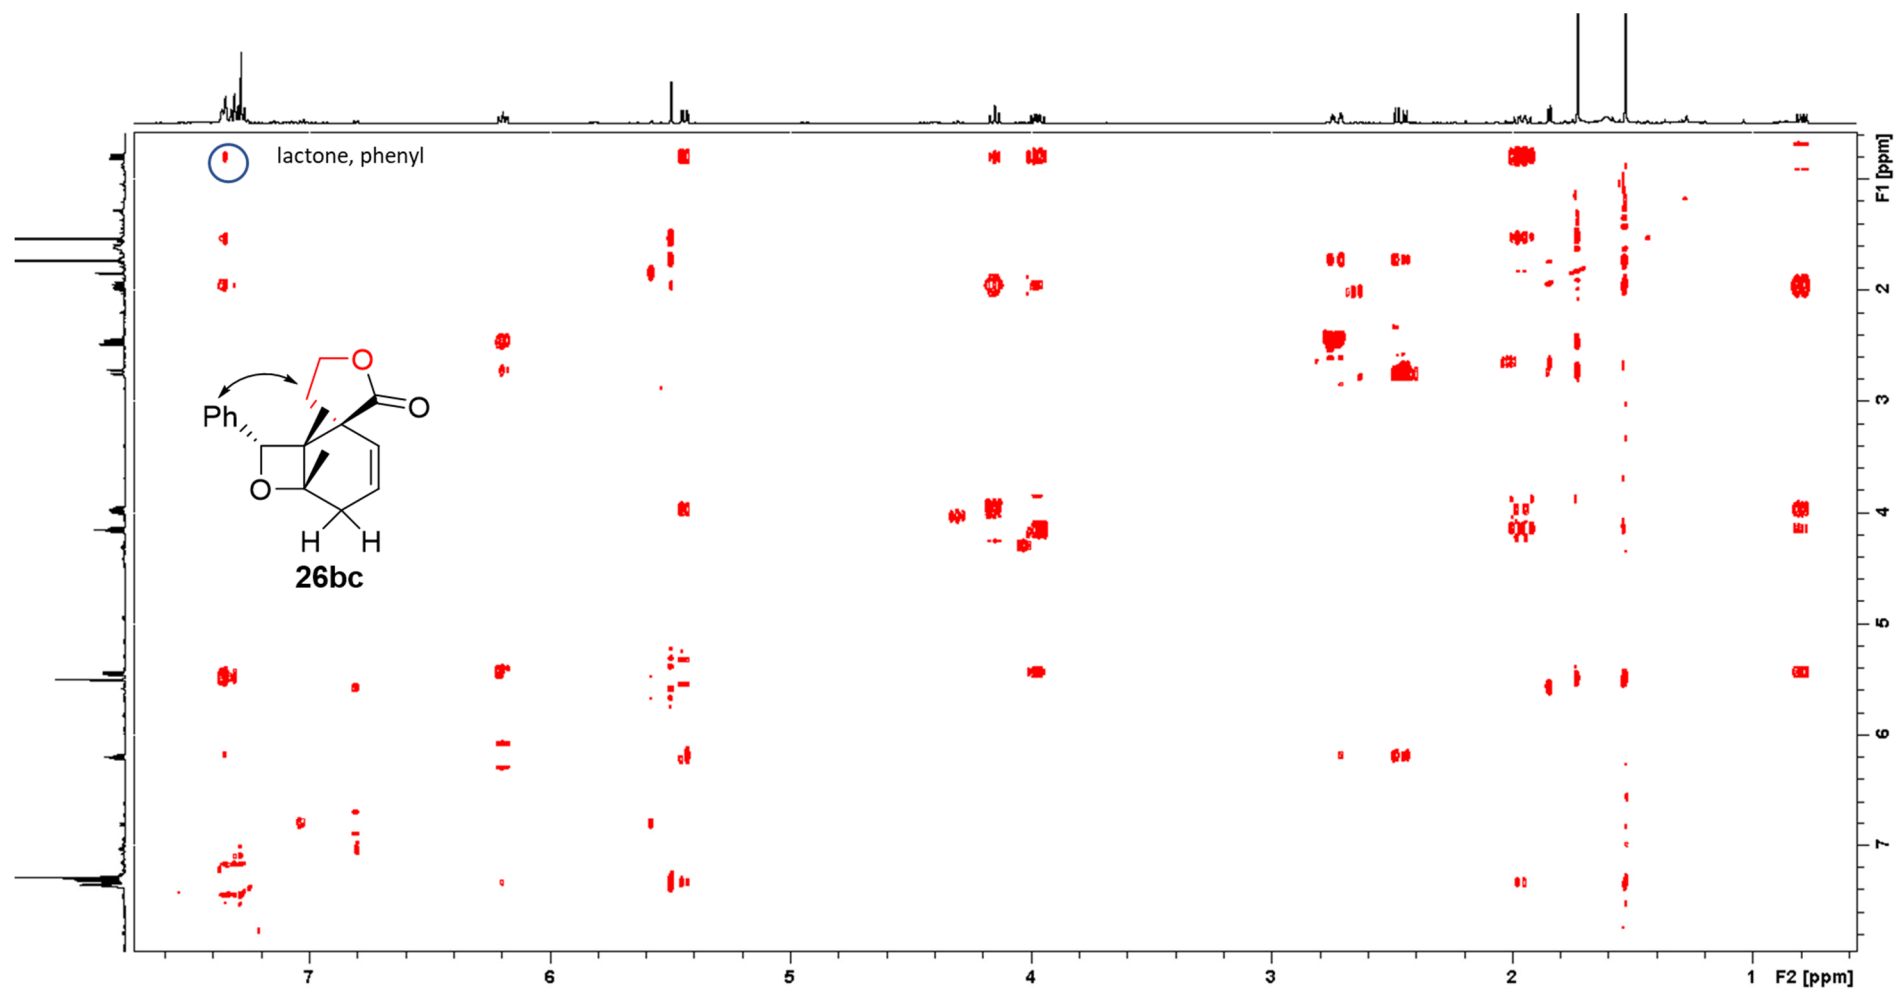

**$^1\text{H}$  NMR spectrum (500 MHz, acetone- $\text{d}_6$ ) of 20c DS1**

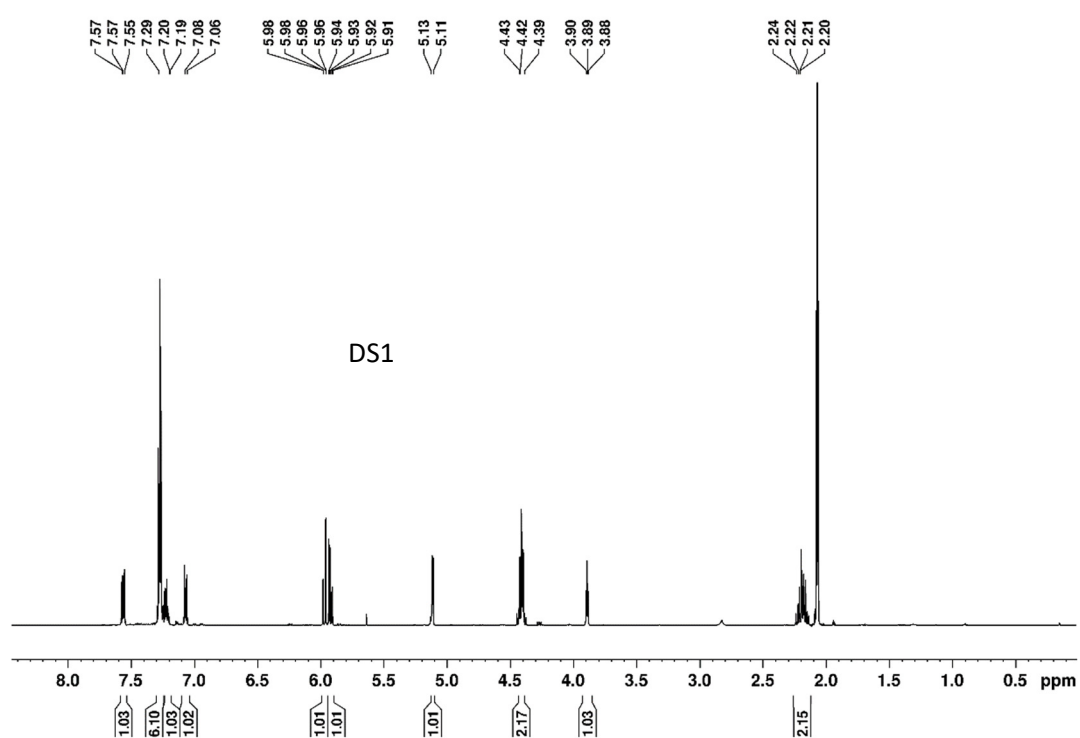

**$^{13}\text{C}$  NMR spectrum (125 MHz)**

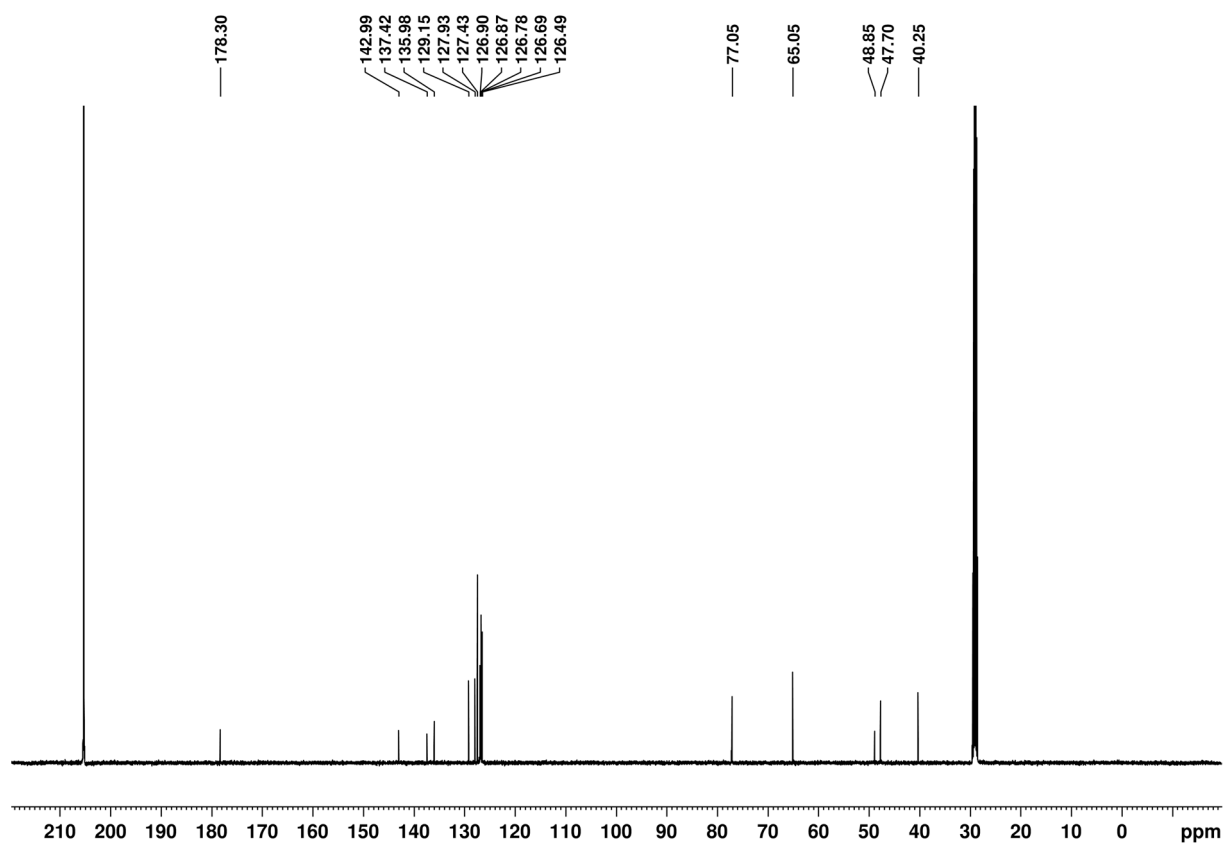

<sup>1</sup>H NMR spectrum (500 MHz, CDCl<sub>3</sub>) of 20c DS2

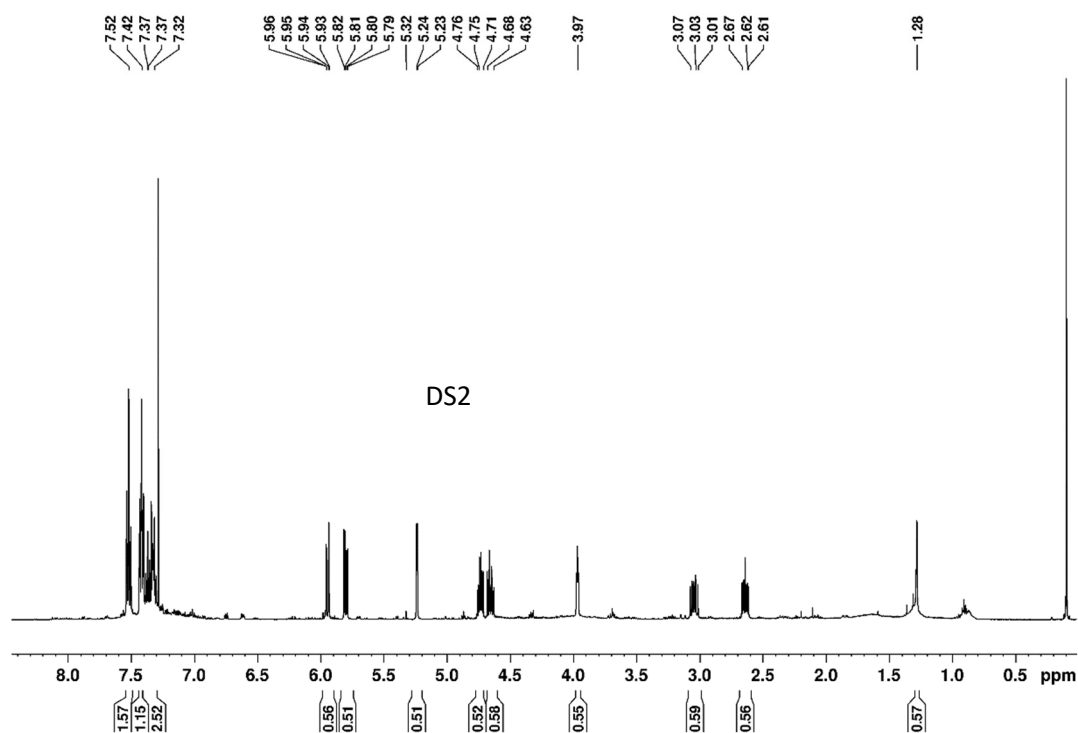

<sup>13</sup>C NMR spectrum (125 MHz)

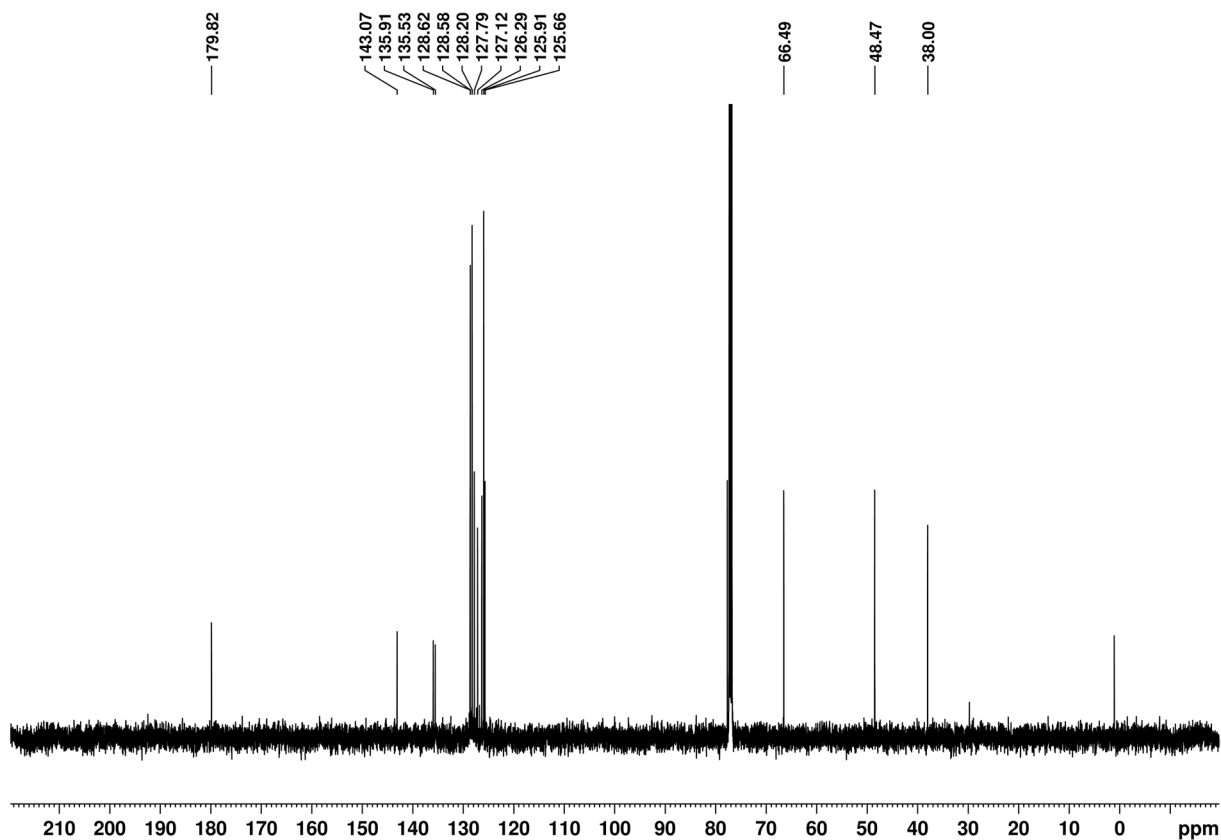



**$^1\text{H}$  NMR spectrum (500 MHz,  $\text{CDCl}_3$ ) of 20c DS3**

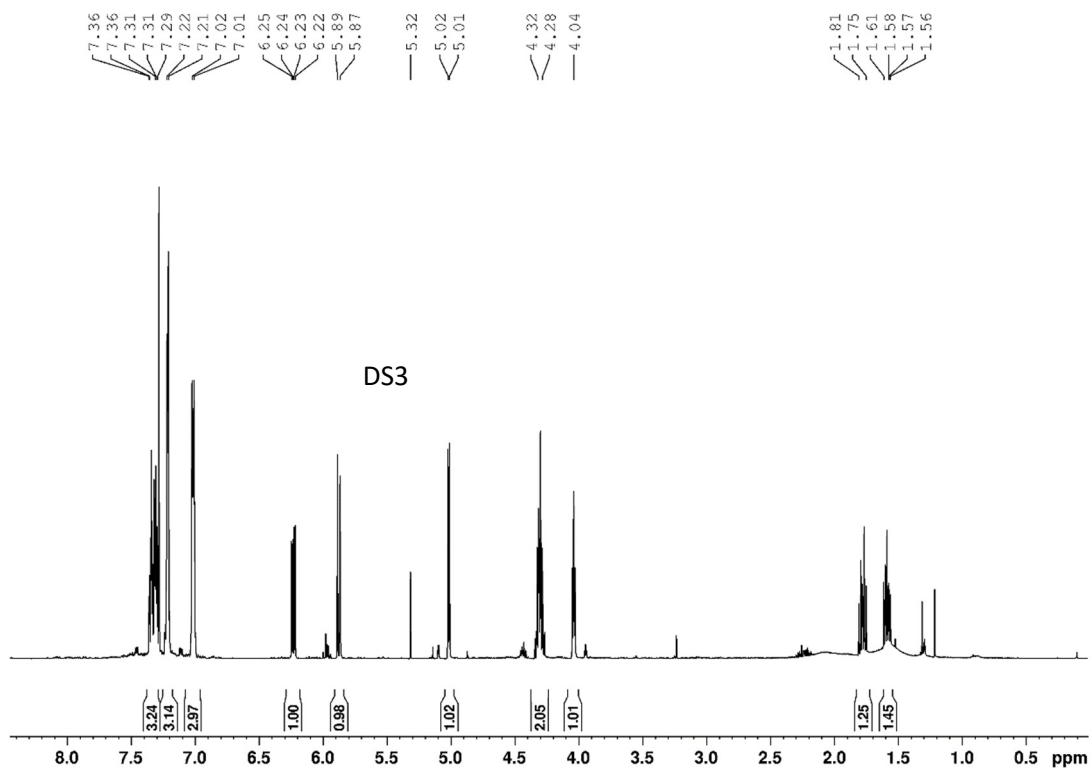

**$^{13}\text{C}$  NMR spectrum (125 MHz)**

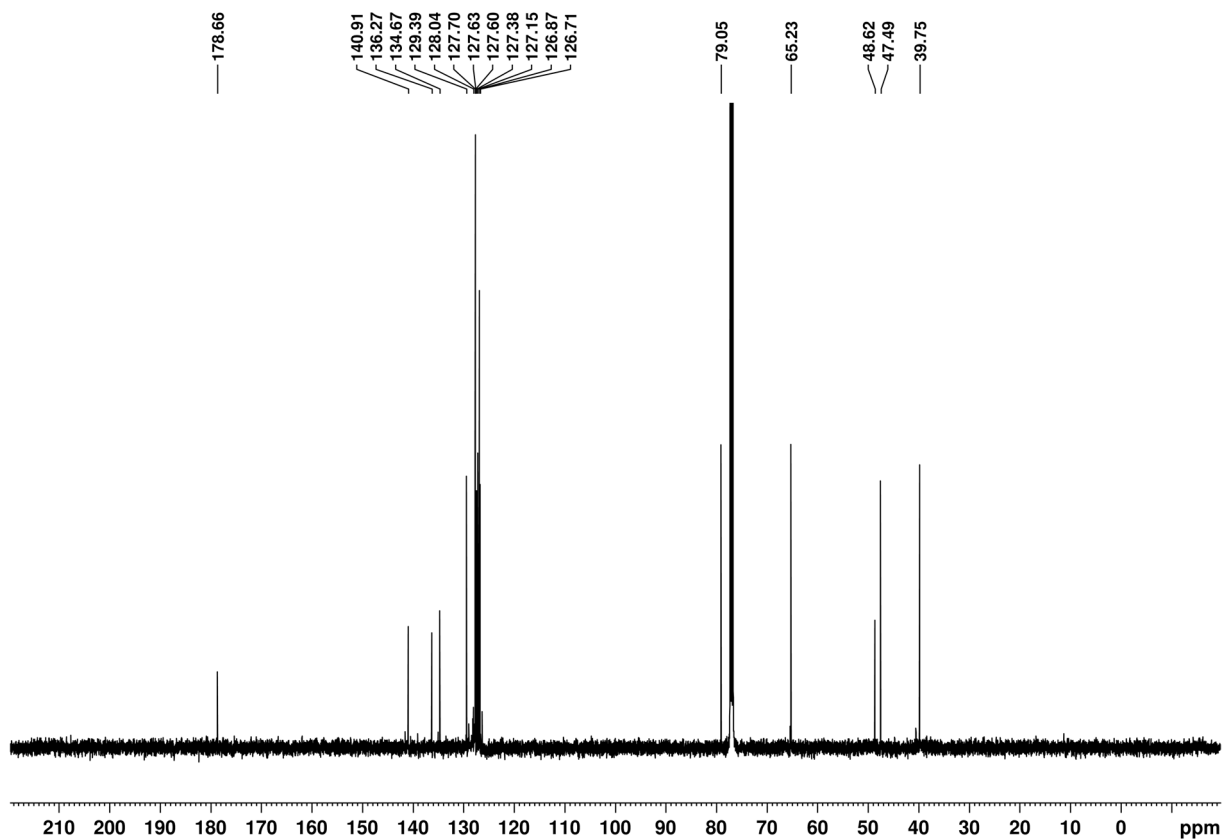

**$^1\text{H}$  NMR Spectrum (500 MHz,  $\text{CDCl}_3$ ) of 20c DS4**

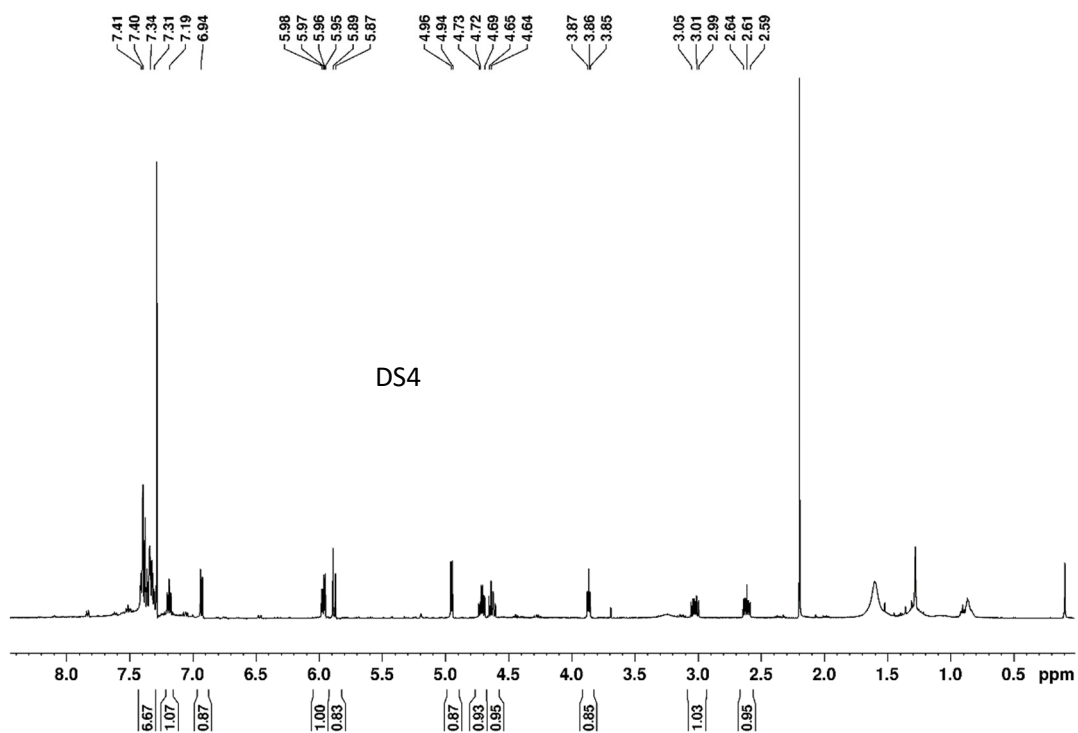

**$^{13}\text{C}$  NMR spectrum (125 MHz)**

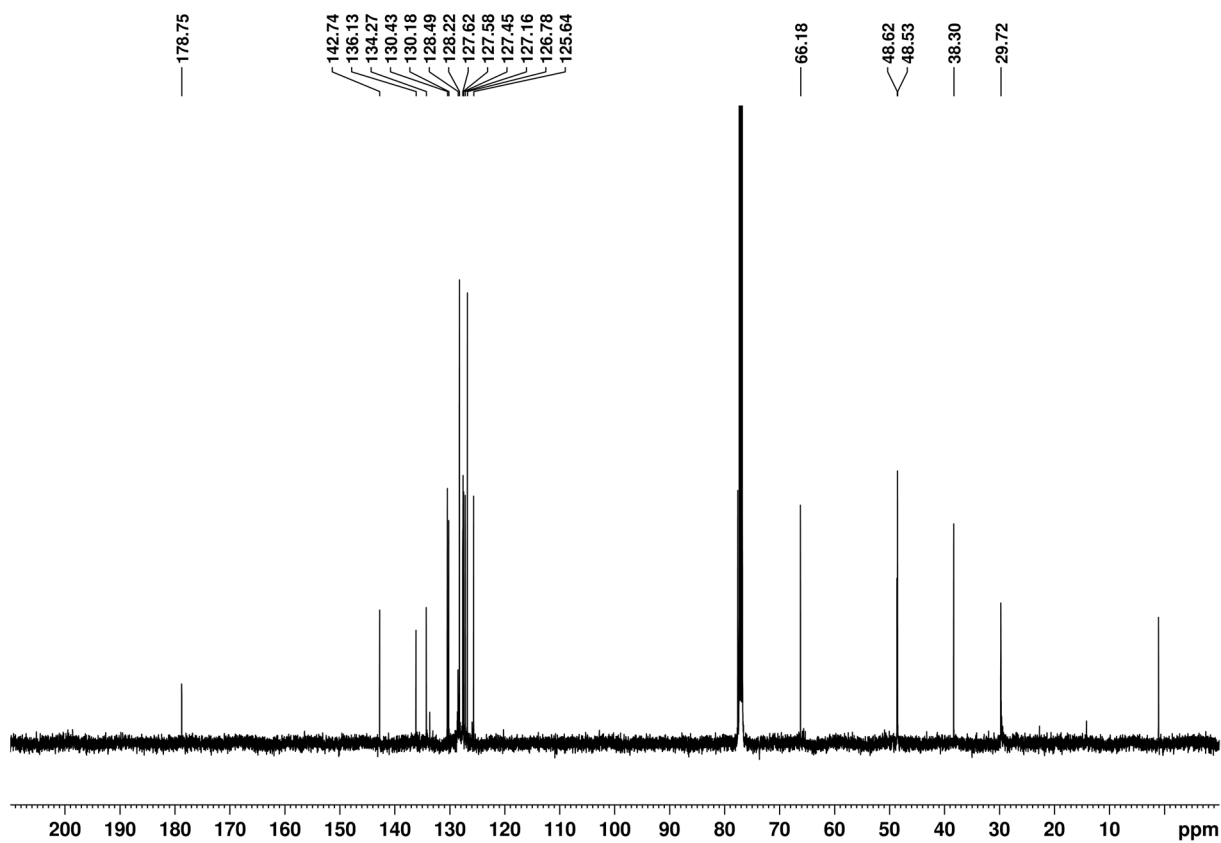

### 3.4. Products 27 from Reactions with Benzophenone (19)

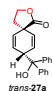

$^1\text{H}$  NMR spectrum (500 MHz,  $\text{CDCl}_3$ ) of *trans*-27a

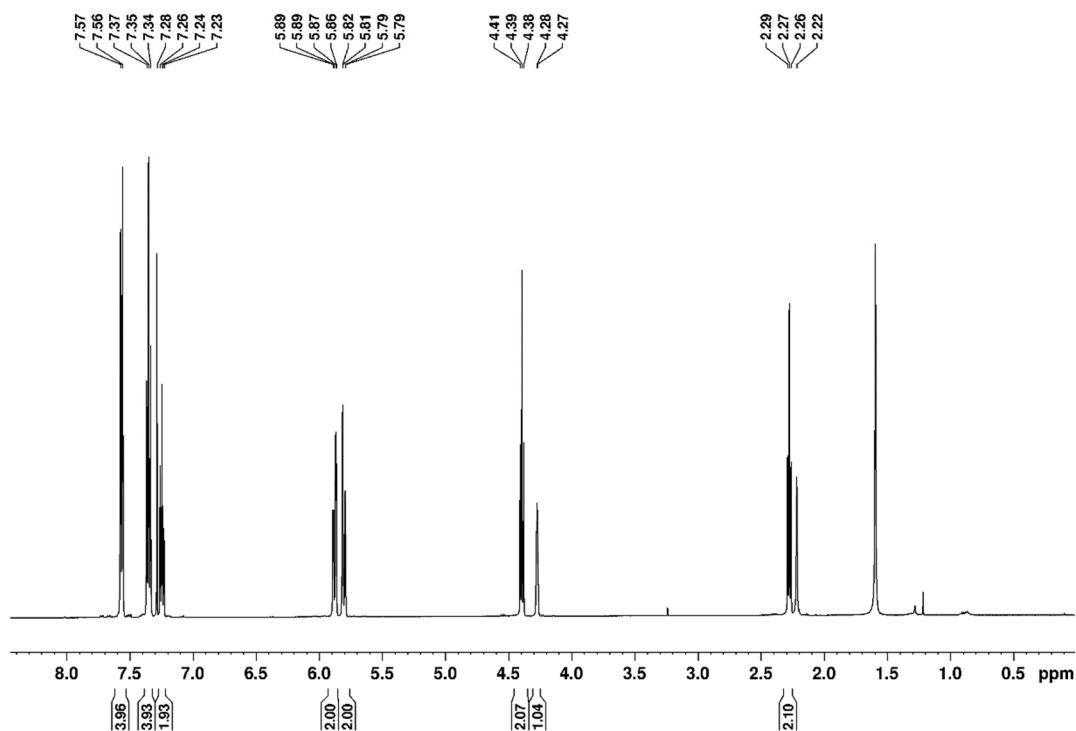

$^{13}\text{C}$  NMR spectrum (125 MHz)

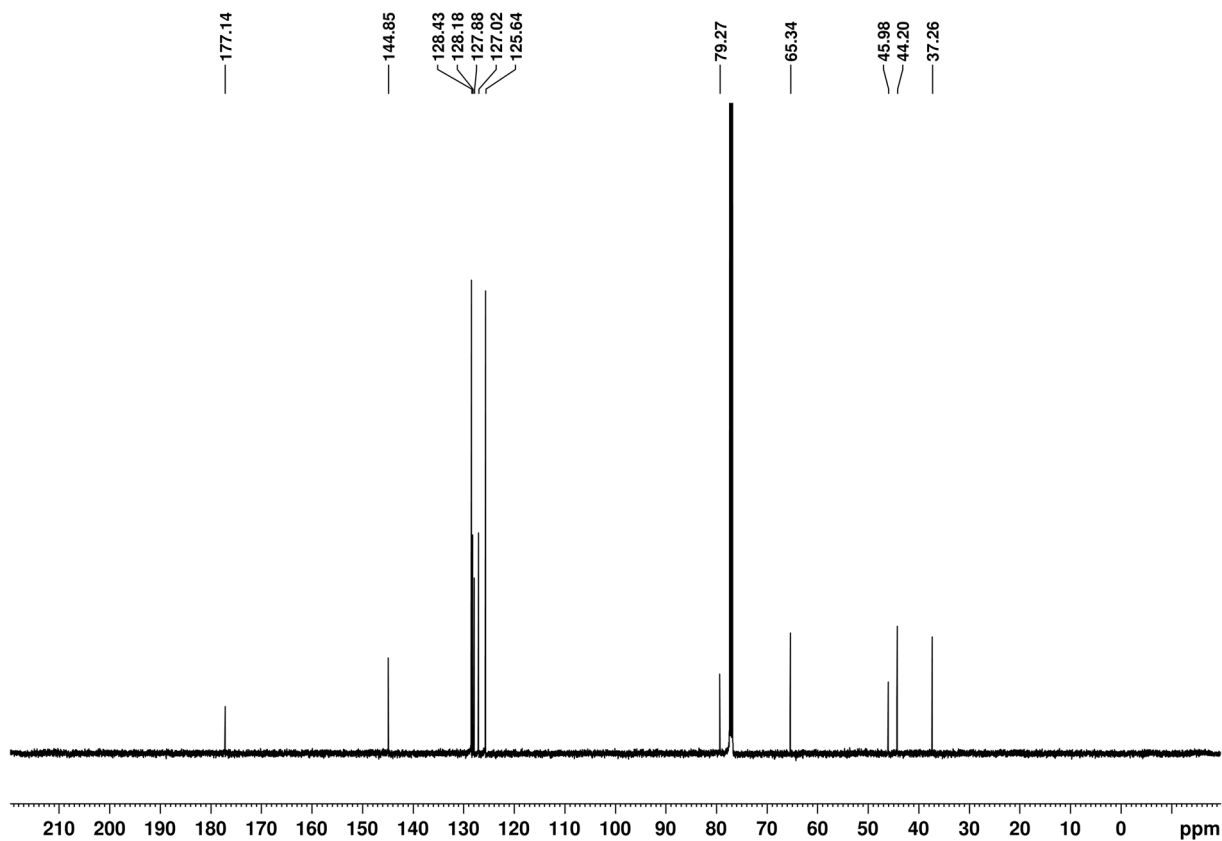

**$^1\text{H}$  NMR spectrum (600 MHz,  $\text{CDCl}_3$ ) of *cis*-27a**

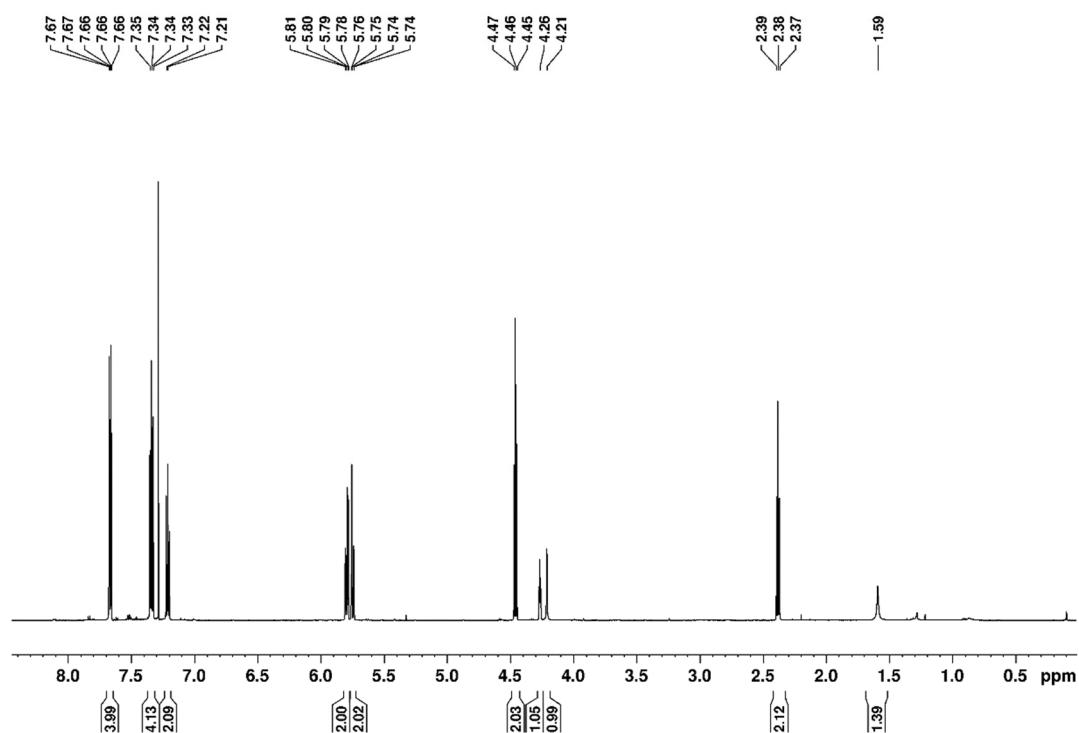

**$^{13}\text{C}$  NMR spectrum (150 MHz)**

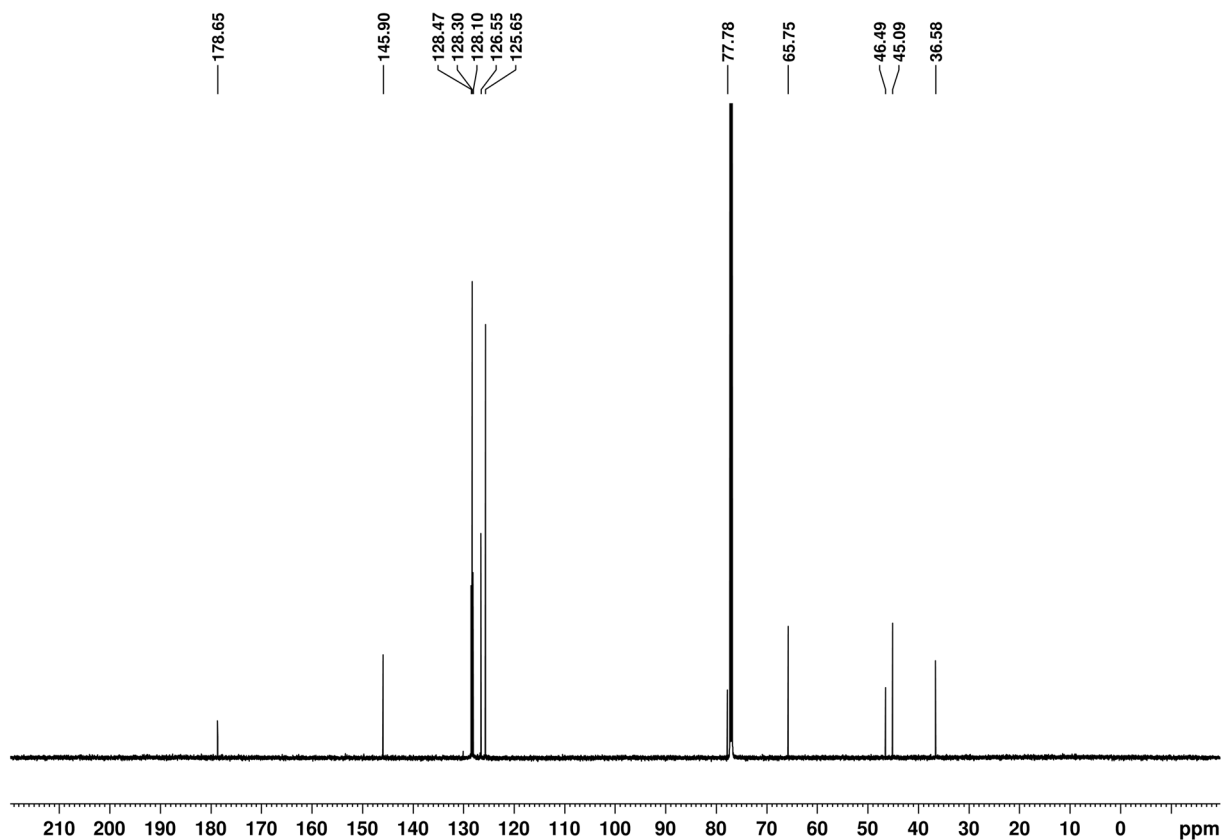

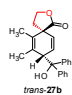

$^1\text{H}$  NMR spectrum (500 MHz,  $\text{CDCl}_3$ ) of *trans*-27b

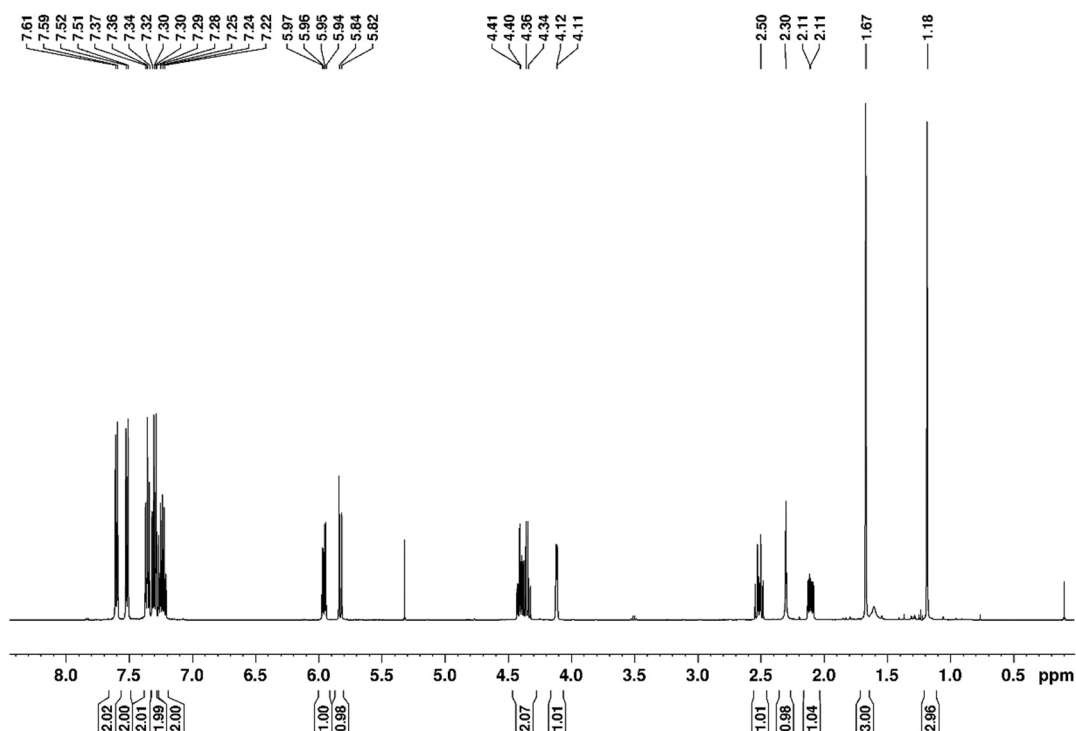

$^{13}\text{C}$  NMR spectrum (125 MHz)

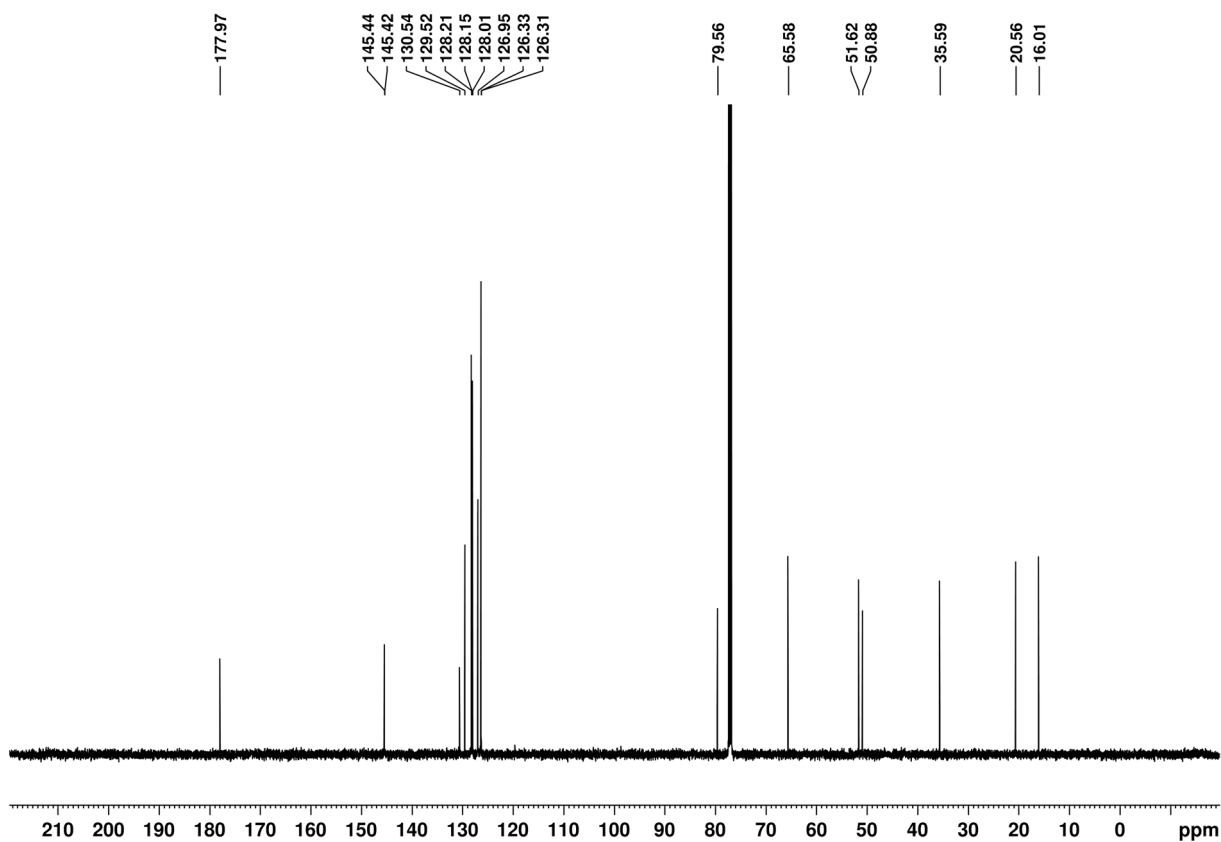

**$^1\text{H}$  NMR spectrum (500 MHz,  $\text{CDCl}_3$ ) of *cis*-27b**

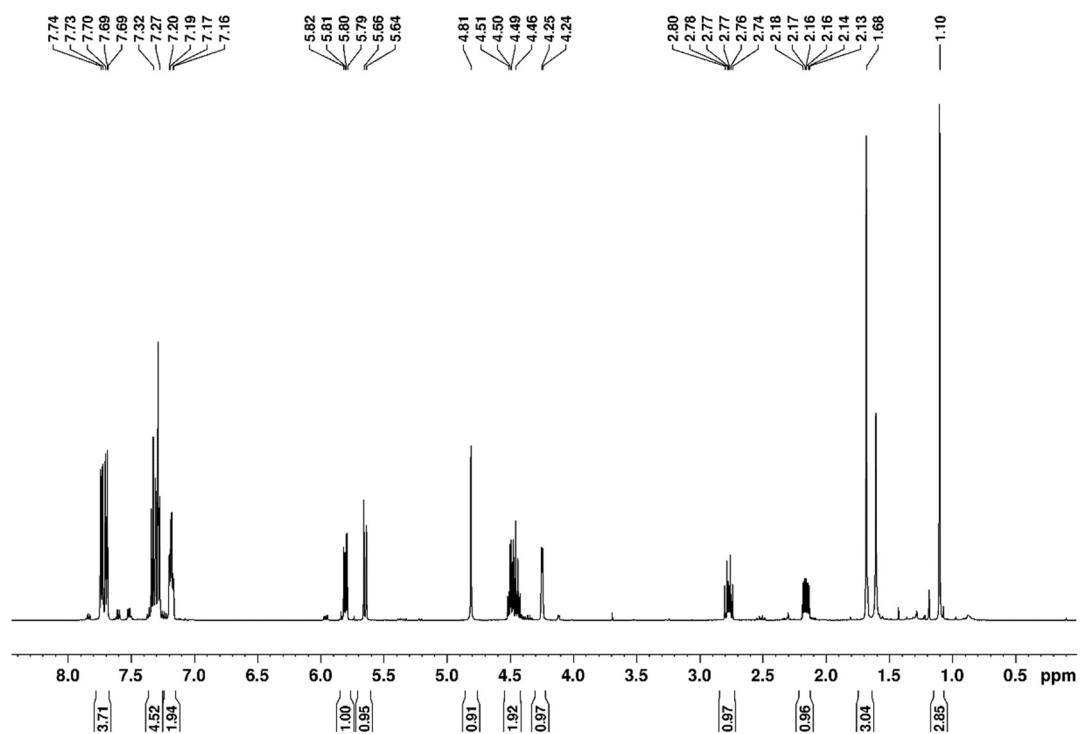

**$^{13}\text{C}$  NMR spectrum (125 MHz)**

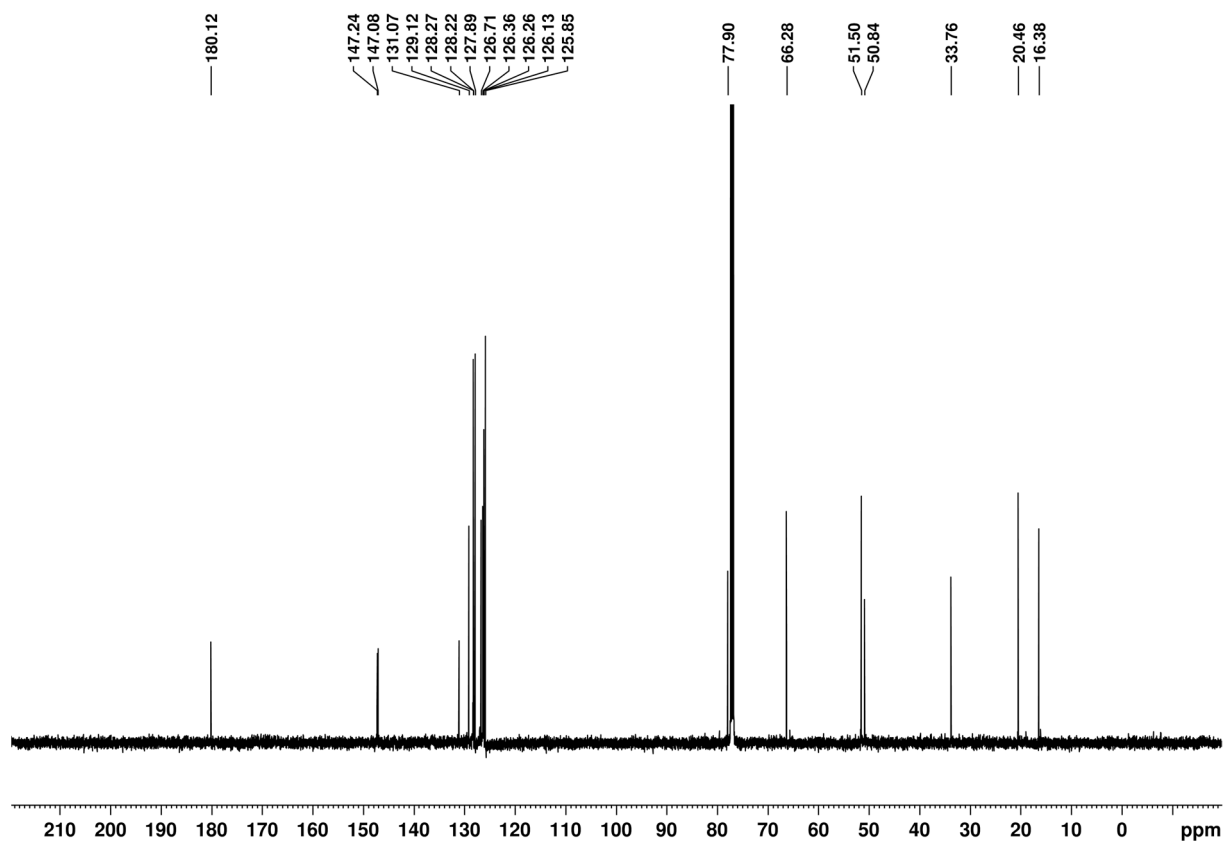

**<sup>1</sup>H NMR spectrum (500 MHz, CDCl<sub>3</sub>) of *trans*-27c**

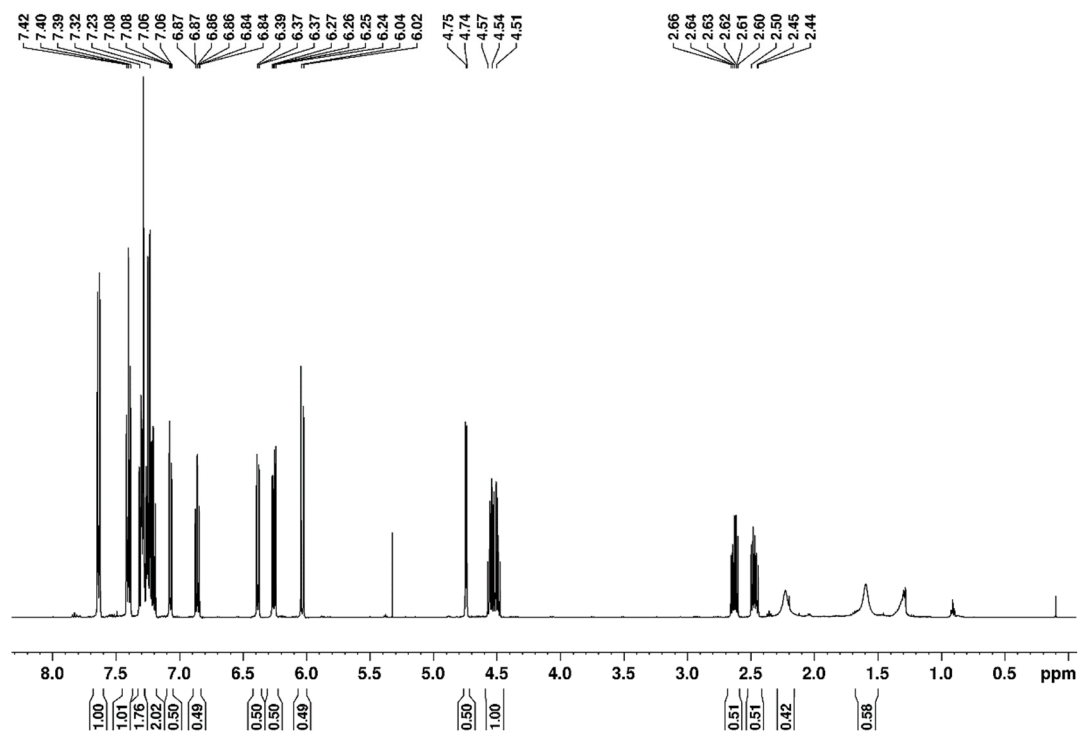

**<sup>13</sup>C NMR spectrum (125 MHz)**

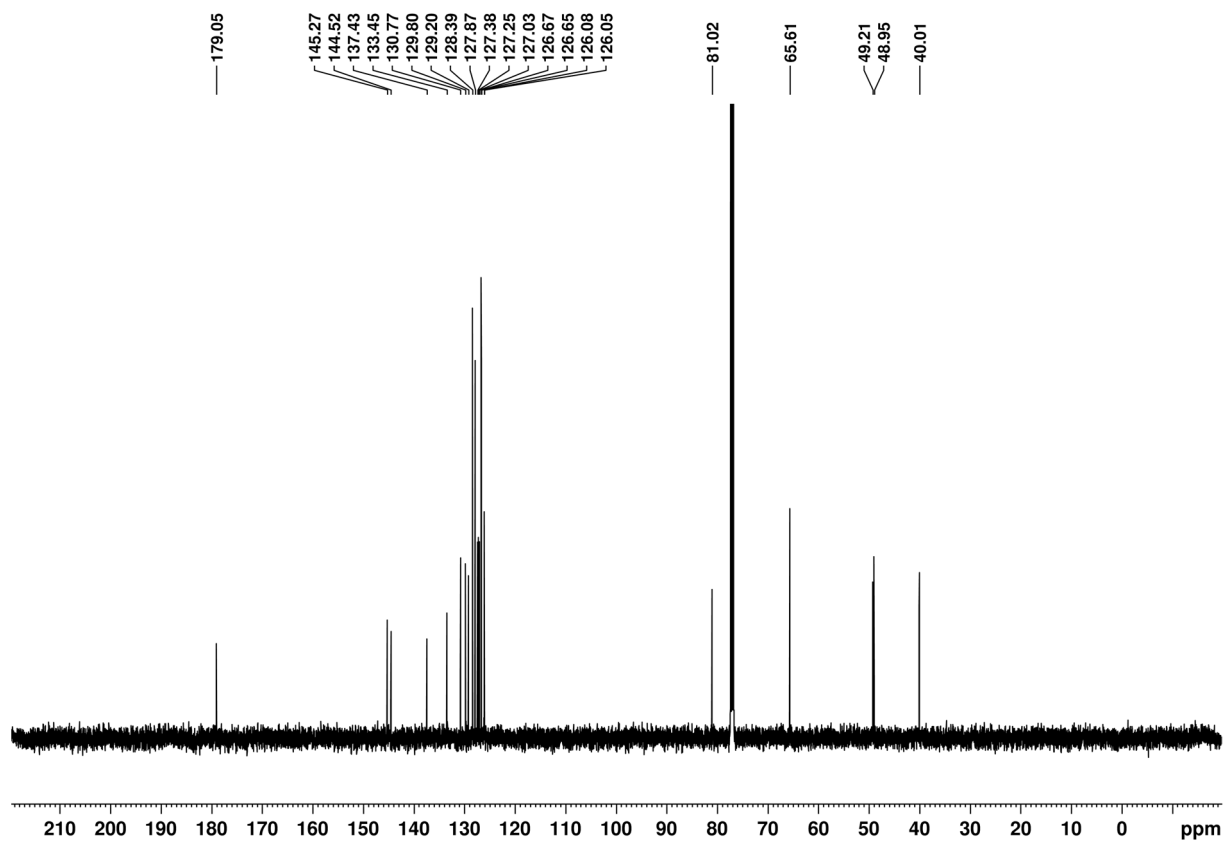

<sup>1</sup>H NMR spectrum (500 MHz, CDCl<sub>3</sub> and C<sub>2</sub>D<sub>2</sub>Cl<sub>4</sub>) of *cis*-27c

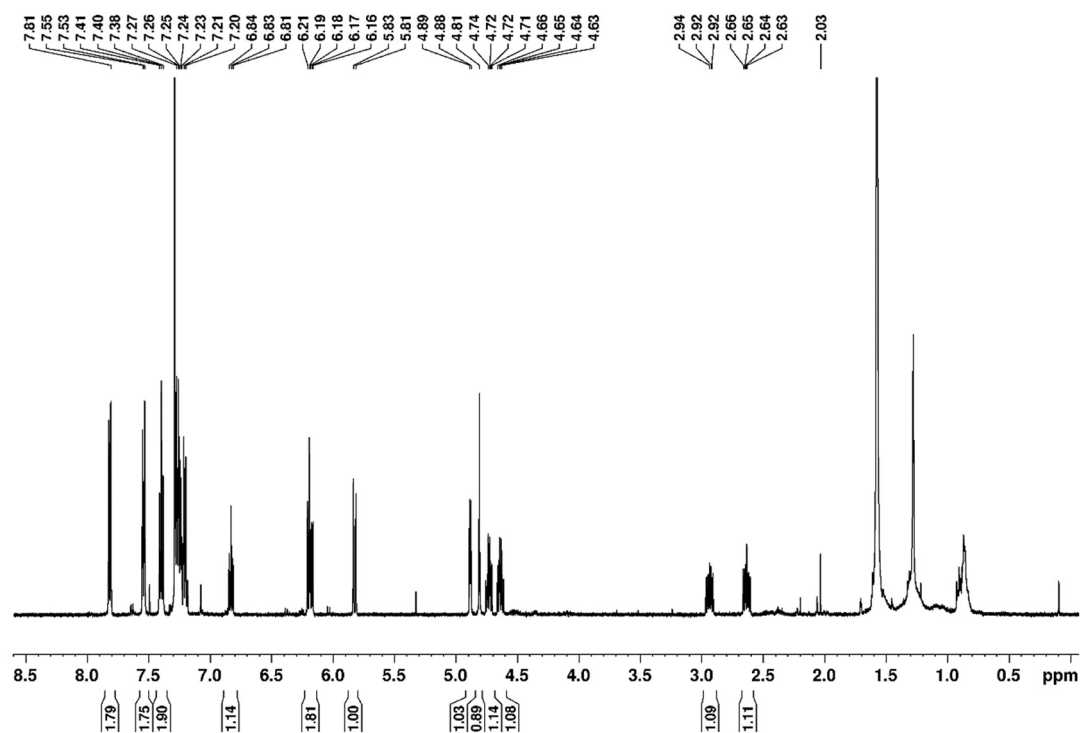

<sup>13</sup>C NMR spectrum (125 MHz)

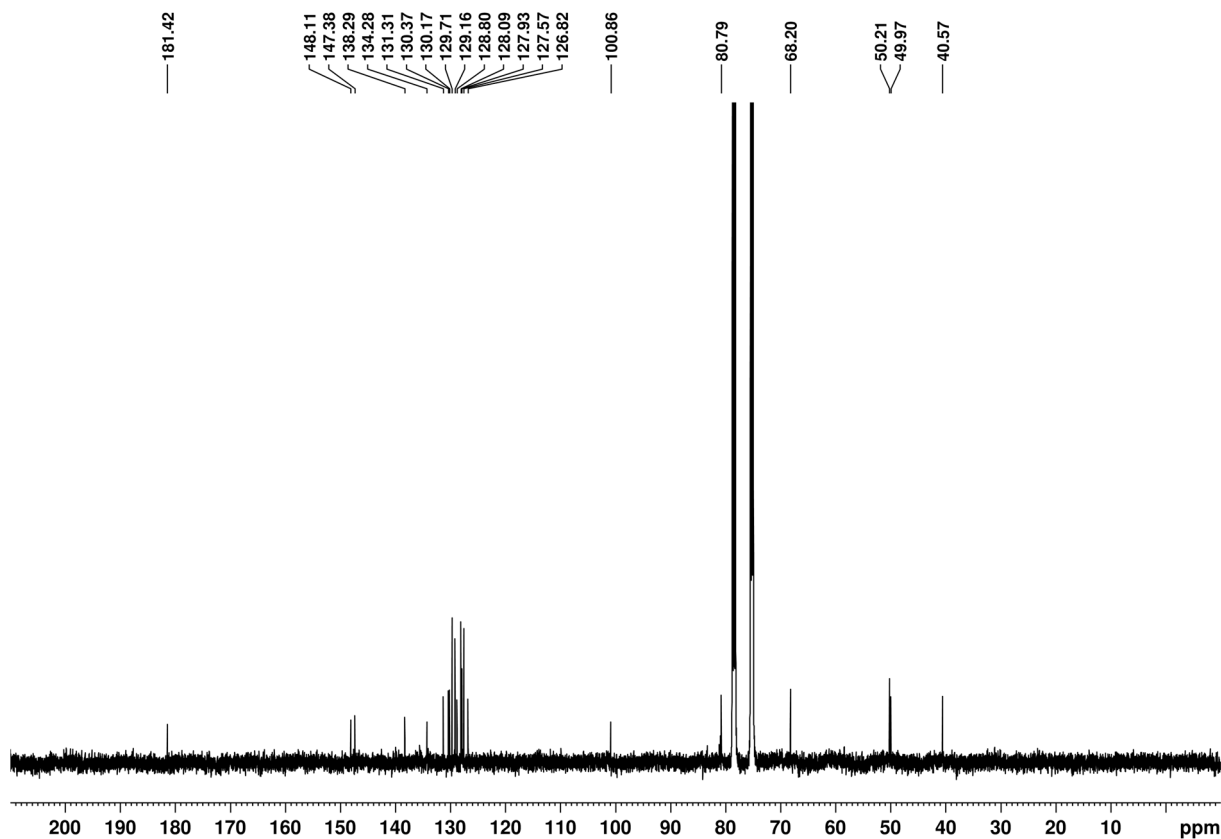



## 4. X-ray Structure Analyses

### General

The crystal structures of the compounds **13c**, *cis*-**27a**, *trans*-**27b** and *trans*-**27c** were determined by single crystal structure analysis. Suitable single crystals were selected using a Leica M205C light microscope and separated with oil. Microscope images show single crystals of the compounds. X-ray crystal structure analysis was performed on a Stadivari diffractometer (Stoe) with monochromated Mo-K $\alpha$  radiation ( $\lambda = 0.71073 \text{ \AA}$ ). The data correction was performed using the program X-Area [35]. The structures were solved by direct methods and refined against  $F^2$  on all data by full-matrix least-squares using the SHELX suite of programs [36,37]. All non-hydrogen atoms were refined anisotropically, the hydrogen atoms were placed on calculated positions. **Table 1** was created using FinalCif [38]. The crystal structures were visualized with Diamond 4 [39]. The data (**13c**: CCDC 2287188, *cis*-**27a**: CCDC 2287189, *trans*-**27b**: CCDC 2287193, *trans*-**27c**: CCDC 2287194) can be obtained free of charge from The Cambridge Crystallographic Data Centre, <http://www.ccdc.cam.ac.uk>.

Klicken oder tippen Sie hier, um Text einzugeben.

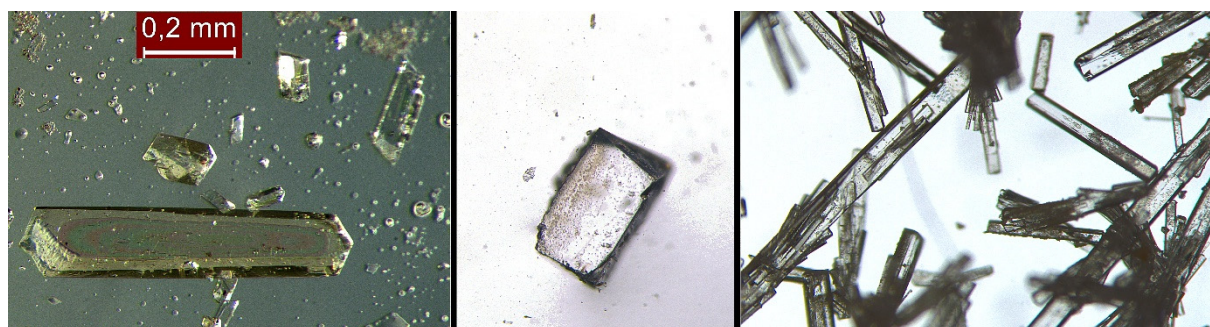

Microscope images of crystals of **13c** (left), *trans*-**27b** (center) and *trans*-**27c** (right).

## Crystallographic Data

**Table 1: Crystal data and structure refinement for 13c, *cis*-27a, *trans*-27b and *trans*-27c.**

| Compound                                            | <b>13c</b>                                                                     | <b><i>cis</i>-27a</b>                                                          | <b><i>trans</i>-27b</b>                                                        | <b><i>trans</i>-27c</b>                                                        |
|-----------------------------------------------------|--------------------------------------------------------------------------------|--------------------------------------------------------------------------------|--------------------------------------------------------------------------------|--------------------------------------------------------------------------------|
| CCDC number                                         | 2287188                                                                        | 2287189                                                                        | 2287193                                                                        | 2287194                                                                        |
| Empirical formula                                   | C <sub>13</sub> H <sub>12</sub> O <sub>2</sub>                                 | C <sub>22</sub> H <sub>20</sub> O <sub>3</sub>                                 | C <sub>24</sub> H <sub>24</sub> O <sub>3</sub>                                 | C <sub>26</sub> H <sub>22</sub> O <sub>3</sub>                                 |
| Formula weight                                      | 200.23                                                                         | 332.38                                                                         | 360.43                                                                         | 382.43                                                                         |
| Temperature [K]                                     | 240                                                                            | 210                                                                            | 210                                                                            | 210                                                                            |
| Crystal system                                      | monoclinic                                                                     | triclinic                                                                      | orthorhombic                                                                   | orthorhombic                                                                   |
| Space group (number)                                | <i>P</i> 2 <sub>1</sub> / <i>c</i> (14)                                        | <i>P</i> 1̄ (2)                                                                | <i>P</i> 2 <sub>1</sub> 2 <sub>1</sub> 2 <sub>1</sub> (19)                     | <i>P</i> 2 <sub>1</sub> 2 <sub>1</sub> 2 <sub>1</sub> (19)                     |
| <i>a</i> [Å]                                        | 9.837(2)                                                                       | 9.4469(19)                                                                     | 6.1461(2)                                                                      | 6.2613(4)                                                                      |
| <i>b</i> [Å]                                        | 11.087(2)                                                                      | 10.192(2)                                                                      | 11.9288(4)                                                                     | 11.8297(7)                                                                     |
| <i>c</i> [Å]                                        | 9.4485(19)                                                                     | 10.454(2)                                                                      | 25.5496(8)                                                                     | 26.0964(16)                                                                    |
| α [°]                                               | 90                                                                             | 103.99(3)                                                                      | 90                                                                             | 90                                                                             |
| β [°]                                               | 106.09(3)                                                                      | 103.50(3)                                                                      | 90                                                                             | 90                                                                             |
| γ [°]                                               | 90                                                                             | 111.81(3)                                                                      | 90                                                                             | 90                                                                             |
| Volume [Å <sup>3</sup> ]                            | 990.1(4)                                                                       | 846.4(4)                                                                       | 1873.18(11)                                                                    | 1932.9(2)                                                                      |
| <i>Z</i>                                            | 4                                                                              | 2                                                                              | 4                                                                              | 4                                                                              |
| ρ <sub>calc</sub> [gcm <sup>-3</sup> ]              | 1.343                                                                          | 1.304                                                                          | 1.278                                                                          | 1.314                                                                          |
| μ [mm <sup>-1</sup> ]                               | 0.090                                                                          | 0.085                                                                          | 0.083                                                                          | 0.085                                                                          |
| <i>F</i> (000)                                      | 424                                                                            | 352                                                                            | 768                                                                            | 808                                                                            |
| Crystal size [mm <sup>3</sup> ]                     | 0.500×0.400×0.200                                                              | 0.500×0.367×0.100                                                              | 0.790×0.597×0.500                                                              | 0.500×0.350×0.250                                                              |
| Crystal colour                                      | yellow                                                                         | colorless                                                                      | colorless                                                                      | colorless                                                                      |
| Crystal shape                                       | plate                                                                          | plate                                                                          | block                                                                          | rod                                                                            |
| Radiation                                           | Mo K <sub>α</sub> (λ=0.71073 Å)                                                |
| 2θ range [°]                                        | 5.66 to 65.21<br>(0.66 Å)                                                      | 6.55 to 65.67<br>(0.66 Å)                                                      | 5.88 to 49.96<br>(0.84 Å)                                                      | 7.13 to 50.96<br>(0.83 Å)                                                      |
| Index ranges                                        | -14 ≤ <i>h</i> ≤ 14<br>-16 ≤ <i>k</i> ≤ 16<br>-12 ≤ <i>l</i> ≤ 14              | -14 ≤ <i>h</i> ≤ 13<br>-14 ≤ <i>k</i> ≤ 14<br>-15 ≤ <i>l</i> ≤ 13              | -7 ≤ <i>h</i> ≤ 7<br>-14 ≤ <i>k</i> ≤ 14<br>-30 ≤ <i>l</i> ≤ 30                | -7 ≤ <i>h</i> ≤ 7<br>-14 ≤ <i>k</i> ≤ 14<br>-31 ≤ <i>l</i> ≤ 31                |
| Reflections collected                               | 14834                                                                          | 21537                                                                          | 13355                                                                          | 10068                                                                          |
| Independent reflections                             | 3380<br><i>R</i> <sub>int</sub> = 0.0314<br><i>R</i> <sub>sigma</sub> = 0.0356 | 5655<br><i>R</i> <sub>int</sub> = 0.0456<br><i>R</i> <sub>sigma</sub> = 0.0466 | 3293<br><i>R</i> <sub>int</sub> = 0.0496<br><i>R</i> <sub>sigma</sub> = 0.0325 | 3487<br><i>R</i> <sub>int</sub> = 0.0382<br><i>R</i> <sub>sigma</sub> = 0.0428 |
| Completeness to θ = 25.242°                         | 99.9 %                                                                         | 99.4 %                                                                         | 99.6 %                                                                         | 97.3 %                                                                         |
| Data /                                              | 3380/0/137                                                                     | 5655/0/228                                                                     | 3293/0/250                                                                     | 3487/0/266                                                                     |
| Restraints /                                        |                                                                                |                                                                                |                                                                                |                                                                                |
| Parameters                                          |                                                                                |                                                                                |                                                                                |                                                                                |
| Goodness-of-fit on <i>F</i> <sup>2</sup>            | 1.010                                                                          | 1.007                                                                          | 1.026                                                                          | 1.040                                                                          |
| Final <i>R</i> indexes [ <i>I</i> ≥ 2σ( <i>I</i> )] | <i>R</i> <sub>1</sub> = 0.0426<br>w <i>R</i> <sub>2</sub> = 0.1136             | <i>R</i> <sub>1</sub> = 0.0490<br>w <i>R</i> <sub>2</sub> = 0.1158             | <i>R</i> <sub>1</sub> = 0.0415<br>w <i>R</i> <sub>2</sub> = 0.1058             | <i>R</i> <sub>1</sub> = 0.0491<br>w <i>R</i> <sub>2</sub> = 0.1083             |
| Final <i>R</i> indexes [all data]                   | <i>R</i> <sub>1</sub> = 0.0714<br>w <i>R</i> <sub>2</sub> = 0.1213             | <i>R</i> <sub>1</sub> = 0.0936<br>w <i>R</i> <sub>2</sub> = 0.1427             | <i>R</i> <sub>1</sub> = 0.0469<br>w <i>R</i> <sub>2</sub> = 0.1103             | <i>R</i> <sub>1</sub> = 0.0703<br>w <i>R</i> <sub>2</sub> = 0.1187             |
| Largest peak/hole [eÅ <sup>-3</sup> ]               | 0.28/-0.17                                                                     | 0.33/-0.27                                                                     | 0.18/-0.16                                                                     | 0.16/-0.18                                                                     |

## Visualizations of the crystal structure and molecule structure

### Compound 13c:

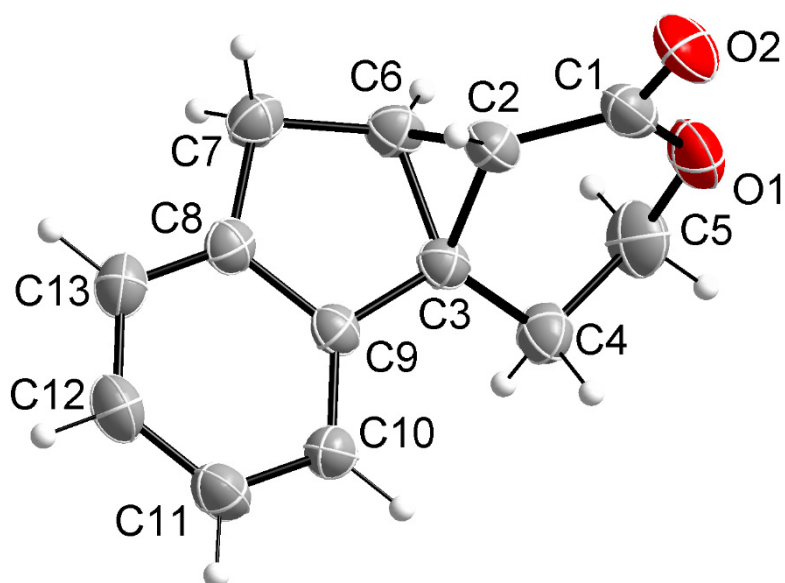

Molecular structure with atom labeling of **13c**. Displacement ellipsoids are shown at the 50% probability level.

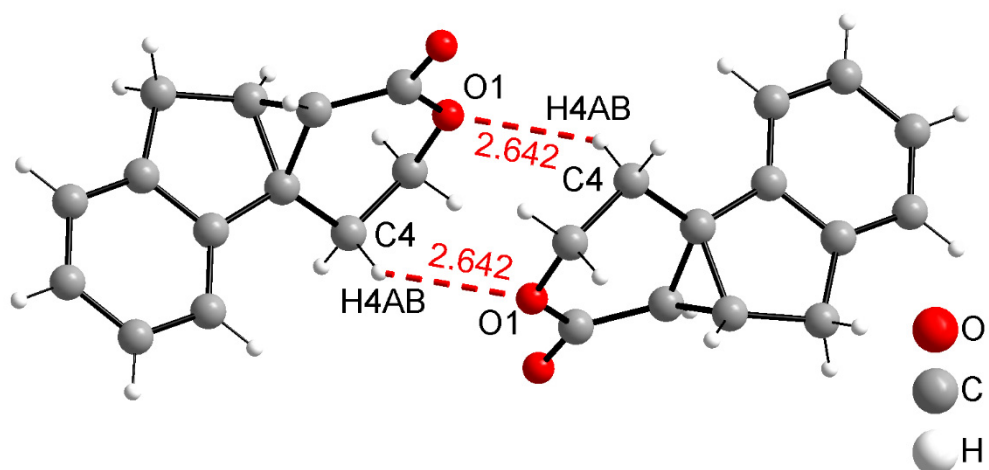

C-H...O hydrogen bonding (red dashed lines) in **13c** forming dimers.

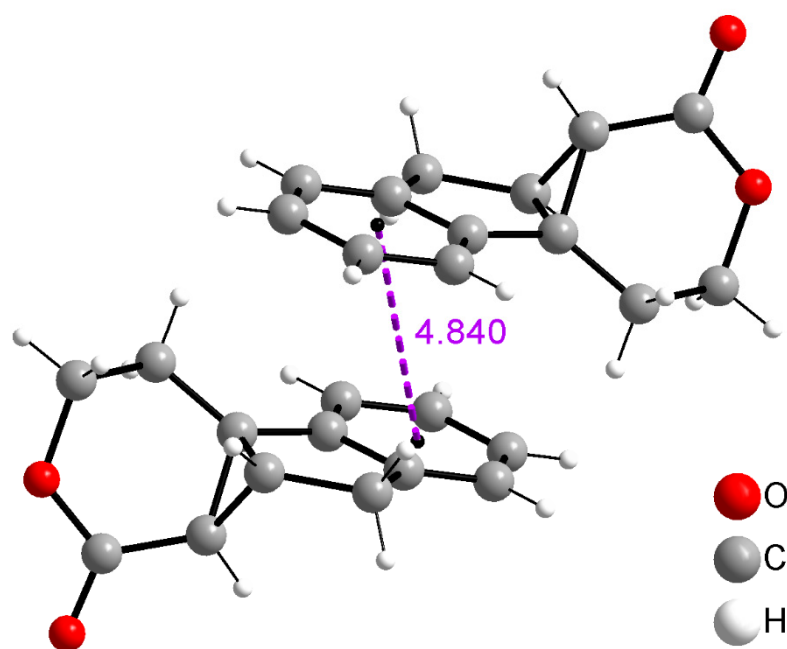

Stacking interactions (purple dotted lines) between the molecules in **13c**.

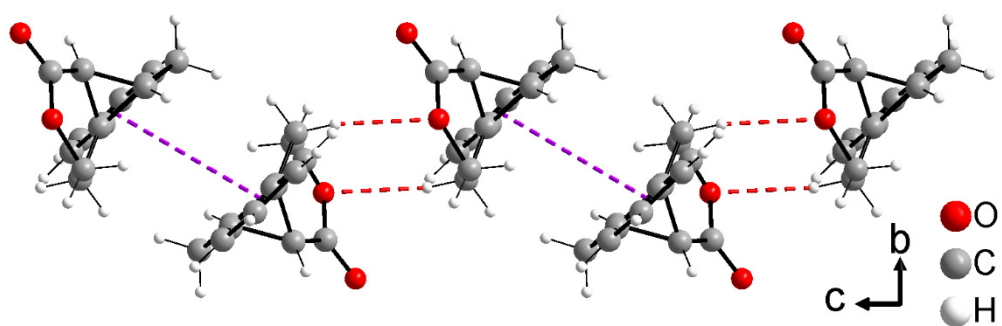

The hydrogen bonds (red dashed lines) and stacking interactions (purple dotted lines) form chains along the crystallographic *c* axis between the molecules in **13c**.

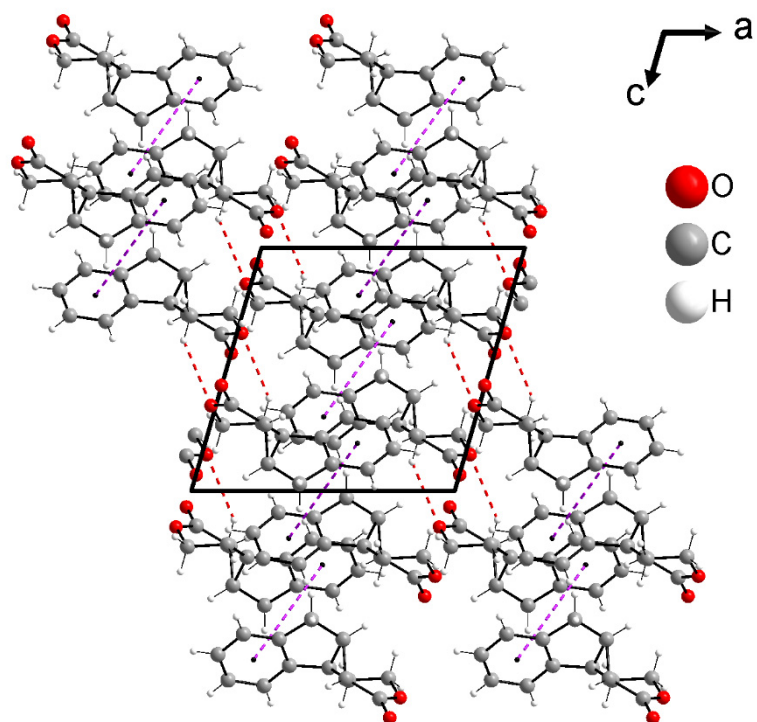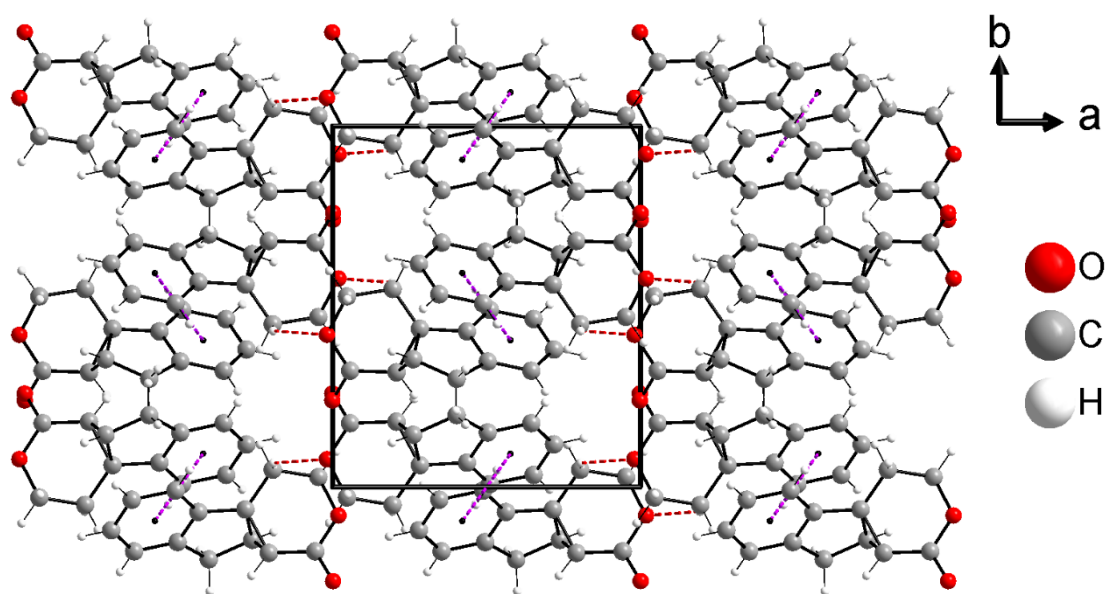

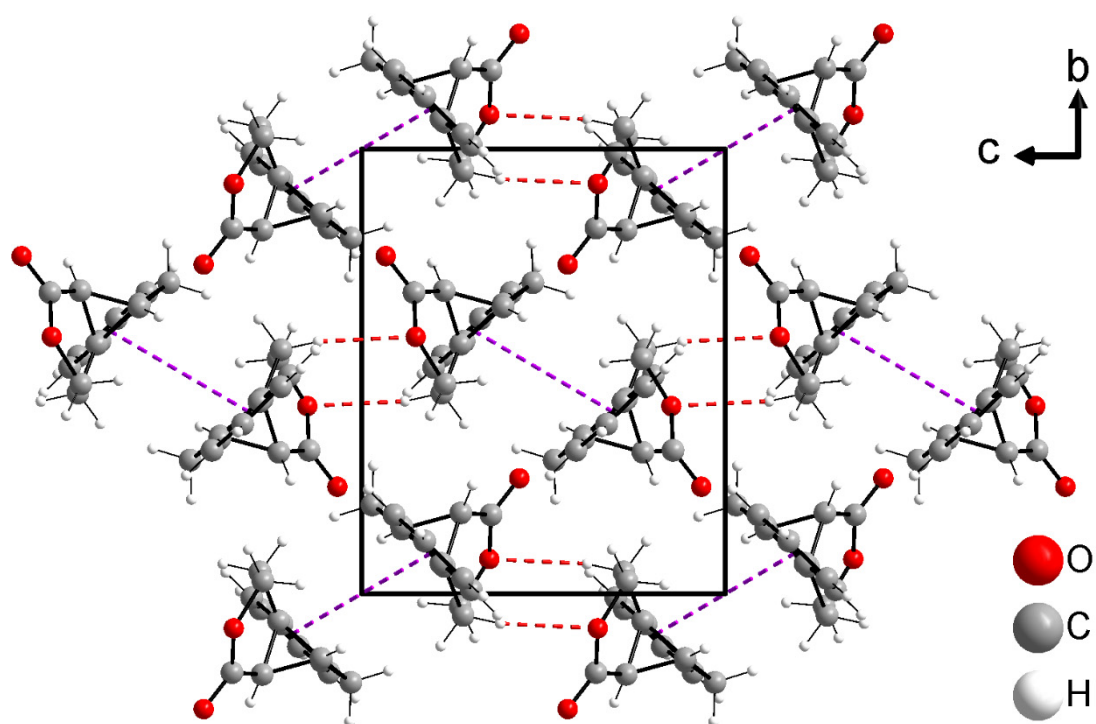

Cell view of **13c** looking along the crystallographic a axis.

Compound *cis*-27a:

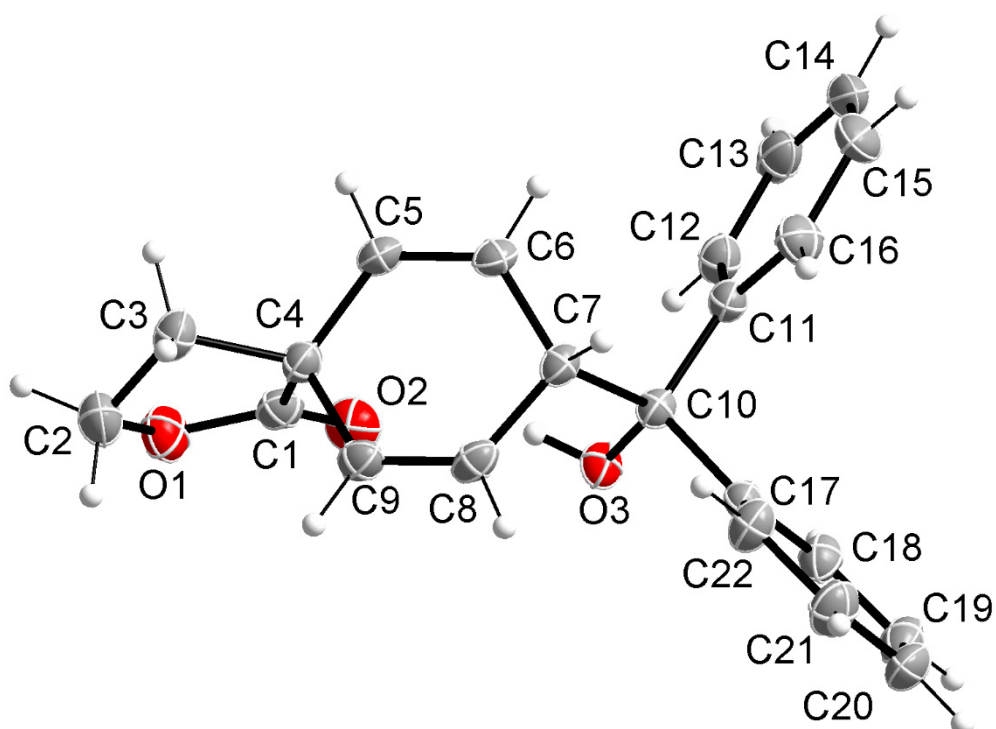

Molecular structure with atom labeling of *cis*-27a. Displacement ellipsoids are shown at the 50% probability level.

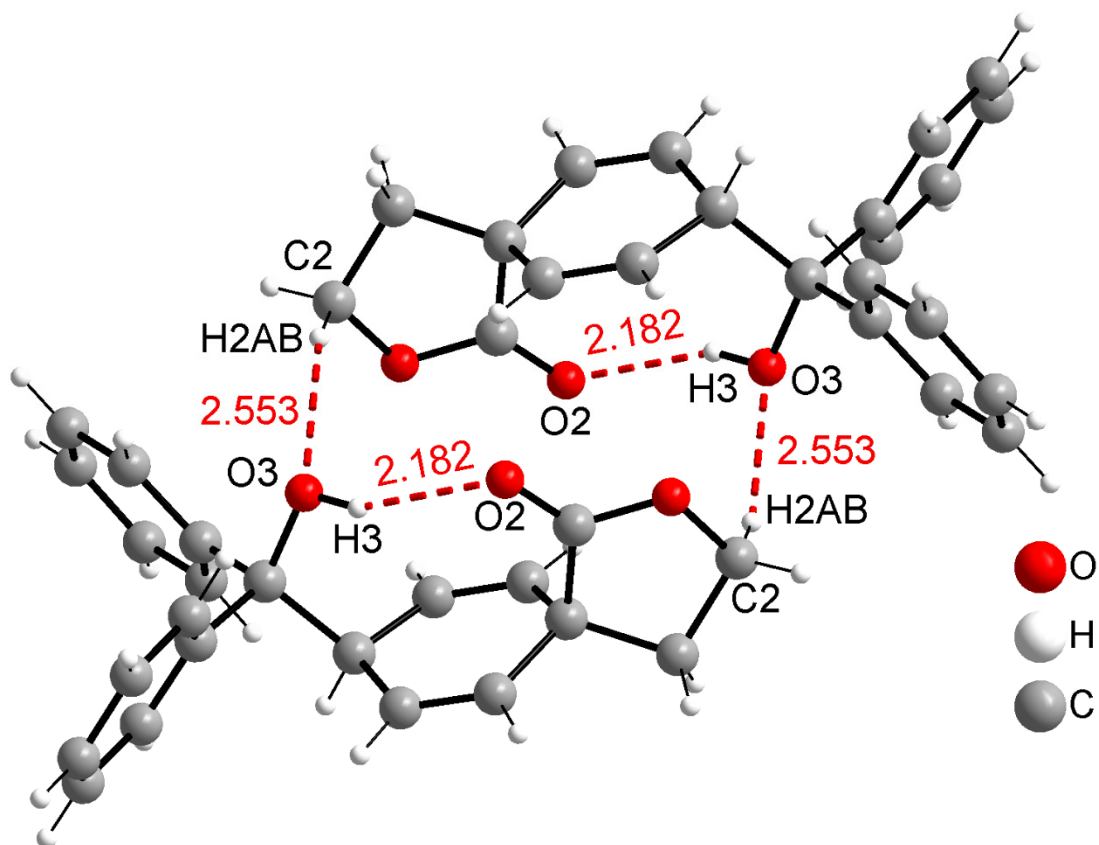

O-H...O and C-H...O hydrogen bonds (red dashed lines) in *cis*-27a forming dimers.



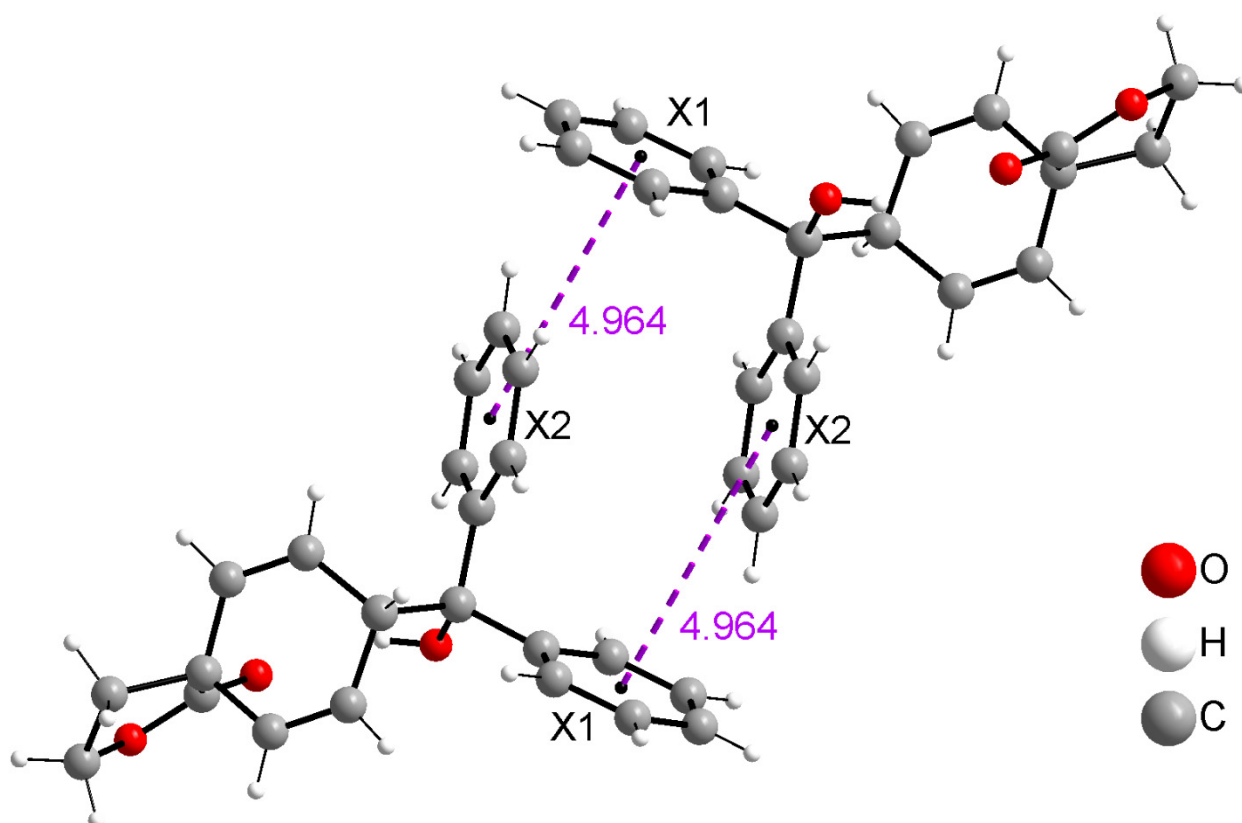

Stacking interactions (purple dotted lines) between the molecules in *cis-27a* (X marks the center of the aromatics).

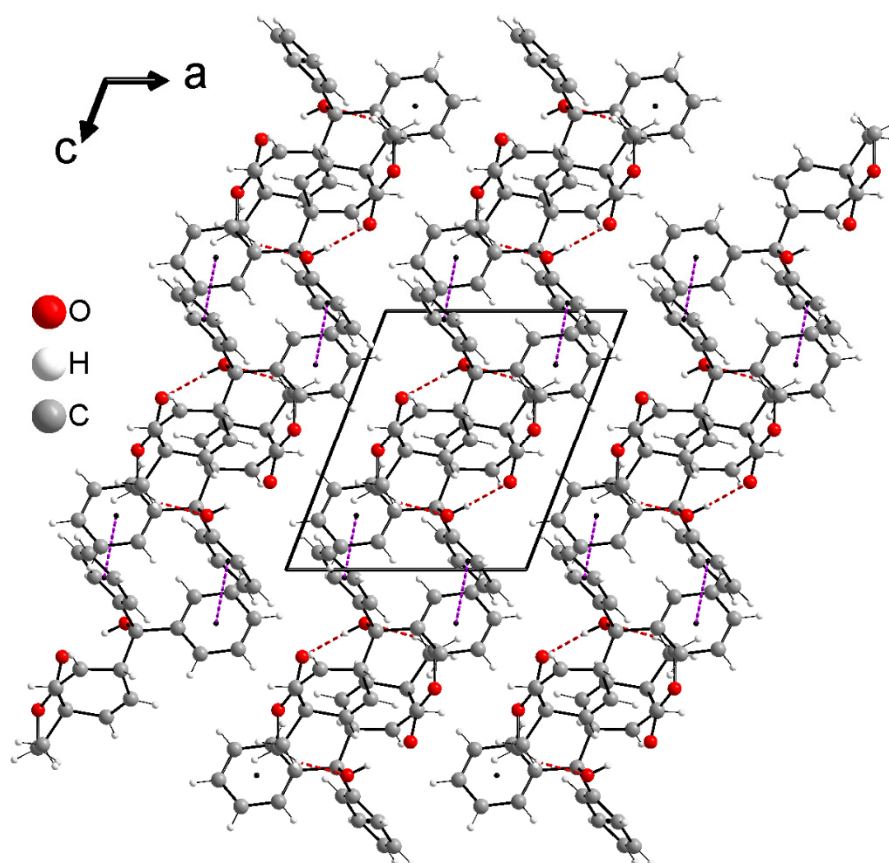

Cell view of *cis-27a* looking along the crystallographic b axis.



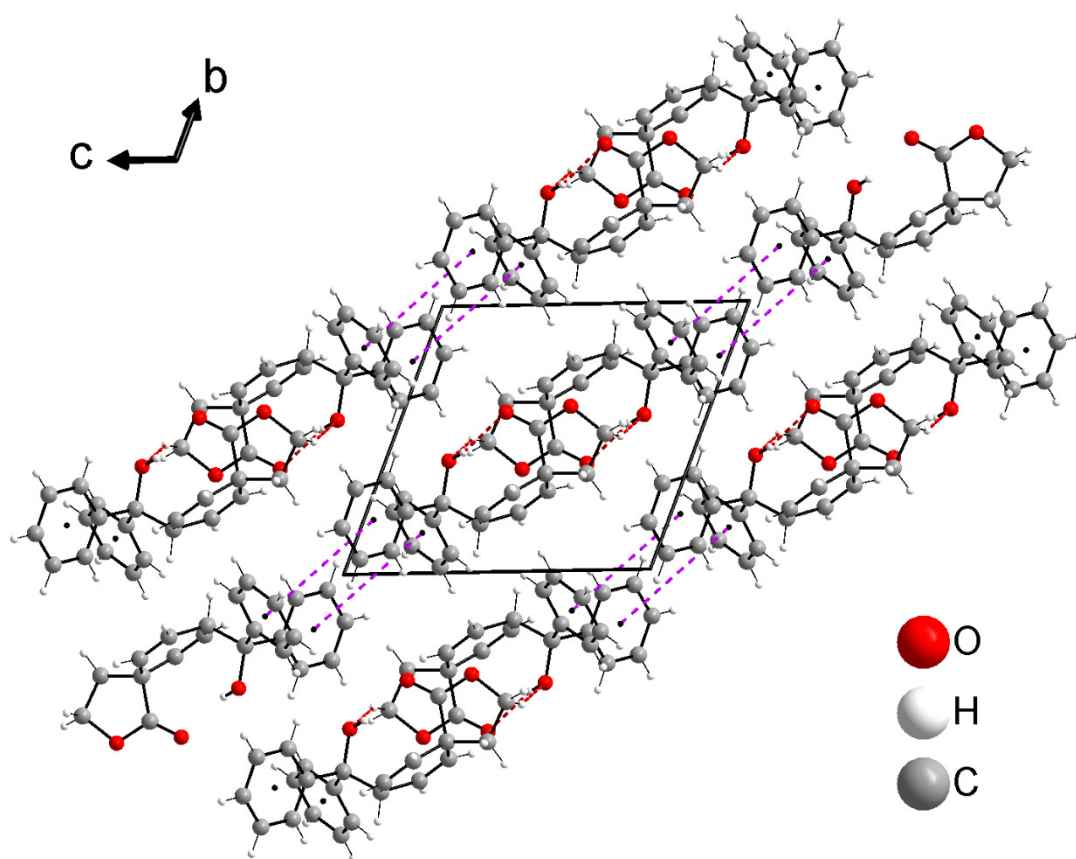

Cell view of *cis*-27a looking along the crystallographic *a* axis.

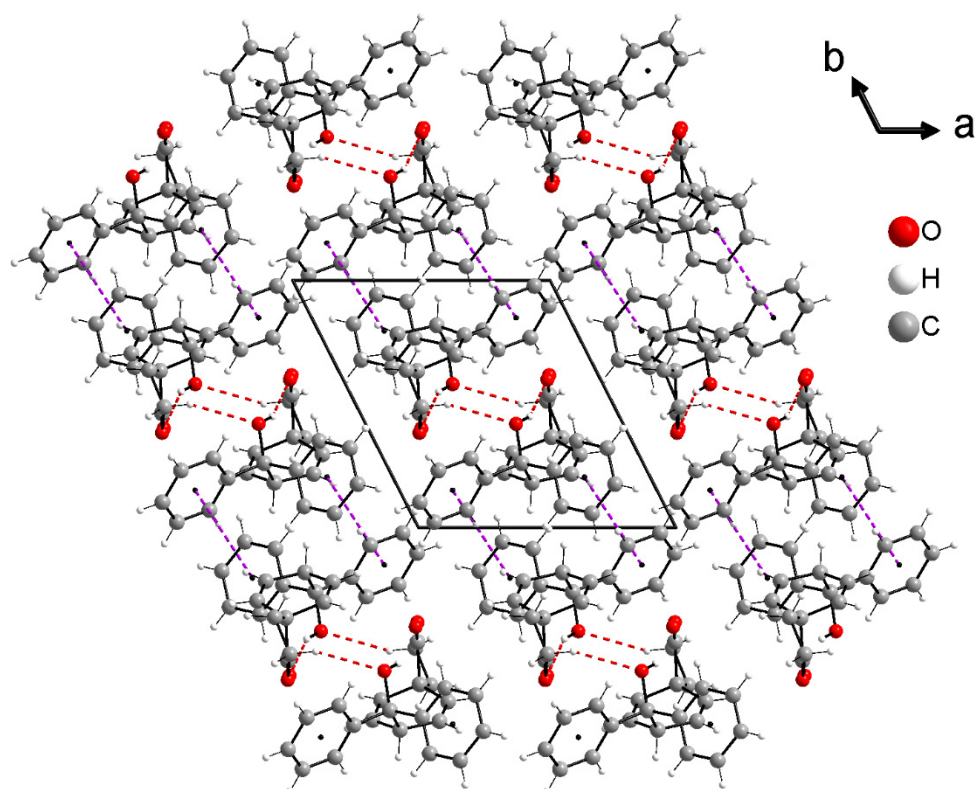

Cell view of *cis*-27a looking along the crystallographic *c* axis.

Compound *trans*-27b:

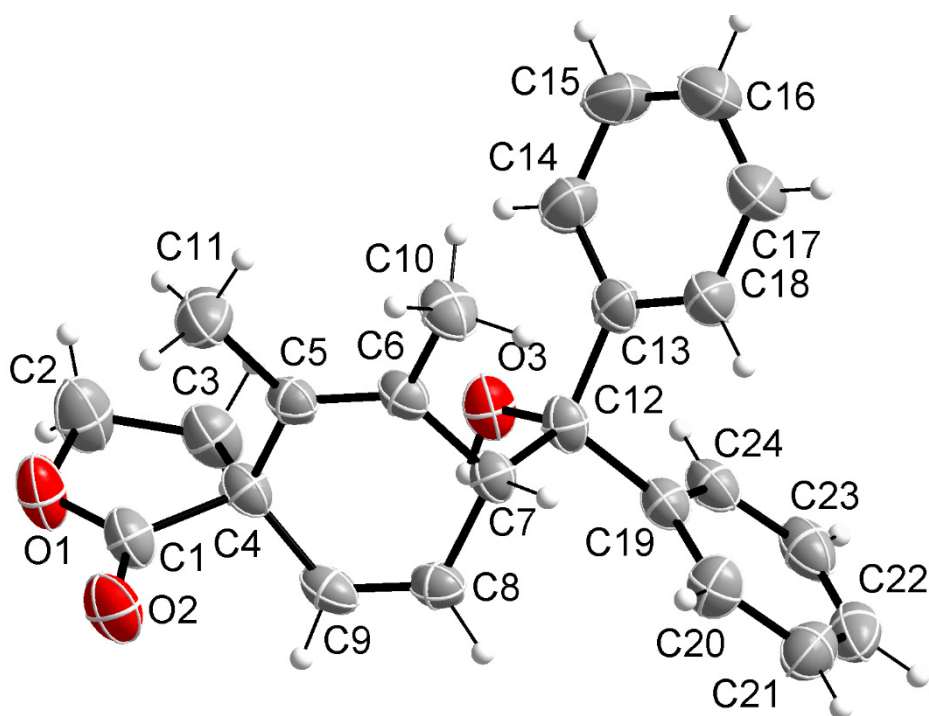

Molecular structure with atom labeling of *trans*-27b. Displacement ellipsoids are shown at the 50% probability level.

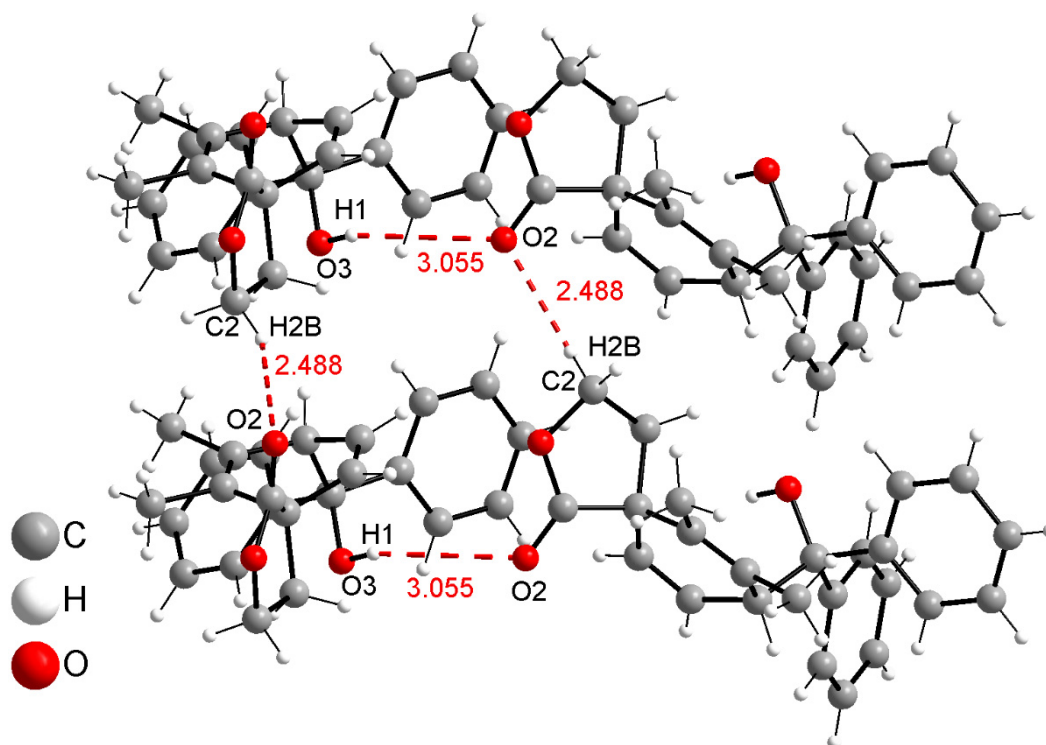

Weak O-H...O and C-H...O hydrogen bonds (red dashed lines) in *trans*-27b forming dimers.

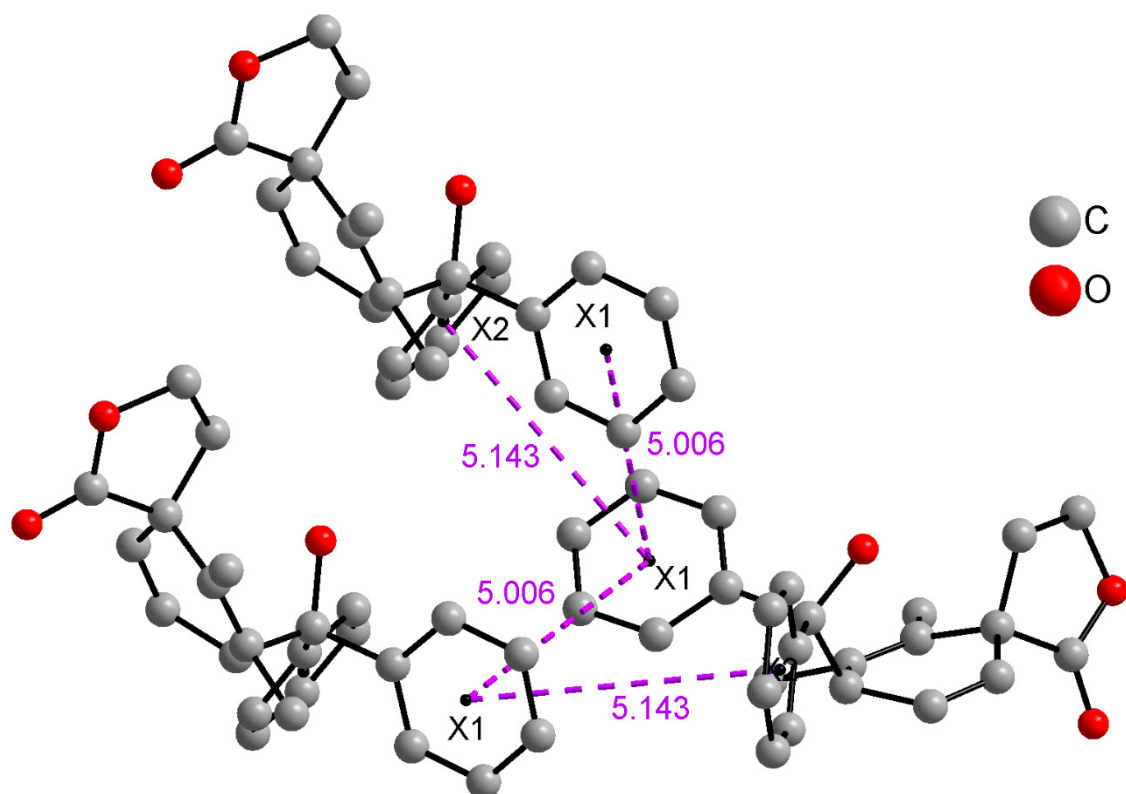

Stacking interactions (purple dotted lines) between the molecules in *trans*-**27b** (X marks the center of the aromatics, hydrogen atoms have been omitted).

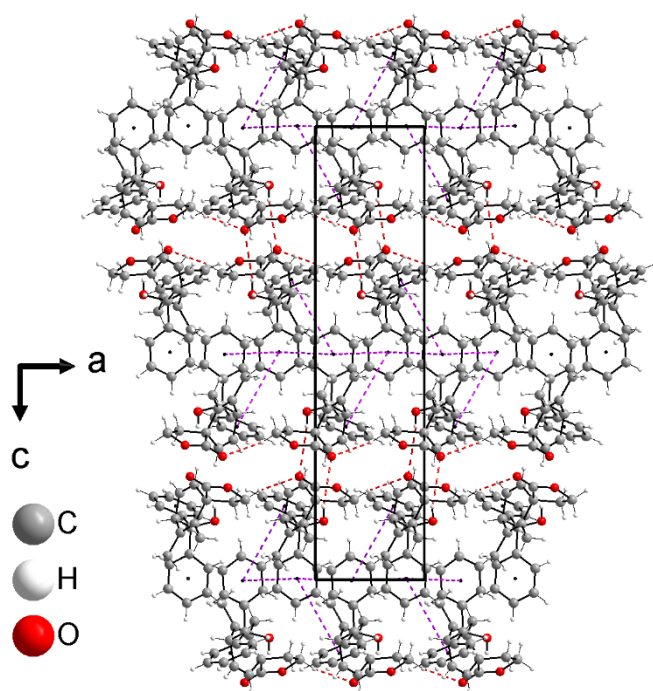

Cell view of *trans*-**27b** looking along the crystallographic b axis.

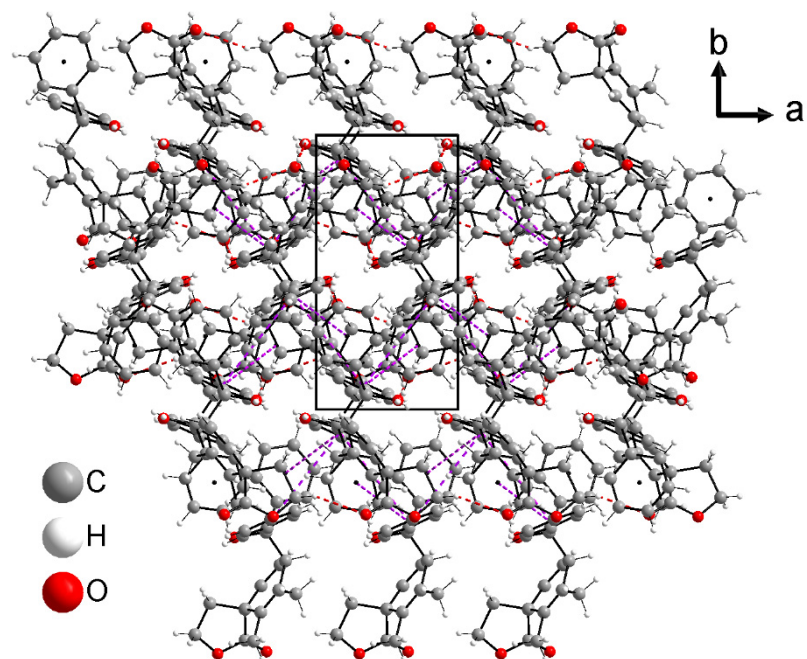

Cell view of *trans*-27b looking along the crystallographic c axis.

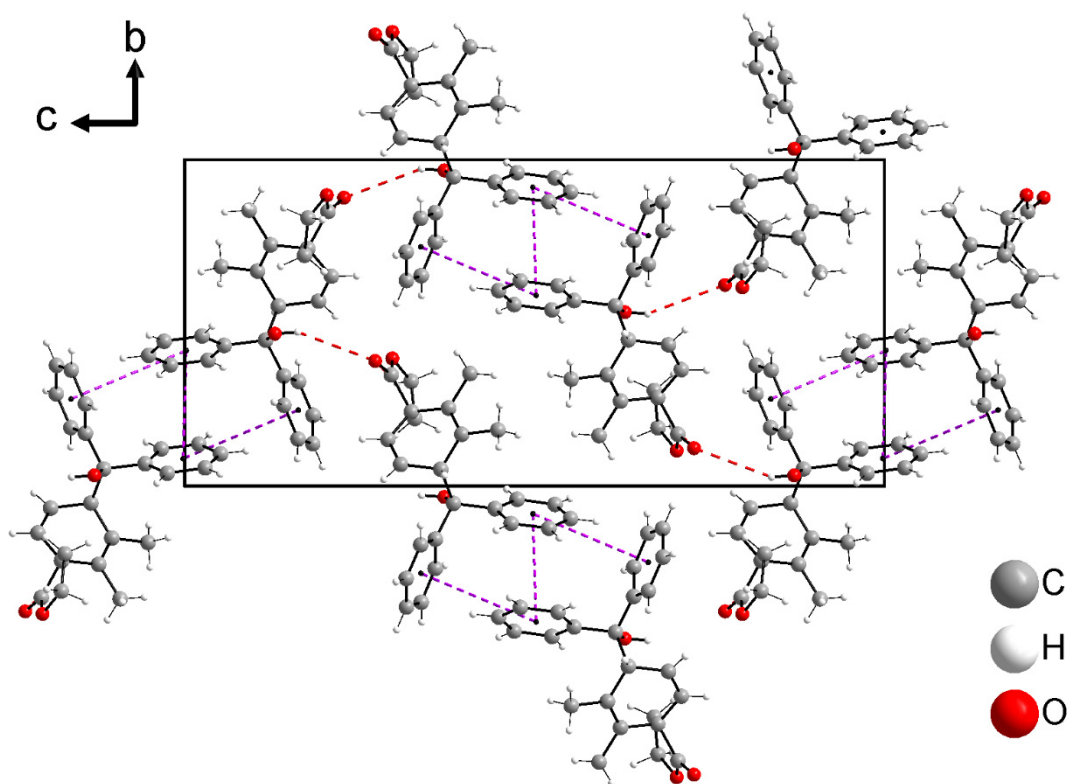

Cell view of *trans*-27b looking along the crystallographic a axis.

Compound *trans*-27c:

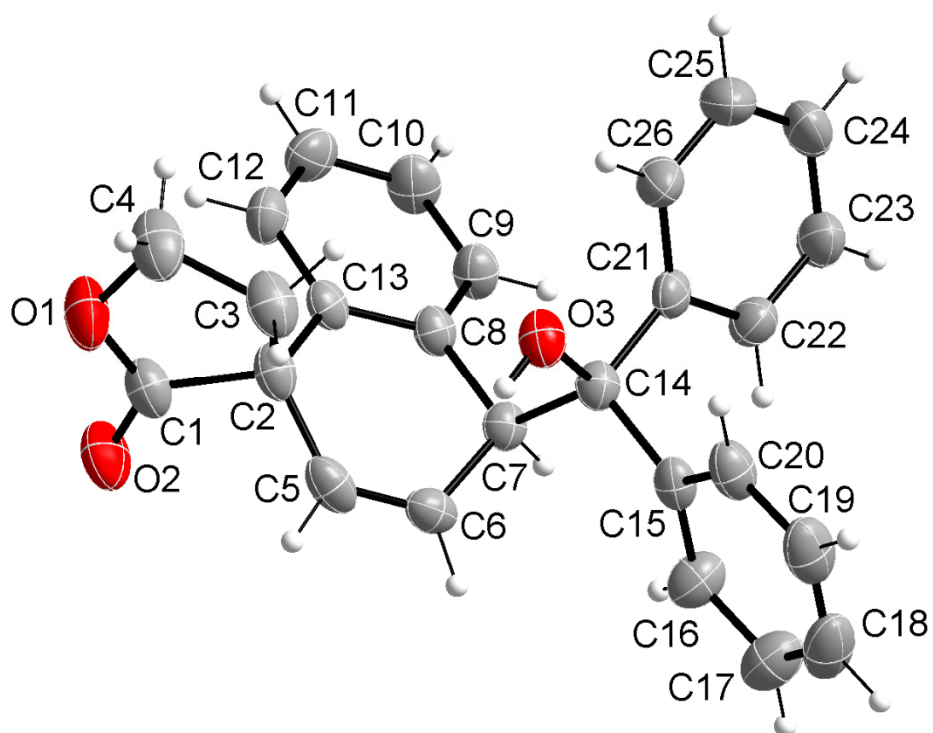

Molecular structure with atom labeling of *trans*-27c. Displacement ellipsoids are shown at the 50% probability level.

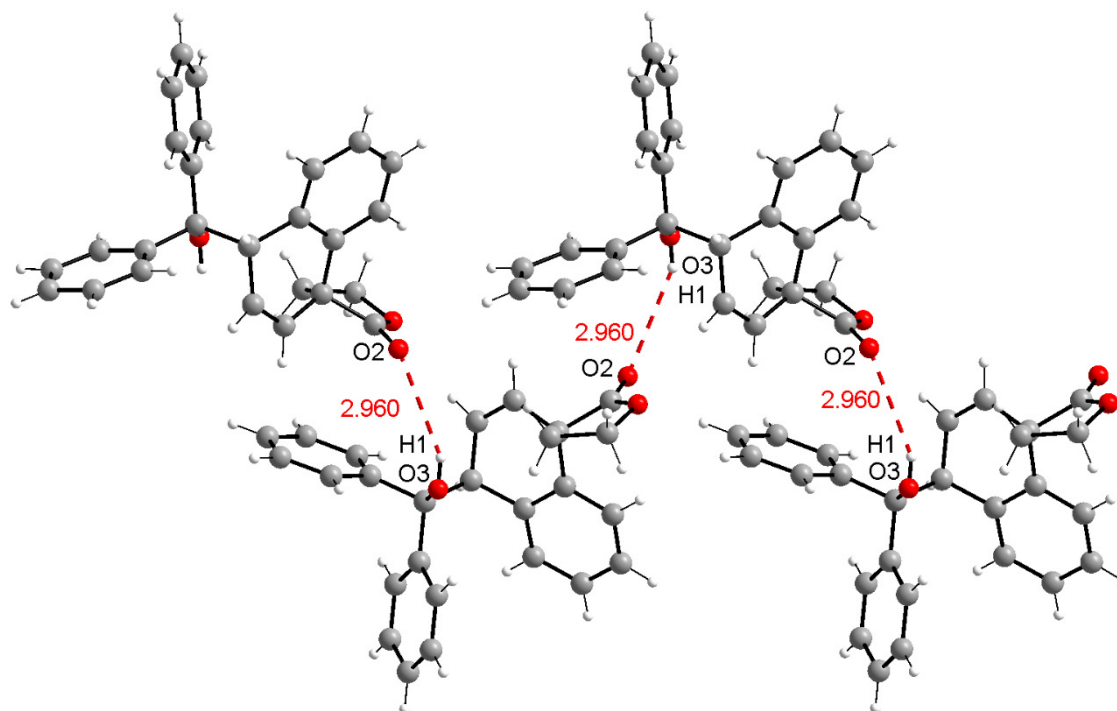

Weak O-H...O hydrogen bonding (red dashed lines) in *trans*-27c forming chains.



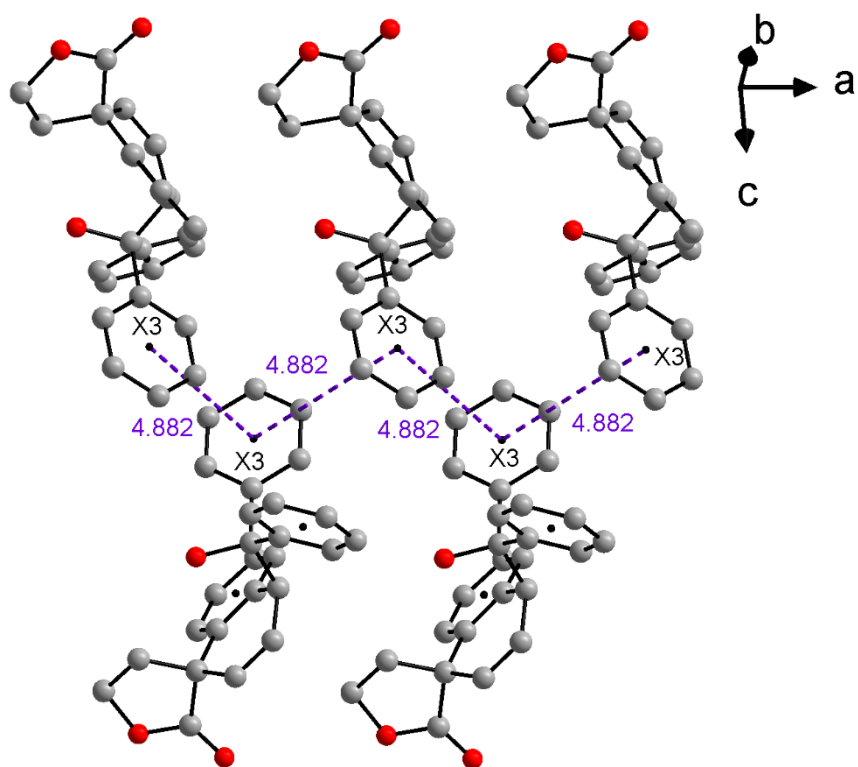

Stacking interactions (purple dotted lines) between the molecules in *trans*-**27c** (X marks the center of the aromatics, hydrogen atoms have been omitted).

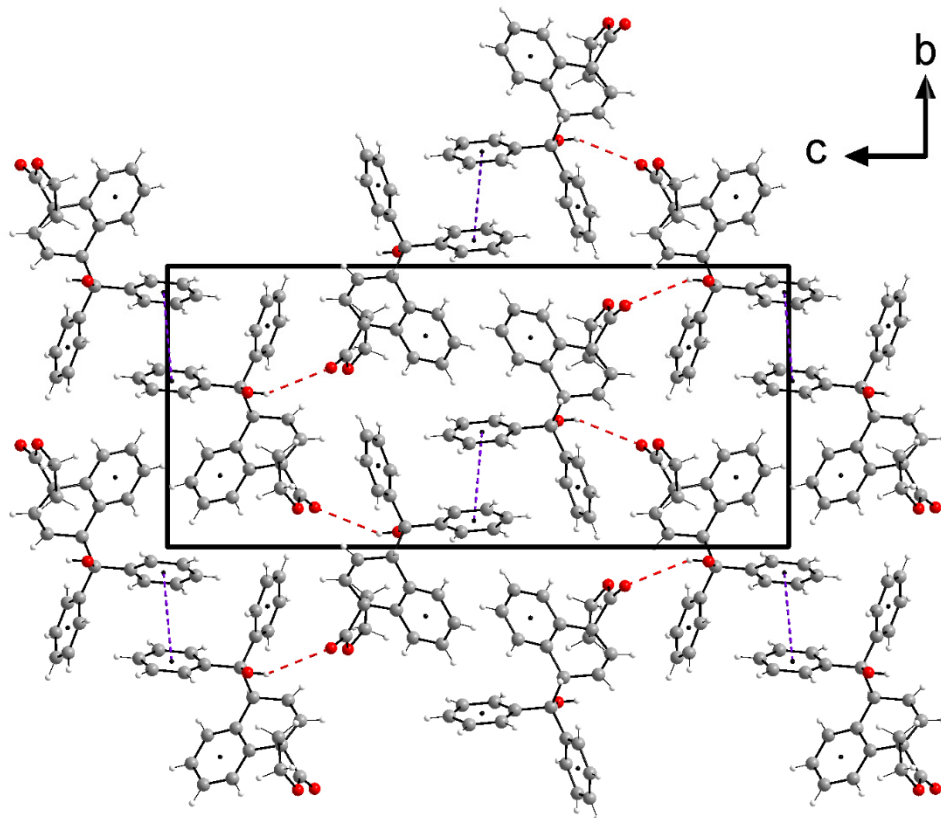

Cell view of *trans*-**27c** looking along the crystallographic *a* axis.

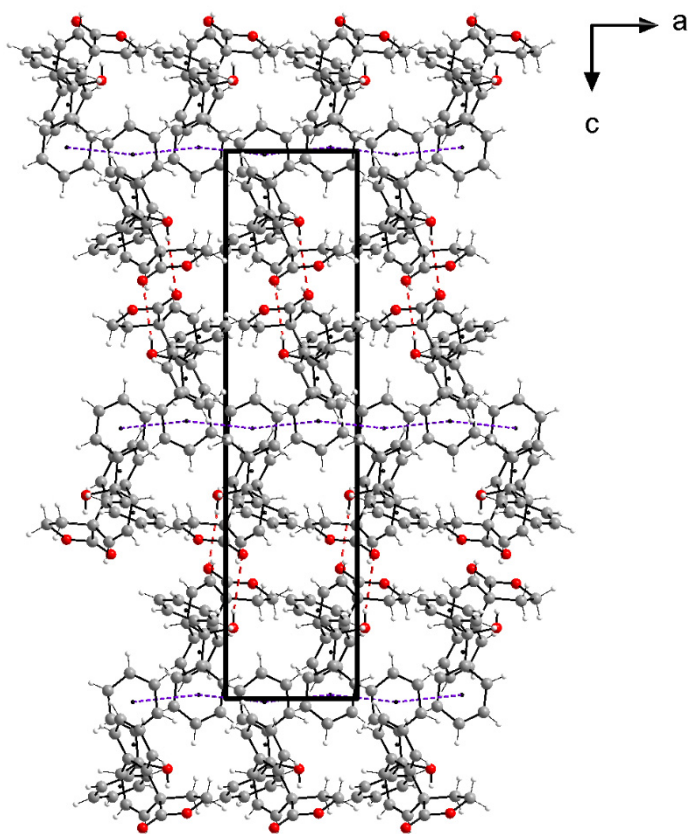

Cell view of *trans*-27c looking along the crystallographic b axis.

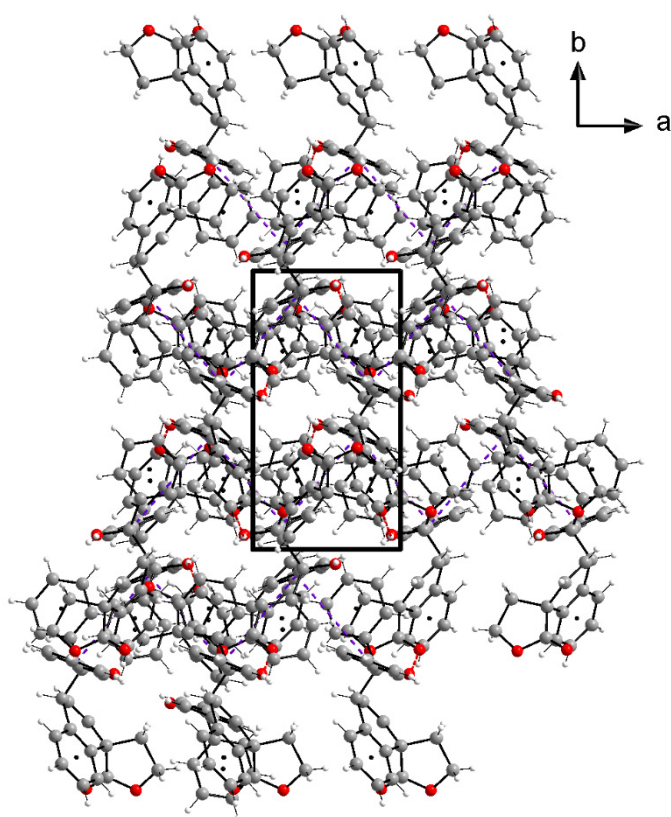

Cell view of *trans*-27c looking along the crystallographic c axis.
